# Supplementary material for: Zircon micro-inclusions as an obstacle for in situ garnet U–Pb geochronology: an example from the As Sifah eclogite locality, Oman
Source: Copernicus journal article supplement (doi:10.5194/gchron-7-309-2025), 2025-08-06
Supplement: Supplementary file 1 [file gchron-7-309-2025-supplement.zip]

## Sheet: S3a_Methods
	Table S3a. LASS-ICPMS trace element methods
	Laboratory & Sample Preparation
	Laboratory name	FIERCE, Frankfurt Isotope & Element Research Center Goethe Univesität, Frankfurt am Main
	Sample type/mineral	Garnet
	Sample preparation	25 mm polished resin mounts
	Imaging	Petrographic microscope & 2400 dpi digital scan
	Laser ablation system
	Make, Model & type	RESOlution ArF excimer laser (COMpex Pro 102)
	Ablation cell	Two-volume ablation cell (Laurin Technic S155)
	Laser wavelength	193 nm
	Pulse width	20 ns
	Fluence	~ 2 J/cm2
	Repetition rate	12 Hz (10Hz for primary RM)
	Pre-ablation	4 pulses (same parameters as main ablation)
	Ablation duration	18 s
	Ablation rate	~ 0.6 μm/s
	Spot shape & size	Round 90 μm and 160 μm (diameter) spots
	Sampling mode	Static spot ablation
	Gasses	Sample cell: He. Funnel: He + Ar. Tubbing: He + Ar + N
	Gas flows	He (300 ml/min), Ar (1100 ml/min), N (5 ml/min).
	ICP-MS Instrument
	Make, Model & type	ThermoScientific ElementXR sector field ICP-MS
	Sample introduction	Ablation aerosol, approximately 30% of the aerosol stream is diverted to the ElementXR
	RF power	1300 W
	Detection system	Secondary electron multiplier (with conversion dynode at -8kV). Simultaneous analogue and counting (pulse) modes of detection (conversion factors calculated per mass and applied offline). Magnetic field fixed. Detection by peak jumping with electrostatic analyzer.
	Masses measured	23Na, 25Mg, 27Al, 29Si, 43Ca, 44Ca, 45Sc, 49Ti, 51V, 53Cr, 55Mn, 57Fe, 85Rb, 88Sr, 89Y, 90Zr, 93Nb, 139La, 140Ce, 141Pr, 146Nd, 147Sm, 151Eu, 157Gd, 159Tb, 161Dy, 165Ho, 167Er, 172Yb, 175Lu, 178Hf, 232Th, 238U
	Dwell times	1.5 ms for masses 23 to 178, 2.0 Ms for masses 232 and 238
	Samples per peak/integration type	4 for all masses/average
	Total time per cycle	0.51 ms
	Number of cycles/total time	54 / 41.6 s
	Acquisition mode	Trigger from laser (20 s after pre-ablation), background: 18 s, ablation: 18 s
	Dead time
	Data Processing
	Gas blank	20 s on-peak zero subtracted.
	Calibration strategy	- Primary RM: NIST SRM-614 for all masses except 25Mg, 45Sc, 49Ti, 53Cr, 55Mn, 57Fe, 59Co, 66Zn, and 90Zr, where BIR-1G is used instead. - Validation RM: BIR-1G or NIST SRM-614
	Reference Material (RM) information	Soda-lime glass NIST SRM-614 (Jochum et al., 2011), basalt glass BIR-1G (Jochum et al., 2005).
	Data processing / LIEF correction	Trace element data were processed using LADR (Norris & Danyushevsky, 2018).
	Uncertainty level & propagation	Uncertainties are quoted at 2s absolute and are propagated in LADR. These uncertainties include those in the background signal, peak signal, and uncertainties in reference material analyses, as well as propagated systematic uncertainties in the published reference material values.

## Sheet: S3b_OM20-13
Table S3b. LASS-ICP-MS trace element analyses of garnet from sample OM20-13A (Session 1).
	Major elements (wt %)														Trace elements (μg/g)
Analyses	Na	2s	Mg*	2s	Al	2s	Ca (43)	2s	Ca (44)	2s	Mn*	2s	Fe*	2s	Sc*	2s	Ti*	2s	V	2s	Cr*	2s	Co*	2s	Zn*	2s	Rb	2s	Sr	2s	Y	2s	Zr*	2s	Nb	2s	Cs	2s	Ba	2s	La	2s	Ce	2s	Pr	2s	Nd	2s	Sm
11	0.0138145	0.000100599	2.9131	0.0168724	10.7999	0.0850662	1.99325	0.013884	2.11869	0.014484	0.0553889	0.000332975	25.0739	0.144955	55.686	0.80821	221.164	3.32403	57.0358	0.714723	175.759	1.78405	76.4075	0.961655	364.503	6.21994	0.0152927	0.00103589	0.0254302	0.00119912	6.23477	0.074213	17.3414	1.66912	0.114902	0.00342189	0.0028924	0.000368571	0.0110361	0.0018365	0.027365	0.00151443	0.029696	0.00173593	0.016945	0.00110669	0.235863	0.0117943	1.97634
12	0.112644	0.0182965	1.63097	0.00944642	10.6651	0.0840046	2.27004	0.016	2.39242	0.0163553	0.136171	0.000818602	27.3053	0.157855	76.4625	1.10975	346.213	4.42646	100.853	1.38073	147.14	1.49355	49.3878	0.621589	167.937	2.44385	0.022645	0.00127212	0.0193607	0.00103853	169.2	2.54929	133.597	8.48687	0.372296	0.0468256	0.00136462	0.000239322	0.00923156	0.00167841	0.00368269	0.000394201	0.0110376	0.00115955	0.0064785	0.000462865	0.291235	0.0105358	3.62225
13	0.00200981	1.46357e-05	2.21175	0.0128103	10.716	0.0844059	1.79991	0.015663	1.93673	0.01324	0.166189	0.00099906	26.6876	0.154284	91.9643	1.40318	216.725	6.93659	59.2299	0.771093	143.618	1.56847	53.1446	0.690029	261.59	5.06612	4.03569	0.407685	0.207074	0.0236443	17.4918	0.212872	39.838	3.89012	0.0159083	0.00329596	0.263131	0.0284645	42.6356	3.63998	0.0103562	0.00114703	0.0116653	0.00171409	0.00660736	0.000470977	0.157859	0.00709956	2.0562
14	0.00599158	4.36314e-05	2.62332	0.015194	10.9071	0.0859111	1.91516	0.014485	2.03079	0.0138831	0.0978138	0.000588016	25.8845	0.149641	59.421	0.862418	193.43	2.26579	47.0965	0.602284	143.279	1.49093	64.7448	0.848598	292.833	4.75345	0.256723	0.0326785	0.168268	0.0369905	10.2177	0.113814	37.1949	2.53599	0.0319751	0.00701209	0.0251737	0.00173526	1.62194	0.208776	0.00652716	0.00096671	0.008864	0.00103381	0.00729488	0.000760323	0.183561	0.0105183	2.04987
15	0.0252545	0.000183906	1.85901	0.0107672	10.6985	0.0842681	2.13972	0.014516	2.27179	0.0155306	0.125989	0.000757391	27.3642	0.158196	98.3965	1.4281	481.38	11.1502	86.3296	1.08181	163.763	1.66228	53.7075	0.675956	267.969	4.23323	0.0131488	0.000969804	0.021297	0.00110483	42.8137	0.5754	707.374	54.0182	0.734602	0.0248676	0.00150714	0.000255658	0.0271714	0.00292955	0.00536757	0.000823305	0.0305686	0.00202831	0.00856232	0.000738085	0.26054	0.00998393	3.08586
16	bdl		1.81194	0.0104946	10.8637	0.0855689	2.19781	0.01491	2.34248	0.0160139	0.124923	0.000750984	27.5682	0.159375	99.9206	1.45022	301.793	4.02196	88.9899	1.11514	135.544	1.41318	52.6334	0.662438	193.853	2.99778	0.00220231	0.000388899	0.00362938	0.000444388	47.8827	0.672995	12.1678	0.659613	0.00523147	0.000635194	0.00465114	0.0004968	bdl		0.00110103	0.000216253	0.0046321	0.000436561	0.00599127	0.000710419	0.267718	0.0107515	3.61622
17	0.00737162	5.3681e-05	2.81277	0.0162913	10.7216	0.0844499	2.0145	0.013666	2.12854	0.0145513	0.0655213	0.000393887	25.0568	0.144856	46.9951	0.682072	207.734	2.21056	50.4477	0.632167	171.797	1.74383	72.8098	0.916375	335.504	5.47785	2.07143	0.193895	0.126059	0.0169037	7.21765	0.0843042	111.594	12.0619	0.0703498	0.0179498	0.137768	0.0170345	31.6364	3.93584	0.267078	0.099952	0.879959	0.347228	0.177025	0.0668266	1.13576	0.369618	2.52608
18	0.179935	0.0243549	1.93812	0.0112254	10.6465	0.0838583	1.81186	0.01587	1.98444	0.0135662	0.141377	0.00101566	26.7723	0.154774	128.94	2.02126	452.306	9.04899	69.451	1.11324	141.847	1.83086	49.8899	0.663156	201.863	3.54278	0.0182556	0.0011221	0.0120102	0.000800172	17.9765	0.217723	182.754	8.80451	1.57432	0.0800192	bdl		0.0380214	0.00338654	0.0233739	0.00464967	0.0742047	0.0175912	0.014828	0.00338542	0.217267	0.01461	1.99283
19	0.115154	0.00467503	1.50699	0.00872836	10.5511	0.0831068	2.31668	0.015716	2.43333	0.016635	0.186705	0.00112239	27.5029	0.158997	64.9211	0.942244	506.489	13.5755	107.958	1.35284	176.677	1.85526	39.9769	0.503144	191.681	3.24259	0.083025	0.00707622	0.0354078	0.00440913	160.63	2.01734	765.66	20.2214	0.820839	0.105632	0.00451513	0.000489386	0.186084	0.0161506	0.0182337	0.00477694	0.0671355	0.0175926	0.0191451	0.00264912	0.45383	0.0170359	4.34179
20	0.00969466	7.05977e-05	1.48554	0.0086041	10.6621	0.0839807	2.41485	0.016382	2.54214	0.0173788	0.288246	0.00173281	27.7404	0.16037	27.5452	0.399782	395.701	2.6061	71.3806	0.89448	91.4641	1.00757	35.7777	0.450293	206.751	3.49696	0.0222288	0.00127512	0.395633	0.0228635	119.563	1.62171	207.16	7.62279	0.0352296	0.00202526	0.00427495	0.000472415	0.150243	0.0231409	0.00299005	0.000359187	0.0167108	0.00247902	0.00787828	0.00102213	0.266934	0.0121958	3.03002
21	0.0249236	0.000181496	2.41904	0.0140109	10.7701	0.084832	1.7416	0.015106	1.87662	0.0128291	0.161887	0.0009732	26.1146	0.150971	86.0883	1.40324	427.924	41.2029	52.7956	0.697508	95.7486	1.10905	63.2154	0.846215	399.133	6.74996	0.233481	0.0183761	0.852482	0.0420413	14.8647	0.25714	101.145	6.99718	0.965614	0.135316	0.0074949	0.000682257	44.7751	3.08339	0.00125968	0.000231057	0.00755521	0.000785578	0.00278899	0.000444234	0.126376	0.0096655	1.70402
22	0.0121588	8.85416e-05	2.17007	0.0125689	10.7534	0.0846999	1.89204	0.016369	2.06004	0.014083	0.139151	0.000836515	26.6309	0.153956	95.1898	1.41062	261.405	6.7381	68.8567	0.867825	101.175	1.18523	63.0686	0.846158	378.342	6.78752	0.219371	0.0256685	0.487778	0.0129496	26.535	0.391387	11.4501	1.33838	0.304122	0.0667638	0.0154215	0.0011602	2.89193	0.309946	0.0257834	0.00242279	0.0113634	0.00088887	0.0118178	0.00109059	0.189524	0.00690788	2.24792
23	0.155677	0.013208	1.41053	0.00816966	10.4908	0.095022	2.18597	0.017336	2.31119	0.0184331	0.468123	0.00281416	27.3135	0.157902	70.3505	1.02105	684.214	25.9749	53.7406	0.841715	87.8251	1.06498	27.193	0.342247	252.431	3.71202	0.732225	0.0566606	0.0743209	0.00686075	80.6342	1.15159	213.539	9.65633	2.73197	0.172434	0.026429	0.00351567	4.77602	0.204673	0.0216016	0.0017745	0.0431417	0.00199621	0.0118894	0.00140956	0.215448	0.0170243	1.8196
24	0.00994487	7.24197e-05	0.955678	0.0055352	10.6688	0.0840336	2.39261	0.016231	2.51355	0.0171833	4.00503	0.0240766	25.488	0.147349	63.7487	0.938744	343.824	2.38193	35.8714	0.449509	55.6977	0.610932	7.25528	0.0913655	212.006	3.43903	0.0848967	0.00742248	1.21607	0.0441776	261.908	2.89202	177.657	9.43104	0.140442	0.00711545	0.00306218	0.000385708	1.56169	0.0832883	0.0116599	0.00116941	0.020187	0.00141375	0.00920307	0.000762939	0.128257	0.00636751	1.01059
25	0.0150546	0.00317216	1.628	0.00942921	10.6596	0.0839615	2.08947	0.014175	2.26503	0.0154844	0.230385	0.00138498	27.3535	0.158133	39.3433	0.57154	379.945	3.72174	80.0913	1.00363	62.1024	0.890743	43.6673	0.577781	359.485	6.2837	0.11244	0.0104911	0.150213	0.0059778	77.2362	0.828852	20.0282	0.954994	1.4191	0.0682999	0.00450443	0.000483576	0.476321	0.0404389	0.00679655	0.000537408	0.00853694	0.00137818	0.00675892	0.000735365	0.171028	0.0084701	2.12839
26	0.277481	0.0166415	1.7257	0.0099951	10.4365	0.082204	2.22346	0.015084	2.35886	0.0161258	0.217645	0.00130839	26.1647	0.151261	41.1369	0.627138	387.605	5.98044	104.577	1.41384	120.616	1.30352	47.0944	0.592724	406.487	5.9185	0.0324908	0.00153099	0.0429289	0.00749793	101.09	1.07861	193.568	11.3022	0.585264	0.0887016	0.0015742	0.000256503	0.13645	0.0223781	0.00668282	0.00107898	0.0187167	0.00157664	0.00888297	0.00104338	0.244812	0.0134492	2.80897
27	0.010516	7.65787e-05	2.33202	0.0136836	10.7455	0.0846383	2.08231	0.014126	2.23979	0.0153119	0.184507	0.00110918	26.1163	0.150981	46.1725	0.781589	274.001	3.03585	87.0255	1.22113	164.518	1.66994	69.2862	0.929053	409.162	6.97346	0.00540564	0.000610236	0.0568722	0.0125718	75.2682	2.35117	27.4809	2.84538	0.00374894	0.000535542	bdl		0.0967744	0.0127156	0.000104544	6.63086e-05	0.00463339	0.000435123	0.00519288	0.000611714	0.218261	0.0100613	2.71532
28	bdl		2.06926	0.011985	10.8643	0.0927924	2.5025	0.018626	2.64162	0.0197875	0.180979	0.00108797	26.5215	0.153324	32.0811	0.465615	470.33	8.11473	115.177	1.48575	175.848	1.86006	62.2448	0.783405	405.22	6.36976	0.0597835	0.0131738	0.386396	0.0968827	149.794	2.23983	15.1769	1.81359	0.436012	0.0335309	0.0101079	0.000916712	2.05423	0.808443	0.013027	0.000868342	0.010715	0.000830119	0.00854971	0.00137072	0.297436	0.0183679	3.65992
29	0.00457346	3.33045e-05	2.4044	0.0139261	10.8041	0.0850996	1.84034	0.015227	1.98921	0.0135988	0.155976	0.000937661	26.0685	0.150705	46.4186	0.697343	173.063	1.67628	59.3178	0.801713	122.473	1.51689	67.8042	0.897895	366.941	6.45568	0.00509631	0.000591092	0.00381708	0.000452407	41.6859	0.778478	8.7456	1.63295	0.00274811	0.000456945	bdl		0.00593008	0.00134843	bdl		0.00100322	0.000201057	0.00371275	0.000349841	0.147076	0.00723799	2.10575
30	bdl		2.15157	0.0124617	11.0341	0.0869112	1.80898	0.014179	1.95177	0.0133429	0.170737	0.0010264	27.2162	0.15734	100.781	1.47539	314.715	7.24541	52.3097	0.670219	122.61	1.34157	53.952	0.69176	210.016	3.10532	0.0108101	0.00084784	0.211169	0.0689974	18.3829	0.19648	37.654	1.49757	0.241287	0.0129119	0.00174164	0.000268451	0.0269394	0.00282109	2.63895	0.717935	9.79969	2.67943	1.70145	0.46312	8.93998	2.4147	4.2054
31	0.00390799	2.84585e-05	2.44998	0.0141901	11.1386	0.0877343	1.78746	0.016147	1.91338	0.0130804	0.146906	0.000883138	26.6109	0.15384	83.8577	1.23774	327.288	26.1515	45.1083	0.628069	132.546	1.83284	59.4204	0.83951	265.991	4.44722	0.00748452	0.000697806	0.00898357	0.000677751	14.1489	0.173232	45.1817	2.76469	0.694359	0.141384	bdl		0.0069713	0.0014193	0.00171709	0.000260787	0.00842465	0.00091874	0.00449668	0.000543541	0.140001	0.00771533	1.79163
32	0.0215455	0.0021361	1.97756	0.0114538	11.196	0.0881862	2.01518	0.015951	2.18086	0.014909	0.145485	0.000874597	27.451	0.158697	103.75	1.55521	307.055	10.0869	71.9127	0.907646	146.473	1.61734	53.0544	0.668113	220.164	3.34517	0.0483487	0.00782963	0.0301429	0.00126695	24.2644	0.317182	49.104	1.72931	0.26569	0.0169876	0.00291105	0.000359231	0.355868	0.02648	0.00851421	0.00058368	0.0386198	0.0116121	0.0101473	0.00222642	0.224648	0.0112259	2.55865
33	0.00409775	2.98403e-05	1.78472	0.0103369	10.7726	0.0848513	2.2642	0.01536	2.3958	0.0163784	0.12686	0.000762628	27.1834	0.15715	99.8935	1.44982	303.933	2.00172	98.6573	1.23629	143.958	1.46125	52.7217	0.663549	202.578	3.25311	0.00617335	0.000655774	0.00398471	0.000464984	75.537	1.05331	249.332	22.5757	0.0192576	0.0013806	bdl		0.0126068	0.0019823	0.0010292	0.000209173	0.00838404	0.00108527	0.00469452	0.000688611	0.237151	0.0111822	3.5657
34	0.00432623	3.15041e-05	2.15786	0.0124981	10.9668	0.0863807	1.91475	0.016844	2.05022	0.0140159	0.16381	0.000984759	26.9079	0.155557	92.8305	1.43525	214.493	1.91098	70.9975	0.92951	161.45	1.76552	52.9102	0.670717	232.35	3.65384	0.000716683	0.000219018	0.0304979	0.00130959	17.6542	0.226603	221.627	9.80184	0.011925	0.00166532	bdl		0.00405555	0.0011082	0.00173639	0.000268572	0.00583664	0.000840264	0.00437843	0.000758527	0.167754	0.00948487	2.26286
35	0.0105599	7.68983e-05	2.12429	0.0123037	10.7501	0.0846738	1.92324	0.013047	2.0464	0.0139898	0.154685	0.000929901	26.6083	0.153826	75.1585	1.09083	754.382	134.381	75.5006	0.946108	164.716	1.89281	54.8015	0.703399	320.955	5.92427	0.00759527	0.000729042	0.0150876	0.000916351	16.84	0.174551	115.353	17.2382	1.12324	0.304586	0.002434	0.000334037	0.00750592	0.00152836	0.00316177	0.000367779	0.00868201	0.00145514	0.00496295	0.000541139	0.172466	0.0109573	2.34641
36	0.0155668	0.00011336	1.90247	0.0110189	10.9655	0.0863709	2.064	0.016396	2.21568	0.015147	0.136119	0.000818289	27.2683	0.157641	115.834	1.77165	753.266	86.7339	87.1558	1.11927	143.986	1.75018	52.0121	0.684495	211.459	3.25767	0.00799858	0.000733938	0.0196836	0.0010319	28.8709	0.337978	340.072	11.2846	1.89026	0.296766	bdl		0.0068561	0.00143178	0.00368752	0.000389695	0.0129156	0.0012864	0.00620441	0.000707544	0.233754	0.0112122	3.02399
37	0.00783849	5.70808e-05	2.69093	0.0155856	10.957	0.0863037	1.87605	0.020085	1.99911	0.0136665	0.0924903	0.000556013	25.6137	0.148076	44.14	0.702458	182.952	1.73842	49.9306	0.705931	178.459	2.34117	67.8078	0.94255	302.386	5.27974	2.76003	0.219216	0.0547159	0.0118545	9.47593	0.11976	190.799	18.8962	0.0132931	0.00165629	0.169119	0.0166439	18.4971	1.14468	0.0123549	0.00121578	0.00814264	0.00128367	0.00769923	0.000687879	0.202559	0.0122008	2.06548
38	0.0343773	0.00274207	2.2133	0.0128192	10.7748	0.0848688	1.80518	0.019269	1.94949	0.0133273	0.162454	0.000976606	26.3805	0.152508	74.3326	1.19439	197.103	4.06258	59.8369	0.864209	104.766	1.29504	52.2637	0.736109	232.48	4.08589	0.334327	0.0323381	0.0223251	0.00110874	15.2311	0.194372	63.2542	1.67876	0.0445337	0.0149782	0.0192185	0.00379212	2.81402	0.206733	0.0040168	0.0004093	0.00421364	0.000697188	0.00444657	0.000695173	0.1648	0.00720641	2.06159
39	0.00469806	3.42118e-05	2.69495	0.0156089	10.8209	0.0852321	1.85402	0.012577	1.96217	0.013414	0.0965804	0.000580601	25.4114	0.146906	31.5463	0.471102	267.734	4.882	51.6459	0.647182	211.318	2.21939	69.3709	0.886048	385.033	6.66681	0.00411047	0.000530794	0.0295741	0.00129582	8.41792	0.102659	6.79904	1.13707	0.487148	0.0266822	0.000620327	0.0001566	0.0210766	0.00255483	0.00103978	0.000209054	0.004314	0.00102379	0.00434292	0.00100911	0.161533	0.00755019	1.82621
40	0.0112662	8.20415e-05	2.76794	0.0160316	11.0257	0.086845	2.03214	0.013786	2.13709	0.0146098	0.0757212	0.000455204	25.3042	0.146286	40.8016	0.592182	718.966	150.068	57.5916	0.721688	220.983	2.24309	72.6434	0.914282	386.485	6.21604	bdl		0.0640597	0.0177108	8.15594	0.0952243	1068.19	47.3353	3.37356	1.15876	0.00270621	0.000351417	0.0879543	0.00653999	0.00301096	0.000610879	0.0187306	0.00207648	0.00639891	0.000671333	0.186142	0.0118155	2.12672
41	0.00674382	4.91093e-05	1.62542	0.00941425	10.8493	0.0854552	2.3856	0.016184	2.52122	0.0172358	0.148494	0.000892685	27.4428	0.15865	44.3368	0.64349	746.418	12.1402	107.879	1.35185	146.344	1.48546	48.9991	0.616697	250.617	3.93026	0.135952	0.00356709	0.0144259	0.000893935	165.64	2.23661	133.749	7.36354	6.56799	0.147356	0.00865155	0.000755075	0.434088	0.0126863	0.00696635	0.000548431	0.0176254	0.00214553	0.00925218	0.000858937	0.339196	0.0139152	4.09082
42	0.00441337	3.21387e-05	2.1587	0.012503	10.8541	0.0854929	1.84774	0.017018	1.99988	0.0136717	0.168642	0.0010138	26.7418	0.154597	98.9209	1.55654	341.426	16.0684	63.7601	0.873324	130.273	1.6339	51.0103	0.735578	214.635	3.78027	0.0104984	0.000852371	0.00868881	0.000682902	17.8265	0.227754	44.7456	7.78857	1.65568	0.243708	bdl		0.001107	0.000580581	0.00102617	0.000206807	0.00333531	0.000366529	0.00392737	0.000399863	0.15658	0.00855888	2.16919
43	0.00652579	4.75216e-05	2.38909	0.0138374	10.9894	0.0865588	1.85653	0.012594	1.95687	0.0133777	0.155255	0.000933331	26.471	0.153032	66.6109	0.96677	229.814	1.63125	62.3392	0.78118	175.122	1.83062	55.6407	0.700491	243.224	3.62675	bdl		0.0283325	0.00126533	14.6062	0.156046	38.191	2.11547	0.00792834	0.000784001	0.00104058	0.000206188	0.000225974	0.000263217	0.00145884	0.000247612	0.00386707	0.00090967	0.00420528	0.000575428	0.16837	0.00782944	2.06688
44	bdl		2.52998	0.0146534	11.1007	0.0874356	1.87788	0.012739	1.99591	0.0136446	0.127639	0.000767311	26.1521	0.151188	62.7618	0.910905	201.53	7.40344	50.801	0.647279	123.508	1.26239	59.2089	0.745196	253.409	3.83419	0.00288913	0.00043825	0.0119589	0.000796248	12.5713	0.134902	196.381	18.9675	0.0559502	0.0139237	bdl		0.00562078	0.00129697	0.00143762	0.000242534	0.00588522	0.000737335	0.00386765	0.000476363	0.177719	0.00755375	2.1857
45	0.0593549	0.00381122	2.92894	0.0169642	10.7943	0.0850221	1.87669	0.014864	1.98414	0.0135641	0.0555421	0.000333896	24.7476	0.143069	48.9592	0.732809	214.935	2.26949	71.3866	0.906352	160.433	1.7108	79.2915	0.999916	404.427	6.65967	bdl		0.0166534	0.00095009	6.99475	0.0725023	406.986	26.0137	0.0950464	0.015053	4.34386e-05	4.01271e-05	0.0119841	0.00190775	0.00228127	0.000307662	0.015449	0.00114419	0.00584619	0.000780948	0.153557	0.00801001	1.57611
46	0.00624346	4.54656e-05	2.71979	0.0157527	10.9501	0.0862494	1.934	0.020211	2.06481	0.0141157	0.0797836	0.000479626	25.4164	0.146935	41.7105	0.667196	239.037	1.93372	54.6028	0.711963	141.071	1.55125	68.3975	0.897631	306.109	4.71568	0.0160656	0.00105611	0.0156378	0.000917605	8.35676	0.124724	62.1397	6.17221	0.0123149	0.00443715	0.00157581	0.000256882	0.106077	0.00578671	0.0012829	0.000229921	0.00611308	0.00100294	0.00332003	0.000452602	0.169528	0.00756555	1.93348
47	bdl		2.75668	0.0159665	10.8412	0.0853916	1.95188	0.013241	2.04903	0.0140078	0.0749537	0.00045059	25.2181	0.145788	25.3426	0.368394	580.695	38.2201	56.6079	0.709362	178.363	1.81048	72.063	0.906976	332.902	5.35879	bdl		0.0084042	0.0006779	6.8265	0.0791723	235.779	20.504	3.82716	0.357069	0.000160228	7.8581e-05	0.0141117	0.00210151	0.00924206	0.0006343	0.0247351	0.00591509	0.0078494	0.00152991	0.187119	0.0111156	1.98314
48	0.00571404	4.16104e-05	2.34436	0.0135783	10.9309	0.086098	1.80564	0.012249	1.90625	0.0130317	0.158525	0.000952985	26.5011	0.153206	57.5516	0.83774	833.937	50.7167	62.1263	0.778513	108.413	1.21425	55.6589	0.700517	260.502	4.13169	0.0025006	0.000413343	0.0366708	0.00145263	15.0317	0.192619	148.222	14.8892	5.85524	0.487368	0.00239321	0.00032918	0.0288676	0.00672529	0.0131069	0.00167493	0.0271521	0.00314529	0.00947298	0.00115232	0.178499	0.00833415	2.13545
49	0.00107917	7.85865e-06	1.83823	0.0106469	10.8945	0.0858115	2.0923	0.017609	2.25131	0.0153906	0.130238	0.000782938	27.0627	0.156452	115.445	1.77665	349.249	6.51035	85.715	1.13116	168.997	1.86243	51.0492	0.667953	193.959	3.1409	bdl		0.0100618	0.000730972	33.0116	0.536332	43.2022	4.07625	0.442174	0.0473463	bdl		0.00753715	0.00150856	0.00070492	0.000170256	0.00637479	0.000940537	0.00494381	0.000553902	0.216308	0.0101617	2.91145
50	0.0493185	0.00427426	1.94465	0.0112633	10.9783	0.0864719	1.97349	0.014822	2.15004	0.0146983	0.141871	0.000852867	27.0323	0.156276	111.167	1.67409	363.289	14.4145	78.6607	0.985707	160.529	1.82338	50.17	0.631434	198.022	2.96291	bdl		0.0123795	0.000796947	20.4632	0.269357	373.717	18.5108	0.809731	0.0636155	bdl		0.0237678	0.00263572	0.0072252	0.000539423	0.0402995	0.00736433	0.00891542	0.00134423	0.197443	0.00778812	2.40225
61	0.00246739	1.57201e-05	2.16886	0.0127283	11.2177	0.109697	1.87405	0.02227	2.05651	0.0178473	0.167452	0.00120554	27.1	0.158508	77.2594	1.23535	292.238	16.7943	67.676	0.934634	163.516	2.69537	51.9107	0.717387	225.802	4.42783	0.0062032	0.000628045	0.077254	0.00212066	18.4046	0.321862	46.8898	2.01605	0.549809	0.119117	0.0013212	0.00022644	0.00764296	0.00147238	0.9611	0.381949	3.68426	1.46314	0.673649	0.263563	3.84132	1.48237	3.27535
62	0.00994068	6.33334e-05	2.9475	0.0172978	10.8798	0.106393	1.91057	0.016515	2.02033	0.0175334	0.0632721	0.000455516	24.8867	0.145563	34.4991	0.572177	257.492	7.44758	70.0286	0.761845	151.053	2.56464	80.0272	1.26297	435.334	8.66901	0.012896	0.000957745	0.0310456	0.00450414	6.42056	0.123072	7.60818	1.63201	0.256485	0.0468036	0.00339793	0.000408069	0.0853469	0.00525031	0.0179872	0.00129764	0.0151563	0.00156595	0.0115053	0.00117269	0.187225	0.00710459	1.71891
63	0.0174411	0.000111119	2.9199	0.0171359	10.9899	0.107469	1.97978	0.016608	2.08424	0.018088	0.0539059	0.000388085	24.9867	0.146147	32.1132	0.46608	306.128	3.953	68.5435	0.75039	168.91	2.3657	78.8923	0.992929	391.042	6.41382	0.00590444	0.000637142	0.0284869	0.00126398	6.0968	0.105571	120.913	5.10688	0.535834	0.0367317	0.000895792	0.000190044	0.0048816	0.00122389	0.00166828	0.000264165	0.00722306	0.000650841	0.00584659	0.000754959	0.186361	0.0088287	1.8302
64	0.000403778	3.16694e-06	2.51424	0.0147552	10.9063	0.106652	1.82376	0.018852	1.95435	0.0169608	0.125573	0.000904036	26.0259	0.152226	35.9972	0.564927	282.768	11.4571	56.5293	0.690457	118.273	1.91301	59.2568	0.900859	285.463	5.46983	bdl		0.0114138	0.000793702	11.7438	0.211188	255.348	37.2986	0.573852	0.114254	bdl		0.00196635	0.00078561	0.000981856	0.000204939	0.0073375	0.000781556	0.00346893	0.000533054	0.145212	0.00827259	1.98505
65	bdl		2.52085	0.014794	10.839	0.105994	1.84448	0.019711	1.99101	0.017279	0.116049	0.000835475	25.755	0.150642	37.6997	0.584027	283.187	3.81006	52.9016	0.587463	57.7052	0.938457	60.6909	0.848268	291.931	5.12744	bdl		0.00360296	0.000439834	10.9446	0.199292	11.3321	2.4551	0.41028	0.0311085	0.000558164	0.000149002	0.00306625	0.000976642	bdl		0.00274825	0.000335631	0.00401761	0.000575198	0.15424	0.00669192	2.1488
66	0.0227416	0.00014489	2.96944	0.0174266	10.9032	0.106622	1.92247	0.017413	2.02049	0.0175348	0.0561938	0.000404556	24.9634	0.146011	38.192	0.554307	502.653	31.5547	75.4522	0.799307	141.834	1.97338	81.9885	1.0319	419.349	6.10246	0.0773294	0.0128525	0.839447	0.224732	6.21322	0.115061	265.831	16.481	1.83329	0.243558	0.00804866	0.000720358	1.03816	0.324169	0.0105562	0.000679398	0.0140001	0.0015754	0.0104751	0.00111441	0.188071	0.00821157	1.6728
67	0.0266077	0.00384848	1.63826	0.0096144	10.7743	0.105361	2.3705	0.019885	2.50365	0.0217279	0.141942	0.00102188	27.3859	0.160181	74.9574	1.08791	519.382	32.4233	101.298	1.0731	131.561	1.84271	49.7666	0.626356	231.701	3.67788	0.361032	0.0146064	0.0334855	0.00494169	204.875	3.60895	92.7707	1.95808	2.32858	0.320494	0.0220315	0.00289512	1.12938	0.0340585	0.00417357	0.00095333	0.0129124	0.00139049	0.00755485	0.000711412	0.33603	0.0158012	4.1505
68	0.187343	0.0076402	1.85676	0.0108967	10.6342	0.103991	2.06286	0.017305	2.22027	0.0192685	0.125346	0.000902407	26.5356	0.155207	87.4706	1.26952	763.108	48.2647	90.4366	0.958046	117.261	1.63148	52.2801	0.657992	334.834	5.48324	bdl		0.0242887	0.00115593	30.4739	0.622324	100.359	3.67279	5.13501	0.555596	bdl		0.00831628	0.00159146	0.0130976	0.00151492	0.0238513	0.00170455	0.00819695	0.000802112	0.244852	0.00844658	3.03375
69	0.00284151	1.81036e-05	2.06729	0.0121322	10.9081	0.106669	1.99034	0.019232	2.16933	0.0188265	0.13776	0.00099178	26.742	0.156414	75.5615	1.13034	529.79	14.4201	82.2485	0.931903	108.656	1.647	56.7333	0.764219	382.303	6.21462	0.0499219	0.00789202	0.147076	0.0144015	19.2453	0.341035	140.777	9.49688	1.38614	0.0795612	0.00260417	0.000342902	0.481674	0.0752918	1.67152	0.391899	3.64163	0.855127	0.427944	0.0998274	1.6801	0.346272	3.01467
70	0.0161507	0.000102898	2.18223	0.0128067	10.7744	0.105362	2.03291	0.023014	2.19902	0.0190842	0.133688	0.000962462	26.0361	0.152285	54.4095	0.852333	447.317	20.2994	81.2153	0.970706	122.118	1.85052	62.1915	0.876124	368.49	5.96981	1.08422	0.0448502	0.101867	0.0150874	25.9549	0.446815	29.498	2.65858	1.14319	0.167235	0.0774057	0.00592955	8.67333	1.29547	0.00671905	0.000526134	0.0111385	0.00259291	0.0070043	0.000955162	0.215709	0.01054	2.73614
71	bdl		2.82435	0.0165751	10.8768	0.106363	2.01536	0.016906	2.14309	0.0185988	0.0618738	0.000445449	24.918	0.145746	30.7925	0.446912	776.896	98.7749	56.6105	0.632287	185.472	2.60916	75.7157	0.952948	351.396	5.81793	1.50755	0.108094	0.0531453	0.00809958	6.58973	0.118126	195.268	25.7034	2.09365	0.332957	0.104256	0.0098628	11.63	0.714926	0.0160632	0.00247793	0.0237506	0.00269759	0.00857364	0.00100159	0.210521	0.0113186	2.06772
72	0.00377016	2.40202e-05	1.90556	0.0111831	10.7651	0.105271	2.36512	0.01984	2.49588	0.0216604	0.138138	0.000994498	26.8037	0.156775	45.846	0.665395	333.863	2.18924	105.216	1.11461	114.771	1.66174	58.6188	0.737769	349.366	5.81405	0.0221759	0.00127619	0.0150762	0.000915191	162.232	2.85036	456.559	17.208	0.0310979	0.00201586	bdl		0.0113688	0.00189291	0.000642022	0.000165592	0.00803767	0.000580573	0.00686182	0.000669455	0.241459	0.0124928	3.52107
73	bdl		2.06054	0.0120926	10.971	0.107285	2.23944	0.019398	2.38659	0.020712	0.13272	0.000955495	26.705	0.156198	52.6165	0.763659	285.877	2.26831	93.9538	1.10996	138.421	2.10601	61.3874	0.772614	354.22	5.59429	0.0143312	0.00100078	0.0265819	0.00121313	76.064	1.41586	53.7428	9.59734	0.00414777	0.000560032	0.0018943	0.000286413	0.0534605	0.0156458	1.92742e-05	2.82362e-05	0.00408269	0.000405507	0.0057603	0.000713551	0.270203	0.0101342	3.70955
74	0.0133754	8.52166e-05	1.68312	0.00987766	10.9431	0.107012	2.39251	0.02007	2.52467	0.0219103	0.136942	0.00101032	27.2483	0.159376	44.0111	0.638764	343.522	5.38219	102.597	1.08687	110.02	1.53234	50.7327	0.638516	251.652	3.67344	0.454434	0.047159	1.44835	0.0294976	188.177	3.18618	78.7388	4.10258	0.0470282	0.00784918	0.0230673	0.00282614	10.558	1.0418	0.00463921	0.000606154	0.00813356	0.000906672	0.00472769	0.000531288	0.251996	0.0119291	3.6366
75	bdl		1.75062	0.0102738	11.0064	0.107631	2.37903	0.019957	2.53478	0.021998	0.130552	0.000939881	27.3338	0.159876	43.7738	0.635319	432.924	29.8918	104.498	1.10701	123.513	1.72116	52.5509	0.661399	284.997	4.34837	0.0357426	0.0037585	0.0351985	0.00140592	137.28	2.40461	34.9357	3.08624	0.479851	0.142859	0.00544157	0.000545012	0.0176331	0.00231914	0.00762186	0.00103177	0.00537957	0.000859508	0.00694776	0.000640186	0.277502	0.0123381	3.73862
76	0.0101538	6.4691e-05	1.79256	0.0105199	10.9415	0.106996	2.28036	0.019129	2.45479	0.0213039	0.12647	0.000910499	27.2427	0.159343	50.7238	0.73619	318.053	2.13784	101.12	1.07122	111.794	1.56768	53.2773	0.670542	255.074	3.8226	0.304887	0.0371302	0.327437	0.0319841	83.801	1.48783	8.66993	0.708472	0.0209946	0.00594406	0.0150729	0.00260017	4.89462	0.543004	0.00173853	0.000266546	0.00493338	0.000759612	0.00599329	0.000994356	0.245668	0.00807758	3.61024
77	0.0278115	0.000177191	1.95984	0.0115016	11.0647	0.108201	2.14191	0.019349	2.32889	0.0202112	0.133632	0.000962056	27.1095	0.158564	60.0108	0.909394	279.44	2.41903	93.989	1.07483	142.537	2.02269	53.0637	0.688221	312.569	4.92156	0.0189291	0.00114026	0.0246006	0.00114706	21.7485	0.781035	90.4103	10.8987	0.0212112	0.00331148	bdl		0.0291875	0.00700412	0.000818462	0.000181317	0.00631687	0.000976471	0.00487181	0.000627623	0.212873	0.0123155	2.7899
78	0.000626006	4.33869e-06	2.45632	0.0144153	11.0307	0.107868	1.7574	0.025925	1.89718	0.0164647	0.16369	0.00117846	26.3276	0.153991	42.202	0.726436	633.102	53.6947	57.0397	0.807939	58.9868	1.04129	65.7715	1.01274	413.569	7.21211	0.00534855	0.000598117	0.0289809	0.00125749	13.9985	0.273355	29.611	1.55501	2.94079	0.337679	bdl		0.0645177	0.0165435	0.000793078	0.000179383	0.00524993	0.000901196	0.00348782	0.000397676	0.133277	0.00845372	1.68114
79	0.0826894	0.000526825	1.48131	0.00869331	10.7002	0.104636	2.3801	0.019966	2.50647	0.0217523	0.354317	0.00291044	27.3346	0.182679	42.3425	0.645741	427.339	15.9227	50.0619	0.57308	113.831	1.74001	29.9243	0.477985	272.712	5.4914	0.0180401	0.00114139	0.0129326	0.00084207	99.2474	1.68044	307.953	12.0565	0.167101	0.0481113	bdl		0.00856281	0.00163581	0.00297255	0.00035575	0.0157637	0.00120494	0.00980027	0.00101383	0.36024	0.0126497	3.48452
80	0.0188954	0.00242215	2.33065	0.0136778	10.8551	0.106151	1.78395	0.015739	1.89494	0.0164452	0.144835	0.00104271	26.0523	0.152381	68.6207	1.00714	331.199	33.4446	59.1337	0.626436	176.563	2.49578	56.8572	0.716327	270.199	4.32651	1.96627	0.0652589	0.528166	0.0410017	15.8773	0.354459	569.725	19.4324	0.452324	0.0793964	0.0697272	0.00573315	47.6012	0.691885	0.00531033	0.000476434	0.0270359	0.00306231	0.00573827	0.000832994	0.154096	0.00737494	1.9578
81	0.224934	0.0210627	1.44027	0.00845246	10.4759	0.102443	2.30147	0.019306	2.44811	0.0212459	0.194421	0.0013997	26.899	0.157333	32.3911	0.606166	1000.02	26.8168	131.832	2.29646	167.418	2.34097	38.2085	0.480887	178.049	2.63999	0.0202148	0.00119408	0.0326916	0.00632735	95.2173	1.69397	78.1109	3.60948	2.49766	0.0703421	0.00574151	0.000564461	0.0401101	0.00496739	0.012426	0.00108402	0.0369976	0.00238135	0.0126635	0.00108055	0.299605	0.0145378	3.04405
82	0.00916364	5.83828e-05	2.11568	0.0124162	10.8868	0.106461	2.28244	0.019307	2.45011	0.0212632	0.143083	0.0010301	26.307	0.15387	43.7846	0.63642	305.966	2.00631	100.756	1.06737	189.01	2.72471	64.2864	0.8091	417.662	6.40325	0.738035	0.0311811	0.16581	0.0102236	113.671	2.17337	3.59547	0.887025	0.00781954	0.0014753	0.0158525	0.00117658	36.6061	1.04618	0.00746062	0.000551232	0.00371076	0.000380584	0.00713461	0.000691194	0.22335	0.0110485	3.36517
83	0.0128947	8.21537e-05	1.6779	0.00984701	11.0068	0.107635	2.36817	0.019866	2.4944	0.0216476	0.160149	0.00115296	27.5182	0.160954	33.619	0.487936	556.774	44.3763	109.123	1.156	118.388	1.64716	50.748	0.638708	313.51	4.56227	0.221593	0.0159384	0.0614446	0.00824239	139.841	2.63824	164.067	7.52443	5.60489	0.954067	0.0120434	0.000951047	0.831264	0.0691423	0.00957622	0.000626706	0.0139917	0.00141277	0.0102632	0.000726879	0.29764	0.00909518	3.43097
84	0.00454393	2.895e-05	2.51725	0.0147729	10.8745	0.106341	1.87159	0.017038	2.00956	0.0174399	0.124836	0.000898733	25.84	0.151139	51.6002	0.814002	213.381	3.84997	56.0846	0.647035	198.248	2.81436	65.2717	0.83617	371.308	5.97561	bdl		0.00911017	0.000698394	11.2523	0.212482	4.10755	0.917155	0.0753029	0.0100065	bdl		0.00647469	0.00141153	0.000177799	8.61088e-05	0.00230215	0.000305142	0.00349419	0.000455299	0.174912	0.00855114	2.05859
85	0.0213598	0.00267771	2.88307	0.0169197	10.8426	0.106029	1.8352	0.022651	1.98464	0.0172236	0.0641015	0.000461487	24.9361	0.145852	47.2906	0.816966	347.997	21.5686	76.8237	1.0001	244.858	3.82754	79.7557	1.12771	451.953	7.86991	0.00936322	0.000801603	0.0418952	0.00561167	5.79682	0.125018	44.9528	2.31127	0.704907	0.0856919	0.000915086	0.000191118	0.354692	0.0851747	0.00467252	0.00109494	0.0111694	0.00106726	0.00653983	0.000610484	0.162842	0.00873045	1.63312
86	-0.000253154	2.27848e-06	2.45641	0.0144158	10.9075	0.106664	1.83682	0.016986	1.97366	0.0171283	0.1273	0.00091647	26.0291	0.152244	37.3773	0.567499	490.228	5.47271	53.0786	0.623453	152.624	2.49693	60.1274	0.822173	289.813	4.99245	bdl		0.00380455	0.00044681	12.1772	0.23292	53.2162	2.15703	2.09325	0.0557448	bdl		0.00689008	0.00145112	0.00168904	0.000264872	0.00728593	0.000952849	0.00444286	0.000382433	0.174801	0.0109073	2.05801
87	0.00619505	3.94695e-05	1.7911	0.0105113	10.8752	0.106348	2.24991	0.018874	2.38033	0.0206577	0.132888	0.000956704	27.269	0.159497	90.934	1.31979	299.46	1.96678	95.2886	1.00945	95.8502	1.35995	52.744	0.66383	266.837	4.29971	0.0283334	0.00144069	0.0108485	0.000764089	125.384	2.24476	107.02	3.6257	0.0078764	0.00106911	0.00022521	9.28927e-05	0.0105833	0.00180781	0.000255429	0.000103291	0.00554134	0.000861297	0.00607359	0.000450144	0.305557	0.00937977	4.01192
88	0.00589936	3.75856e-05	1.80366	0.0105851	10.9754	0.107328	2.30164	0.019308	2.44022	0.0211774	0.136883	0.000985464	27.0999	0.158508	86.4254	1.25435	343.064	6.74821	97.6658	1.03463	94.3691	1.42081	53.6641	0.67541	311.927	4.53923	0.0407645	0.00488968	0.431406	0.0557526	167.423	3.02333	293.369	11.0609	0.126936	0.0251945	0.00609859	0.000586291	1.7505	0.360603	0.00150442	0.000247836	0.0107732	0.00124367	0.00736488	0.000793822	0.351367	0.0143205	4.47738
89	0.011426	7.27965e-05	1.37816	0.00808796	10.8864	0.106457	2.33183	0.019561	2.48514	0.0215672	0.486765	0.00350437	27.7591	0.162363	79.6813	1.15647	386.52	2.53453	36.8304	0.390165	77.6892	1.11075	22.3413	0.295902	139.838	2.29475	0.0742271	0.00578843	0.198124	0.0441447	124.408	2.23851	85.7547	6.55978	0.0269564	0.00328714	bdl		1.70416	0.146281	0.00229101	0.000306803	0.0113393	0.00111262	0.00911432	0.000577646	0.343363	0.0123798	3.16518
90	0.0117486	7.48519e-05	1.75378	0.0102923	10.7962	0.105575	2.29326	0.019238	2.40759	0.0208942	0.133532	0.000961341	27.1275	0.158669	158.311	2.29768	562.152	55.8381	94.2228	0.998154	144.673	2.02451	52.9152	0.665985	322.939	5.08325	0.0758452	0.00826804	0.0124731	0.000821811	150.003	2.87847	259.466	28.6918	0.864879	0.222559	0.0012466	0.000228069	0.19093	0.013995	0.007514	0.000565178	0.015836	0.00301181	0.00913118	0.000807939	0.359689	0.0135752	4.63726
91	0.00899109	5.72835e-05	1.56078	0.00915967	10.984	0.107411	2.40343	0.020162	2.53068	0.0219624	0.161198	0.00116051	27.7093	0.162072	94.0594	1.36515	407.1	2.66948	104.032	1.10207	118.388	1.64717	44.3578	0.558282	210.193	3.06153	0.0241205	0.00130686	0.0265585	0.00120279	157.444	2.93555	20.4887	1.76304	0.00444306	0.000574517	bdl		0.00572908	0.00131217	0.00393799	0.000402048	0.00693278	0.00083298	0.0107665	0.00077394	0.477037	0.0130423	5.19587
92	0.00515779	3.2861e-05	1.91753	0.0112533	10.8207	0.105815	2.04569	0.019219	2.21919	0.0192592	0.138743	0.000998855	27.0338	0.158121	117.195	1.7524	401.609	16.8895	83.3485	0.898503	103.568	1.54055	50.808	0.642626	215.866	3.35124	bdl		0.00596	0.000554639	19.6069	0.348947	14.1651	1.58039	0.697438	0.0786487	0.000196323	8.5355e-05	0.0067602	0.00142206	bdl		0.00276305	0.00032987	0.00418929	0.000657425	0.188055	0.00846647	2.56727
93	0.0107293	6.8358e-05	2.91653	0.0171161	10.9242	0.106827	1.92202	0.016898	2.03708	0.0176787	0.0547257	0.000393987	24.9655	0.146024	59.4358	0.871403	229.198	1.50292	71.1388	0.753613	180.242	2.53172	79.9938	1.00679	411.575	6.46695	0.268427	0.0505271	0.132104	0.0121429	5.8512	0.103565	31.5253	5.86627	0.00607806	0.00127662	0.0158616	0.00118521	5.50981	0.721469	0.00560471	0.00100119	0.00766428	0.000688876	0.00473547	0.000569012	0.189514	0.0108148	1.716
94	0.00342176	2.18005e-05	2.51668	0.0147695	10.8529	0.106129	1.86153	0.015616	1.96519	0.0170549	0.120066	0.000864392	25.8005	0.150907	64.2324	0.947697	241.252	10.763	54.9285	0.581888	204.615	2.8633	62.4545	0.786045	296.599	4.59912	0.000955471	0.000251814	0.00776245	0.000634991	12.3348	0.210935	159.184	8.11204	0.120061	0.0341671	0.00397432	0.000443123	0.00700183	0.00144886	0.000499666	0.000142449	0.00584626	0.000835257	0.00399901	0.000620348	0.170357	0.00857974	2.08378
95	bdl		2.83328	0.0166276	10.8502	0.106103	1.98606	0.02551	2.12705	0.0184596	0.05984	0.000524927	24.8799	0.145523	45.8909	0.769204	218.476	2.26353	55.8023	0.701619	150.541	2.40409	76.7755	1.04303	356.779	5.81147	0.0856311	0.00648852	0.0152474	0.000899617	6.62841	0.133513	60.1873	8.20989	0.00749566	0.000749719	0.00424633	0.000462852	0.445638	0.0256102	0.00579853	0.00061933	0.00786481	0.00112645	0.00813035	0.000742768	0.205678	0.00837507	2.15431
96	0.0107192	6.82933e-05	2.8164	0.0165285	10.9965	0.107534	2.03792	0.022006	2.15723	0.0187214	0.0633832	0.000481608	25.0004	0.146228	50.407	0.804972	324.68	8.74872	59.3659	0.753522	157.136	2.49431	75.8675	1.04861	343.742	5.49134	bdl		0.00230404	0.000342296	6.98288	0.121996	9.73099	0.831268	0.289847	0.0380893	bdl		0.00118682	0.000593474	0.0001818	8.557e-05	0.00355111	0.000694082	0.00506127	0.000563723	0.181244	0.00972046	2.13378
97	bdl		2.84786	0.0167131	11.0366	0.107926	2.02485	0.016986	2.14872	0.0186476	0.0620748	0.000446896	25.0202	0.146344	39.43	0.627568	198.494	1.35695	55.0948	0.583649	211.947	2.98323	76.7947	0.966529	352.943	5.54841	bdl		0.0075841	0.0006238	6.76178	0.119984	136.365	13.6702	0.0113536	0.00148249	0.001451	0.000243376	0.00205167	0.000778808	0.00078474	0.000177511	0.00801244	0.000563161	0.0048574	0.000556522	0.182497	0.0089023	2.13191
98	0.0176148	0.000112226	2.89935	0.0170153	10.8363	0.105967	1.88304	0.020915	2.00487	0.0173992	0.0516173	0.000371608	24.9659	0.146026	63.3052	1.02822	288.886	4.29281	84.7743	1.08644	156.393	2.45933	81.616	1.08727	429.171	7.07761	0.00363779	0.000494411	0.000331137	0.000130259	6.3114	0.116573	80.6932	3.19019	0.135783	0.0232222	bdl		bdl		0.000737096	0.000173474	0.00682331	0.000713404	0.00512328	0.000781192	0.171694	0.00918035	1.66982
99	0.00409364	2.60811e-05	2.93088	0.0172003	10.881	0.106405	1.88487	0.015812	1.99558	0.0173186	0.0504318	0.000363074	25.1118	0.146879	59.7559	0.867278	237.23	1.92672	82.2144	0.870942	156.292	2.19542	83.2679	1.048	426.702	7.07764	0.0642425	0.00225407	0.00843046	0.000667132	6.2332	0.105539	149.349	20.132	0.0141763	0.00167581	0.00418537	0.000460407	0.900064	0.201287	0.00526809	0.000468257	0.00964698	0.000736155	0.00625399	0.000763282	0.191282	0.00935232	1.7033
100	0.01356	8.63926e-05	2.70474	0.0158732	10.9193	0.106779	1.71772	0.024196	1.86398	0.0161765	0.101747	0.000740945	25.5925	0.149691	50.9952	0.929143	111.431	1.28079	40.4741	0.588975	66.3212	1.27869	70.1256	1.05471	356.813	6.49838	0.0787377	0.0146834	0.0363739	0.00673801	8.5312	0.177842	0.898175	0.139039	-0.000491858	0.000188159	0.00361058	0.000414958	1.04403	0.186837	0.000721347	0.000169845	0.00136159	0.000229639	0.00347286	0.000331881	0.118483	0.00554584	1.31895
111	0.356796	0.0139182	1.6366	0.0100794	10.4808	0.102111	2.18853	0.018599	2.31974	0.0199787	0.122052	0.000866411	26.444	0.162221	51.954	0.754045	450.675	19.5061	112.763	1.10092	134.709	1.68795	53.7118	0.694292	245.842	3.94244	0.0176182	0.00109654	0.037515	0.00356166	112.269	2.25336	179.478	9.91644	0.309843	0.0396628	0.00317771	0.000382882	0.109693	0.0119812	0.00702411	0.000969805	0.0218678	0.0014192	0.00929224	0.00077788	0.267551	0.0116307	3.62573
112	0.00369908	2.35944e-05	2.91632	0.0179609	10.8726	0.105928	1.85945	0.021255	2.00262	0.0172476	0.0593623	0.000611357	25.0369	0.153589	58.552	0.972467	229.325	2.31835	76.7556	0.860578	194.421	2.59359	81.4749	1.08761	429.937	7.46744	1.22036	0.216217	0.133696	0.033773	6.23947	0.142903	39.9102	8.218	0.00515338	0.000624444	0.0357157	0.00595212	28.7334	5.47108	0.00336275	0.00037608	0.00332893	0.000367875	0.00633508	0.00074308	0.153566	0.0102642	1.56724
113	bdl		1.56866	0.009661	10.8642	0.105846	2.36636	0.02011	2.49692	0.0215047	0.139528	0.000990473	27.7305	0.170113	26.384	0.382929	431.714	3.03681	108.357	1.05791	98.3828	1.18059	50.0752	0.630241	192.212	3.24919	0.368131	0.0199598	0.0352509	0.00634517	146.036	3.03873	10.4952	0.690437	0.00554682	0.000654636	0.0185382	0.00241983	0.417861	0.0385962	0.00772871	0.00123163	0.0074969	0.000830069	0.0154391	0.000912854	0.526566	0.0194988	6.16135
114	0.00747048	4.76501e-05	2.55121	0.0157123	10.8799	0.105999	1.85477	0.016575	1.97425	0.0170033	0.103248	0.000732931	25.7837	0.15817	57.8622	0.880097	219.411	2.70058	33.6078	0.357944	137.795	1.76047	65.6251	0.828255	278.821	4.9187	1.53663	0.129147	0.0202782	0.00106337	12.4925	0.267926	107.663	6.30324	0.0182027	0.00119214	0.0892277	0.0095117	6.81873	0.394037	0.00635755	0.000523121	0.00439772	0.000452994	0.00481912	0.000454672	0.184172	0.00689105	2.21631
115	0.205284	0.00586076	2.33216	0.0143632	10.6603	0.103859	1.70705	0.023436	1.86814	0.0160893	0.138441	0.000982758	25.6021	0.157056	67.5656	1.11099	342.508	10.9918	29.6436	0.428687	136.953	2.2963	54.0539	0.840223	241.065	4.99391	0.252785	0.00799479	0.0210941	0.00106744	15.8499	0.332842	180.932	4.61175	1.12163	0.0676635	0.0147046	0.00111416	1.27759	0.041751	0.00534017	0.000470721	0.0141911	0.00134624	0.00410936	0.000617602	0.164212	0.010822	1.94879
116	0.266879	0.00481703	2.21271	0.0136275	10.5825	0.103101	1.72728	0.014679	1.83949	0.0158426	0.15324	0.00108781	25.6658	0.157447	80.5026	1.16839	247.728	9.67581	34.1792	0.4083	119.864	1.54029	50.7727	0.64465	255.973	4.28875	0.00169398	0.000340292	0.0293642	0.00128199	20.1149	0.389863	94.2524	8.56826	0.370852	0.0709478	0.00129066	0.000231961	0.0389328	0.00573279	0.00456784	0.000438823	0.0178539	0.00136448	0.00724131	0.000985472	0.169852	0.00767631	2.01636
117	0.00513421	3.27483e-05	1.60177	0.00986489	10.7941	0.105164	2.41522	0.020525	2.54925	0.0219554	0.145079	0.00102988	27.6075	0.169358	25.2963	0.379234	430.082	3.02533	67.2487	0.65656	130.174	1.55252	50.1842	0.631612	177.473	2.76725	0.0645191	0.0077818	0.0124954	0.000831324	421.04	8.27357	3.86719	0.292931	0.00232564	0.000424945	0.00393302	0.000449138	bdl		3.88394e-05	4.08451e-05	0.00503234	0.000863927	0.0106119	0.000770772	0.527231	0.0167189	6.56418
118	0.0065006	4.14637e-05	1.50957	0.00929703	10.7095	0.104338	2.448	0.020804	2.56424	0.0220845	0.212779	0.00151046	27.6346	0.169524	41.9307	0.608569	471.821	6.86873	52.5185	0.512746	79.1369	1.10288	36.6019	0.460668	150.776	2.39176	0.0470638	0.00191858	0.0118369	0.000806103	329.929	6.39463	7.37367	1.75461	0.272132	0.071527	0.0019155	0.000292048	0.00387736	0.00110308	bdl		0.00572915	0.000588345	0.0107284	0.000794294	0.469629	0.0166771	5.38171
119	0.00525116	3.34942e-05	1.52769	0.00940864	10.9797	0.106971	2.46187	0.022725	2.59232	0.0223264	0.202722	0.00143907	27.8775	0.171014	49.2212	0.731462	449.961	3.41386	50.2216	0.493773	82.4787	1.14783	38.6027	0.485849	150.604	2.29254	0.229054	0.0138944	0.0462335	0.00803724	387.851	7.51726	1.97286	0.217826	0.00597272	0.000674243	0.0127148	0.00100062	0.113214	0.0144416	0.00560077	0.000487385	0.00867631	0.000994173	0.0127914	0.00129661	0.510497	0.0168716	5.80785
120	0.0080191	5.11494e-05	1.58237	0.00974541	10.9757	0.106932	2.43803	0.020719	2.56567	0.0220968	0.15939	0.00113147	27.8416	0.170794	42.9762	0.623743	437.12	3.07484	59.5304	0.581205	82.9785	0.998566	47.8866	0.602696	161.162	2.45108	0.769882	0.0506367	0.111417	0.0205899	424.66	8.23068	68.0559	19.1346	0.00629001	0.000695994	0.0346671	0.00502713	1.6061	0.103423	0.0266504	0.00182957	0.0242597	0.00182611	0.0232266	0.00105129	0.621748	0.0181905	7.09324
121	0.00554201	3.53494e-05	1.59502	0.00982335	10.8337	0.105548	2.36007	0.020057	2.47104	0.0212818	0.168986	0.00119959	27.6311	0.169503	34.195	0.496295	637.887	13.1252	57.5506	0.561875	174.377	2.07971	46.246	0.582047	238.905	3.76981	0.339958	0.0241755	0.0227264	0.00113402	327.541	6.43492	54.6788	2.02077	1.61149	0.0715394	0.0152703	0.00115885	1.56876	0.133388	0.0122718	0.00137022	0.0176871	0.00153238	0.0136463	0.00103943	0.500957	0.0170584	5.71251
122	0.00431051	2.74943e-05	1.88475	0.0116077	10.8593	0.105798	2.0651	0.01755	2.22021	0.0191216	0.141716	0.001006	26.9854	0.165542	44.2694	0.659905	372.35	12.7909	49.9105	0.487284	225.651	2.8536	50.1249	0.630866	232.228	3.70777	1.14403	0.0861861	0.0493969	0.00512424	28.1585	0.560301	190.197	5.34426	0.548126	0.143929	0.0631208	0.00623088	5.70751	0.436851	0.0129145	0.00115403	0.0113892	0.000944919	0.0105214	0.00090359	0.272604	0.0121525	3.26453
123	0.00439897	2.80586e-05	2.42447	0.0149317	11.009	0.107257	1.83472	0.019013	1.97503	0.01701	0.13493	0.000957835	26.3275	0.161506	62.9907	0.964163	236.136	9.20402	31.5852	0.324417	210.941	2.60406	59.4227	0.748681	247.547	3.84972	0.00499195	0.000582218	0.0119694	0.000796116	15.9018	0.333168	149.976	14.3631	0.0511003	0.00200299	0.00172976	0.0002712	0.00169371	0.000715214	0.000332881	0.000117135	0.00430834	0.000573651	0.00521877	0.000503676	0.177929	0.00966238	2.41098
124	0.122308	0.0127471	1.73458	0.0106828	10.6852	0.104102	2.12484	0.018058	2.25103	0.019387	0.135834	0.000964247	26.9495	0.165321	55.6026	0.823151	442.449	7.93846	65.2253	0.671748	105.046	1.28861	53.3854	0.671902	255.79	4.02821	0.0196705	0.00118782	0.0252578	0.00299061	78.5884	1.73632	261.927	18.5257	0.831217	0.0597271	0.00103782	0.000205984	0.0690132	0.011061	0.00748056	0.000854324	0.0289733	0.00182992	0.0106486	0.000755674	0.300968	0.0108768	3.64209
125	0.0350274	0.00022342	2.77112	0.0170666	10.9103	0.106295	1.93586	0.020074	2.07095	0.017836	0.0668392	0.000474474	25.0063	0.153401	73.4336	1.17186	272.02	15.1149	43.8452	0.478918	133.054	1.69772	75.0805	0.95272	348.787	5.18691	0.235209	0.0106874	0.0512913	0.00538933	9.57996	0.24292	273.653	28.2998	0.796158	0.141723	0.00696306	0.000646243	1.13016	0.036772	0.0143712	0.00181355	0.0278608	0.00207513	0.00797281	0.000931549	0.189418	0.00975701	2.03242
126	0.0160551	0.000102407	1.51029	0.00930148	10.8134	0.105351	2.50069	0.021252	2.61461	0.0225184	0.247313	0.00175561	27.5923	0.169265	21.509	0.312174	420.25	3.17681	62.0742	0.60604	161.429	1.92528	32.7059	0.411632	198.582	3.24894	1.01024	0.0677542	0.0962334	0.0051211	352.791	6.83773	18.5638	3.79554	0.0572702	0.0184283	0.0500941	0.00496195	3.21959	0.194064	0.0107282	0.00109735	0.0105069	0.0013734	0.0113939	0.000992703	0.355864	0.0178661	4.00969
127	0.00643351	4.10358e-05	1.5979	0.00984108	10.8963	0.106159	2.47054	0.020996	2.58917	0.0222993	0.164642	0.00116875	27.5276	0.168868	22.1311	0.321204	1031.18	21.2662	63.1714	0.616753	227.193	2.73681	46.8177	0.589242	177.235	2.98733	0.753956	0.0495662	0.0329546	0.00137315	320.012	6.20241	182.784	4.97488	3.6953	0.127545	0.0317396	0.0036196	1.4268	0.0830113	0.0136498	0.00116411	0.0353236	0.00197482	0.0162452	0.00121147	0.464822	0.0168265	5.29291
128	0.00669302	4.26911e-05	2.7056	0.0166631	10.9756	0.106932	1.94593	0.024557	2.08731	0.017977	0.0747862	0.000530887	25.3791	0.155688	64.2132	1.10878	211.824	1.58409	40.5574	0.505473	107.475	1.35667	72.6539	0.95441	305.8	4.79023	0.0935613	0.00281203	0.00482467	0.000502134	9.55245	0.220563	23.713	0.982901	0.0273064	0.00758898	0.00731033	0.000666227	2.11088	0.47698	0.000810787	0.0001834	0.00575847	0.00070781	0.00431967	0.000521388	0.173188	0.0100194	2.09081
129	0.0657157	0.00547048	2.45868	0.0151424	10.9664	0.106842	1.78126	0.015138	1.92163	0.01655	0.125085	0.000887947	25.7047	0.157685	66.6826	1.01623	227.345	4.81646	28.4744	0.300596	116.147	1.66831	59.166	0.786421	243.497	4.25351	0.743472	0.0522334	0.10364	0.0279584	14.3158	0.294851	237.475	42.9075	0.442813	0.0369923	0.0430153	0.00512925	9.11836	0.521931	0.0127402	0.00143341	0.00873246	0.000955086	0.00666268	0.000631337	0.174641	0.0111316	2.11536
130	0.0231668	0.000147768	1.60433	0.00988068	10.8358	0.10557	2.42702	0.020626	2.54289	0.0219006	0.185666	0.001318	27.3747	0.16793	15.7396	0.22844	876.606	24.0353	66.9483	0.653627	147.783	1.78	42.2973	0.532349	234.803	3.89404	0.0848528	0.00978286	0.0287737	0.00307848	306.404	5.93866	137.291	9.99322	2.71375	0.0975679	0.00299671	0.000376824	0.125549	0.0120627	0.00706438	0.000875093	0.0196131	0.00162939	0.0100295	0.000849881	0.348592	0.0136425	4.51962
131	0.00630506	4.02165e-05	1.51273	0.00931655	11.062	0.107773	2.45414	0.025284	2.60098	0.022401	0.277539	0.00197017	27.7687	0.170347	16.3028	0.245804	567.333	6.97174	62.4756	0.677125	125.095	1.59858	30.2877	0.408172	184.677	2.91777	0.239153	0.042522	0.0567394	0.00181917	346.676	6.71921	46.63	5.31491	0.926678	0.0427862	0.00637625	0.000604644	1.18334	0.251076	0.00623617	0.00136275	0.0118376	0.00113115	0.0137993	0.00108204	0.464407	0.0167879	4.72391
132	0.0712783	0.00788144	1.68619	0.0103848	10.8025	0.105245	2.30848	0.019618	2.4211	0.0208517	0.142533	0.0010118	27.1966	0.166837	46.0851	0.668866	434.452	16.7873	59.1412	0.577405	130.421	1.55584	52.4031	0.659539	226.639	3.46265	0.0738085	0.00570437	0.0219114	0.00109551	228.979	4.43803	173.72	3.32833	0.516462	0.0646548	bdl		0.405115	0.0238664	0.0057018	0.000596725	0.0263741	0.00156215	0.00976487	0.00100493	0.363788	0.0132031	4.25441
133	0.421041	0.00639701	1.5241	0.00938652	10.5	0.102298	2.38361	0.020257	2.48803	0.0214282	0.171592	0.00121809	26.288	0.161263	41.012	0.595235	717.634	108.861	72.3774	0.706632	137.428	1.63903	40.3361	0.516413	177.049	3.00025	0.0488125	0.00640656	0.0556103	0.00870832	308.559	5.98043	120.991	10.0925	1.07322	0.301575	bdl		0.0337454	0.00536926	0.00374486	0.000389002	0.0166482	0.00112743	0.00948915	0.0011704	0.374086	0.0124854	4.31913
134	0.214562	0.00728985	1.3623	0.00839008	10.663	0.103886	2.29105	0.01947	2.42467	0.0208825	0.64381	0.00457024	26.9888	0.165563	43.5352	0.631856	360.016	2.53247	47.4218	0.47789	142.342	1.84007	15.5511	0.216213	226.871	3.93829	0.0456282	0.00582124	0.0408167	0.00506688	234.902	4.55283	2.26484	0.11322	0.0511666	0.0113505	0.00119003	0.000219684	0.0581347	0.00892494	0.0162251	0.00552205	0.032429	0.0100034	0.0117021	0.00269451	0.211589	0.00926214	1.89905
135	0.0310448	0.00408109	1.50881	0.00929237	10.922	0.106409	2.30762	0.020816	2.45116	0.0211106	0.255861	0.00181629	27.6276	0.169481	49.803	0.726232	353.212	2.97325	71.1621	0.772242	128.701	1.5944	31.0264	0.416705	175.002	2.78341	0.0695079	0.00537996	0.0222542	0.00363351	260.479	5.04855	19.5842	0.736107	0.00980487	0.00104976	bdl		0.104889	0.0108133	0.00438197	0.000658037	0.0123942	0.000956874	0.0084838	0.000846728	0.292799	0.0104617	3.28836
136	0.0252025	0.00322417	1.41158	0.00869358	10.8183	0.105399	2.40707	0.020456	2.53404	0.0218244	0.387734	0.00275242	27.4145	0.168174	43.5288	0.631763	759.158	21.2374	52.4193	0.575846	135.719	1.67345	21.4797	0.272969	150.579	2.27331	0.0341695	0.00157217	0.0249867	0.00115998	237.062	4.60262	170.98	5.5983	2.21765	0.127606	0.000385644	0.000120424	0.0268049	0.00283966	0.00425353	0.000695623	0.0192216	0.00200001	0.0103185	0.000816707	0.369947	0.0113947	3.39841
137	0.186653	0.0116742	1.43305	0.00882582	10.918	0.10637	2.30452	0.019585	2.44058	0.0210195	0.358246	0.0025431	27.388	0.168012	67.9382	0.986034	610.902	8.53696	60.452	0.900703	118.336	1.46073	23.2291	0.292359	139.755	2.09722	0.0380857	0.00165092	0.039229	0.00146217	244.516	4.73916	21.651	1.03398	3.06788	0.102053	bdl		0.0280664	0.00596542	0.00777132	0.000970472	0.018782	0.00144675	0.00811394	0.000676809	0.288925	0.0120598	2.9748
138	0.0345713	0.0050087	1.50878	0.0092922	10.9309	0.106496	2.3977	0.020376	2.51602	0.0216693	0.250746	0.00177998	27.6751	0.169772	55.5655	0.879057	385.016	2.70833	69.6412	0.71464	137.424	1.63899	32.7759	0.416387	183.259	3.20195	0.0902195	0.00622428	0.0215558	0.0040559	281.132	5.44885	1.19749	0.0204171	0.00991017	0.000866479	bdl		0.176221	0.0220568	0.00311848	0.000360486	0.00749058	0.000798222	0.00840772	0.0010266	0.345193	0.0123619	4.12487
139	0.0155584	9.92387e-05	1.55699	0.00958909	11.0188	0.107352	2.52014	0.021417	2.64795	0.0228054	0.190988	0.00135578	27.624	0.169459	24.1526	0.350543	385.056	2.70861	66.9568	0.65371	139.248	1.84882	39.4563	0.496593	193.345	3.18075	0.1119	0.0206988	0.0125607	0.000814999	285.859	5.54047	15.4685	1.86991	0.00681735	0.00129638	0.00241479	0.000328129	0.127218	0.00636343	0.0011341	0.000216381	0.00467284	0.000432625	0.00741976	0.000588856	0.330452	0.00982666	4.71491
140	0.373526	0.00748226	1.54567	0.00951941	10.5582	0.102865	2.23945	0.019032	2.36253	0.0203473	0.15388	0.00109235	26.4036	0.161972	62.8322	0.911926	552.192	11.3164	79.7518	0.778629	131.815	1.63456	42.7974	0.538643	192.452	3.09109	0.0506543	0.00193794	0.0790867	0.00657397	286.521	5.55633	74.2036	6.4517	1.29501	0.0814789	0.00509779	0.000515619	0.150954	0.0114763	0.0125459	0.00112217	0.0272829	0.00164064	0.01125	0.00111822	0.432757	0.0150281	4.64584
141	0.0114557	7.30699e-05	1.71753	0.0105778	10.9366	0.106552	2.39072	0.020317	2.53786	0.0218573	0.133739	0.000949375	27.2221	0.166994	29.3618	0.426148	341.772	2.40413	67.0021	0.654152	147.239	1.75605	54.7114	0.688591	187.379	3.16425	0.0347439	0.00159261	0.0169283	0.000949594	225.854	4.53123	11.2831	2.12929	0.00457971	0.000585068	0.000909154	0.000189721	0.00855611	0.00160383	0.00394895	0.000404348	0.00740668	0.000695652	0.0074481	0.00061156	0.284423	0.0111764	4.10429
142	0.00706654	4.50735e-05	2.09082	0.0128768	11.0513	0.107669	2.0056	0.020079	2.1674	0.0186668	0.172314	0.00122321	26.8166	0.164506	41.3995	0.635914	258.655	2.05685	46.5323	0.529268	195.642	2.48471	50.7533	0.6538	262.603	4.11127	0.248244	0.0156837	0.0319092	0.00424744	27.8051	0.578379	1.02627	0.0354122	-0.00214245	0.000394255	0.0300889	0.00314921	0.746612	0.0299238	0.00625772	0.000866577	0.00133425	0.000226654	0.00627182	0.000709676	0.178335	0.00970146	2.73783
143	0.0322128	0.00299649	2.22762	0.0137193	10.9568	0.106748	1.90189	0.017995	2.03204	0.017501	0.17515	0.00124335	26.4082	0.162	48.0079	0.729515	374.031	19.7351	38.4812	0.375698	186.812	2.42999	51.2667	0.652151	265.482	4.3579	bdl		0.0106093	0.00074146	22.9206	0.488692	47.8249	5.98064	0.966843	0.114477	0.00379698	0.000428917	0.00678454	0.00141822	0.00121543	0.000222266	0.00775161	0.000555012	0.00521846	0.000763331	0.202603	0.00844431	2.64734
144	0.00196131	1.25101e-05	2.5006	0.0154006	11.0133	0.107298	1.87276	0.019621	2.00455	0.0172642	0.119076	0.000845287	25.8862	0.158798	57.6683	0.89899	439.99	20.3299	35.3018	0.423938	167.255	2.31214	61.6713	0.821414	258.55	4.63534	0.00937829	0.000796718	0.00797268	0.000641701	14.7531	0.321533	156.576	11.34	1.98076	0.15827	bdl		0.012288	0.00191411	0.00304534	0.000353106	0.0138342	0.00138824	0.00453562	0.000381992	0.184155	0.0071903	2.1555
145	0.00299	1.90715e-05	2.78476	0.0171506	11.0571	0.107725	1.94879	0.021859	2.10471	0.0181268	0.0686385	0.000487246	25.3065	0.155242	54.7064	0.907737	239.271	5.17343	49.7696	0.633746	172.486	2.48631	74.0719	1.04624	364.464	6.47833	0.0248856	0.00131607	0.363748	0.0357583	7.74018	0.159314	8.6397	0.495507	0.0871051	0.0319745	0.0108044	0.00087398	0.827642	0.077241	0.0139526	0.00306549	0.0351566	0.0082013	0.00962368	0.00118721	0.192372	0.0128242	1.90943
146	0.00652457	4.16166e-05	2.74198	0.0168872	11.1701	0.108826	1.97088	0.018837	2.09804	0.0180693	0.0753992	0.000540383	25.2592	0.154952	54.5883	0.898466	346.469	12.6382	48.2553	0.471124	172.276	2.52545	70.9872	1.09818	342.092	6.32695	0.684018	0.0784917	1.43796	0.232161	8.89789	0.17529	15.675	0.761367	1.0241	0.103832	0.0564141	0.00894689	4.81338	0.58668	0.00678039	0.000591354	0.013041	0.0011362	0.00555463	0.000730846	0.184773	0.00693441	2.05853
147	bdl		2.67635	0.016483	11.2612	0.109714	1.88841	0.016048	2.00259	0.0172473	0.0951746	0.000708803	25.9201	0.159006	55.9771	0.812434	249.345	1.75397	42.6946	0.43219	197.573	2.35634	68.0758	0.856794	338.743	5.16713	0.00881446	0.000761095	0.0387035	0.00144707	10.8778	0.212523	29.1009	3.77018	0.00199617	0.000378845	bdl		0.00884159	0.00159949	0.00148906	0.000243127	0.00296885	0.000337099	0.00394048	0.000472178	0.164348	0.00896381	1.84149
148	0.0162816	0.000103851	2.72486	0.0167817	11.2469	0.109575	1.92805	0.021977	2.07749	0.0178924	0.0777693	0.000589513	25.6607	0.157415	55.0114	0.914196	292.727	10.2652	47.153	0.572092	192.351	2.69033	70.304	1.01017	345.272	6.42958	bdl		0.0480066	0.00778113	9.17849	0.194422	52.9636	10.1387	0.421132	0.00665575	0.00423887	0.000453638	0.0651653	0.0154498	0.0250011	0.00218439	0.0177389	0.00139755	0.013677	0.00150503	0.196348	0.00845589	1.89298
149	0.00967562	6.17155e-05	2.55072	0.0157092	11.0255	0.107418	1.93152	0.016415	2.0717	0.0178425	0.104919	0.000744792	25.807	0.158313	59.174	0.872074	240.21	2.80458	40.5914	0.3963	150.771	1.79817	62.7755	0.790084	269.083	4.29697	0.00377312	0.000499206	0.0069708	0.000596648	13.2443	0.26069	6.00931	0.745314	0.0524428	0.0020153	0.000759961	0.000170835	0.000593392	0.000417459	bdl		0.00304002	0.000593207	0.00466161	0.000441078	0.173532	0.0103647	2.19278
150	0.000324182	2.66767e-06	2.57771	0.0158755	11.2252	0.109363	1.93809	0.021454	2.05925	0.0177353	0.106174	0.000753701	25.9767	0.159354	60.8428	0.92325	225.575	3.75933	38.4002	0.395064	163.055	1.96578	62.7936	0.813504	262.422	3.90764	bdl		0.0301318	0.00126971	13.594	0.274726	1.76966	0.188676	0.037412	0.0102473	bdl		0.00505922	0.00121439	2.22507e-05	2.98196e-05	0.00214925	0.000524415	0.00435136	0.000497848	0.178281	0.00821385	2.28425
161	0.0036396	2.36378e-05	2.58199	0.0181848	11.2504	0.0861888	1.95921	0.017958	2.09908	0.0144089	0.108377	0.000739608	26.1241	0.165477	60.0376	0.985422	253.877	6.25469	40.0904	0.444609	161.685	2.35576	62.2125	0.953293	267.042	4.90043	0.00287303	0.000429399	0.0413352	0.00149572	13.661	0.194099	8.13435	1.02799	0.114369	0.0153161	0.000612808	0.000150529	0.00942932	0.00164511	0.00133029	0.000228831	0.00348871	0.000364425	0.00443932	0.000689281	0.172192	0.00970787	2.22375
162	0.00713487	4.63382e-05	2.61233	0.0183985	11.2869	0.0864685	1.97454	0.014423	2.08194	0.0142912	0.104382	0.000667959	26.0859	0.165235	64.8055	0.940567	306.744	6.32949	39.8988	0.38591	167.12	1.74329	64.3141	0.80945	267.933	3.89901	bdl		0.0418041	0.0147171	13.8353	0.191397	99.3452	14.8774	0.387455	0.0296308	bdl		0.0071124	0.0014505	0.00134034	0.00023331	0.0039407	0.000393667	0.00457913	0.000383173	0.184005	0.00959002	2.2628
163	0.00875577	5.68653e-05	2.7152	0.019123	11.1893	0.085721	2.01786	0.018674	2.13549	0.0146588	0.0744376	0.000502237	25.647	0.162455	52.8956	0.814953	3333.28	182.042	53.2069	0.655114	158.477	2.08117	70.7147	0.918572	298.515	4.85217	0.0128372	0.000943668	0.035245	0.00140411	9.32676	0.143518	222.764	28.1567	27.0264	1.38209	0.00327673	0.000394232	0.061661	0.00942404	0.0163752	0.000839367	0.0311688	0.00207887	0.00818185	0.000648414	0.217175	0.00873911	2.19344
164	0.000307069	2.64263e-06	2.59571	0.0182814	10.9995	0.0842668	1.90089	0.013763	2.00919	0.0137918	0.100022	0.000640054	25.8259	0.163588	55.6477	0.841944	287.691	6.95191	38.8258	0.359176	184.061	1.98607	64.4037	0.810577	274.757	4.58623	0.0101389	0.000843557	0.00710176	0.000615835	11.6114	0.168548	1.38616	0.0961624	0.483661	0.0436891	bdl		0.00436435	0.00115787	-8.42108e-06	1.88219e-05	0.00244217	0.000315361	0.00346617	0.000421171	0.187676	0.0120142	2.07065
165	0.00185568	1.20519e-05	2.80302	0.0197415	11.142	0.0853582	2.02061	0.02105	2.14995	0.014758	0.0675539	0.000432288	25.31	0.16032	55.6556	0.888519	383.468	11.5957	50.4278	0.605234	136.033	2.06561	74.139	1.05653	330.768	5.9533	bdl		0.0185201	0.00100172	8.2874	0.128731	16.6824	0.541535	0.984125	0.0527068	bdl		0.00824748	0.00158222	0.00251612	0.000324107	0.00710636	0.000725527	0.00481964	0.00047014	0.205704	0.012651	2.25445
166	0.00104454	6.78391e-06	2.68581	0.018916	11.0436	0.0846046	1.90326	0.015258	2.02681	0.0139128	0.0829804	0.000612637	25.7478	0.163093	57.0051	0.866419	417.621	35.753	45.2577	0.468675	189.252	2.32097	68.6718	0.909085	300.335	4.7716	0.00533618	0.000608565	0.00570722	0.000551633	10.1756	0.139398	119.874	9.06757	1.52529	0.313592	0.00280849	0.000362169	0.00582052	0.00133868	0.00188181	0.000282227	0.00846456	0.000872854	0.00612055	0.000825694	0.162411	0.00824616	1.87984
167	0.0047107	3.05942e-05	2.77188	0.0195222	11.1448	0.08538	2.00212	0.013711	2.11898	0.0145454	0.0688385	0.000440509	25.4262	0.161056	57.063	0.828194	245.861	6.24028	45.0835	0.417367	202.228	2.10951	73.2754	0.922235	316.378	4.94712	0.000172405	0.000108304	0.021204	0.00107941	8.71386	0.115318	75.0907	4.6925	0.339763	0.0669084	0.002476	0.000335213	0.000400698	0.000349638	bdl		0.00425238	0.000650586	0.00346967	0.00033865	0.194321	0.0102054	2.17766
168	0.0164563	0.00264872	2.86205	0.0201573	10.9695	0.0840364	2.06777	0.014131	2.20442	0.015132	0.0553998	0.000354512	25.0544	0.158701	57.3396	0.859906	365.664	5.28585	57.6025	0.532878	283.128	2.95341	77.7086	0.978032	358.57	7.26855	0.270589	0.0190976	0.00743663	0.000633204	6.97497	0.0958824	53.9449	3.82305	1.30328	0.0528124	0.0187014	0.00247439	2.08451	0.284878	0.00268963	0.000338765	0.00715793	0.000847222	0.00602448	0.000831791	0.211779	0.00874976	2.0939
169	0.0784902	0.00683631	2.28836	0.0161168	10.8838	0.0833805	1.75292	0.021405	1.93969	0.0133147	0.155387	0.000994348	26.2829	0.166483	58.4359	1.06949	295.364	13.5098	33.3448	0.476526	135.288	2.05649	52.0973	0.822781	219.24	4.02648	0.0134104	0.000961545	0.0180255	0.000980886	17.6248	0.304961	61.9864	3.51848	0.755978	0.065985	0.000789807	0.000175706	0.0282736	0.00292251	0.00234223	0.000310375	0.0102351	0.00116888	0.00504977	0.000615956	0.167081	0.0113981	2.03756
170	0.00403037	2.61757e-05	2.01493	0.0141911	11.0457	0.0846207	2.0332	0.017257	2.1676	0.0148792	0.157826	0.00100996	27.0995	0.171656	48.3492	0.7102	360.646	5.67088	48.2531	0.472896	144.462	1.50694	52.7136	0.666011	212.069	3.34802	0.650983	0.038307	0.0344517	0.00576954	26.4051	0.349442	60.0503	3.71412	0.758952	0.0342577	0.0287447	0.00265515	1.34781	0.0777861	0.0128995	0.00121061	0.012138	0.00141073	0.00889564	0.000593511	0.209319	0.0126465	2.84938
171	0.00585948	3.80551e-05	2.59929	0.0183066	11.1963	0.0857744	1.95294	0.016773	2.0984	0.0144042	0.100278	0.000653155	26.0151	0.164786	61.5517	0.926511	272.323	5.99164	42.8916	0.422117	143.746	1.90967	64.3701	0.826956	274.933	4.42298	bdl		0.034685	0.00138635	12.6236	0.18712	80.5049	4.99245	0.179453	0.0440854	bdl		0.00735332	0.00148213	0.00147424	0.000245752	0.00617306	0.000817236	0.00509686	0.000651577	0.159268	0.0107082	2.13204
172	0.00501182	3.25498e-05	2.06253	0.0145263	10.7964	0.0827108	2.17963	0.016193	2.32364	0.0159503	0.156923	0.00100417	26.3921	0.167174	29.9628	0.450337	507.703	21.3878	67.5455	0.634311	206.531	2.15734	58.5809	0.767192	367.326	6.5969	0.0587063	0.00908559	0.275053	0.0307974	210.162	2.78126	51.754	3.66567	1.94069	0.2243	0.00356022	0.000416246	1.30609	0.177158	0.0034883	0.000678547	0.0112857	0.0012323	0.00725706	0.000756325	0.302963	0.00998503	3.7613
173	0.0104767	6.8042e-05	2.42042	0.0170469	11.0064	0.0843194	1.84381	0.019438	1.99346	0.0136839	0.144631	0.000925513	26.4445	0.167507	69.2211	1.11663	275.294	8.52382	37.7296	0.447833	93.974	1.17265	57.0592	0.786317	316.469	5.61113	0.00258654	0.00041914	0.0075049	0.000629565	16.1878	0.263559	30.1976	2.99454	0.47969	0.00716589	bdl		0.00331493	0.00100199	0.00129883	0.000232379	0.0050833	0.000453675	0.00434729	0.000378066	0.16699	0.00914553	2.22298
174	bdl		2.1547	0.0151754	11.1419	0.0853576	1.98341	0.018528	2.15131	0.0147674	0.176938	0.00113226	27.0138	0.171112	73.9527	1.15773	314.381	15.3913	44.4187	0.421109	84.7539	1.00948	51.1476	0.664085	264.475	4.06567	0.00901893	0.000782805	0.0263441	0.00119617	25.5444	0.384859	33.7826	2.5741	0.656885	0.141972	0.00109074	0.000208855	0.014683	0.00209724	0.00180309	0.00027176	0.00705043	0.000531516	0.00470346	0.000753008	0.190791	0.00940402	2.6483
175	0.00877665	5.7001e-05	1.97843	0.0139339	10.984	0.0841476	2.05899	0.014071	2.21049	0.0151736	0.143686	0.000919473	27.31	0.172989	25.2309	0.431402	357.695	9.60963	61.243	0.566557	228.42	2.59034	54.7957	0.701975	293.316	4.80004	0.23361	0.0190345	0.0153129	0.000906425	21.8358	0.322069	50.631	2.77134	0.524293	0.0683757	0.0157937	0.00117921	0.522771	0.0297187	0.00520621	0.000466878	0.0100402	0.00116028	0.00730465	0.000673023	0.216605	0.00883877	2.74415
176	0.0153527	9.97096e-05	1.99561	0.014055	11.1404	0.0853458	2.08931	0.014278	2.23692	0.015355	0.147856	0.000946155	27.2898	0.172861	26.0293	0.383777	291.428	4.94073	60.3339	0.572101	247.837	2.63122	53.5298	0.680215	247.274	3.93204	0.0020011	0.000364762	0.0173195	0.000958516	23.5558	0.324961	29.2766	2.31491	0.243673	0.0313472	bdl		0.00356079	0.00102836	0.000266014	0.000103972	0.00484136	0.000669659	0.00521946	0.000850385	0.216591	0.00929823	2.83581
177	0.0101698	6.6049e-05	3.04285	0.0214306	11.0592	0.0847241	1.72266	0.013865	1.8433	0.0126531	0.0729643	0.00046691	25.1135	0.159075	73.1352	1.0947	166.804	4.67524	51.2875	0.541336	68.2365	0.782747	81.5436	1.09945	427.861	7.53904	0.283634	0.0537616	0.108725	0.00945224	8.43069	0.130374	4.06636	0.94403	0.104304	0.00290991	0.0226392	0.00372114	1.75029	0.284648	0.0020776	0.000293368	0.00366284	0.000683376	0.00264588	0.000341845	0.125139	0.00717503	1.10117
178	bdl		2.9262	0.0206091	11.1343	0.085299	1.91847	0.01311	2.01683	0.0138442	0.052542	0.000336225	25.4186	0.161008	69.8868	1.01432	204.675	7.20473	59.7032	0.552312	77.7348	0.843239	80.4397	1.0186	379.944	6.22259	0.00467389	0.000564828	0.00732859	0.000621898	6.23609	0.0825278	61.0021	7.14783	0.056942	0.0167241	0.0023505	0.000323951	0.0040234	0.00110354	0.00134498	0.000236278	0.00594849	0.000491227	0.00432573	0.000469148	0.165454	0.00846626	1.64486
179	0.00201207	1.30676e-05	1.90756	0.0134348	10.9562	0.0839347	2.08227	0.019287	2.23997	0.0153759	0.139195	0.000890733	27.2397	0.172543	66.8917	1.04033	257.325	3.15721	59.8545	0.56849	185.268	2.06627	55.8505	0.702927	270.54	4.20567	0.0305697	0.00148822	0.00920157	0.000695492	28.1488	0.428829	73.7609	8.95244	0.00753194	0.000747785	bdl		0.135714	0.0185696	0.00169337	0.0002641	0.00593709	0.000666714	0.00677845	0.00057046	0.24498	0.00900249	2.84864
180	0.0348569	0.00306039	2.53345	0.017843	10.9888	0.0841847	1.80803	0.012745	1.93989	0.0133161	0.111384	0.000712764	25.8977	0.164043	64.1092	0.930461	226.697	15.144	38.5986	0.357074	162.608	1.97663	61.4161	0.781295	269.653	4.56957	0.906197	0.0568394	0.142769	0.00869112	11.584	0.159815	9.02709	0.77628	0.41459	0.00647818	0.0641739	0.00607865	8.61711	1.06014	0.00582035	0.000723131	0.00316906	0.000525668	0.00674414	0.000600287	0.164018	0.00895581	2.06406
181	0.00207807	1.34963e-05	1.80799	0.0127336	11.1776	0.0856313	2.29978	0.015716	2.44843	0.016807	0.128994	0.000825456	27.5999	0.174825	43.597	0.632754	316.651	3.88275	74.2953	0.687302	197.663	2.06189	58.6311	0.737924	199.6	3.08586	0.0110986	0.000870114	0.024624	0.00115338	159.508	3.05762	2.06732	0.220486	0.00356567	0.000510812	bdl		0.000248365	0.000271437	0.000735165	0.000172914	0.00248795	0.000313422	0.00516038	0.000577498	0.282744	0.0113437	3.89795
182	0.398776	0.0145497	2.00525	0.0141229	10.6516	0.0816011	1.80364	0.016382	1.92731	0.0132298	0.142115	0.000972151	25.9215	0.178152	58.8851	0.895277	353.046	4.54828	54.13	0.714424	101.839	1.115	52.9418	0.688404	285.678	5.1711	0.239212	0.0234825	0.0540665	0.00560706	21.4093	0.316842	199.671	8.61382	1.07166	0.021076	0.0201853	0.00142688	0.390267	0.0256418	0.269801	0.0979453	0.650554	0.235406	0.0904566	0.0316831	0.571725	0.163822	2.12795
*BIR-1G is used as the primary reference material
[truncated: 29 more columns]

## Sheet: S3c_OM20-14
Table S3c. LASS-ICP-MS trace element analyses of garnet from sample OM20-14 (Session 2).
	Major elements (wt %)														Trace elements (μg/g)
Analyses	Na	2s	Mg*	2s	Al	2s	Ca (43)	2s	Ca (44)	2s	Mn*	2s	Fe*	2s	Sc*	2s	Ti*	2s	V	2s	Cr*	2s	Co*	2s	Zn*	2s	Rb	2s	Sr	2s	Y	2s	Zr*	2s	Nb	2s	Cs	2s	Ba	2s	La	2s	Ce	2s	Pr	2s	Nd	2s	Sm
232	0.0102896	5.29394e-05	1.63008	0.012207	15.9754	0.0821926	3.64887	0.0187733	3.52819	0.0181524	1.27926	0.00838119	25.1323	0.270954	76.8026	1.14958	1068.45	39.2538	56.9291	0.292898	69.6674	1.15846	134.11	1.72017	81.7361	1.21299	0.0340664	0.00134002	0.100427	0.023149	172.583	0.887933	151.146	7.43046	0.327551	0.0181551	0.000345336	9.27081e-05	0.0128994	0.00172998	0.000447559	0.000118109	0.00230802	0.000499893	0.000533581	0.000116642	0.0126964	0.00138508	0.106681
233	0.00155971	8.02464e-06	1.65129	0.0123659	16.1966	0.0833311	3.39982	0.0174919	3.28943	0.016924	0.842359	0.00551878	26.0685	0.281046	43.5682	0.652126	644.996	37.3247	63.2985	0.325668	57.588	0.897636	132.36	1.69772	74.9341	1.13158	0.0716804	0.005325	0.127025	0.0332686	101.14	0.853127	40.4967	2.51217	0.189245	0.0281731	0.0162002	0.00176209	0.107746	0.0294888	0.000753158	0.00015154	0.00140978	0.000211476	0.000657513	0.000128027	0.0138071	0.00142799	0.111411
234	0.00698432	3.5934e-05	1.51163	0.01132	16.0245	0.0824451	3.84769	0.0197962	3.71705	0.0191241	1.71647	0.0112456	24.793	0.267295	91.9848	1.37682	908.767	27.3941	54.7227	0.281546	68.7617	1.20699	133.35	1.71042	81.0719	1.16554	0.0610266	0.00476253	0.0503442	0.00343987	244.387	1.25736	48.5828	12.2119	0.341336	0.0203127	7.54618e-05	4.3133e-05	0.0180925	0.0020411	0.000288077	9.43783e-05	bdl		0.000132924	5.79481e-05	0.013556	0.00246085	0.102318
235	bdl		1.72287	0.0129019	16.2315	0.0835104	3.61937	0.0186215	3.53203	0.0181721	0.607339	0.00397903	25.5019	0.274938	53.9312	0.813911	390.57	6.65154	71.0395	0.414876	58.4379	1.16469	111.112	1.43361	74.1071	1.23638	0.56248	0.023379	0.124847	0.00488593	74.2261	0.38189	2.41091	0.479105	-0.00143183	0.000275556	0.102161	0.00468314	1.96565	0.0946015	0.000819836	0.000158213	0.00194895	0.000248836	0.000221643	7.43291e-05	0.0234996	0.00260846	0.190684
236	bdl		1.84744	0.0138348	16.2311	0.0835082	3.92525	0.0201953	3.75944	0.0193422	1.34121	0.00878707	24.1555	0.260422	65.811	0.985055	808.294	38.9705	55.0538	0.283249	95.8568	1.52023	96.7028	1.24036	79.1423	1.1419	0.11303	0.00565577	0.0440391	0.00321459	93.1623	0.497298	35.7452	5.80543	0.31309	0.022255	0.0915202	0.00292838	0.0329662	0.00676138	0.0012427	0.000195163	0.00294947	0.00030675	0.000346934	9.31496e-05	0.0162117	0.00234491	0.124829
237	0.0311734	0.000160386	2.51036	0.0187991	16.2901	0.0838121	3.77733	0.0205621	3.65913	0.0188261	1.05764	0.00692924	22.9113	0.247009	135.67	2.04909	562.615	64.4291	37.3278	0.19205	81.2067	1.23836	96.0985	1.23261	109.616	1.43201	0.211639	0.011905	0.0342054	0.0033826	115.553	0.594517	83.647	11.6226	0.301185	0.0502815	0.0406202	0.00232906	0.0545016	0.00664033	-2.21053e-05	2.59528e-05	0.00140768	0.000211279	0.00023447	7.63478e-05	0.0158771	0.00231606	0.154207
238	0.0515713	0.0082189	1.78646	0.0133781	16.2361	0.0835341	4.12332	0.0212143	3.94698	0.020307	1.13741	0.00745181	24.2765	0.261727	86.0833	1.28849	400.609	8.99729	61.4877	0.316351	89.3029	1.37441	94.684	1.21447	78.3155	1.15041	0.0261836	0.00116075	0.0925127	0.00546743	110.311	0.569547	15.5225	3.41886	0.0187254	0.000999502	bdl		0.18198	0.0239321	0.000284562	9.33907e-05	0.000402586	0.000113294	0.000431785	0.000103888	0.0184168	0.00205928	0.168261
239	0.08416	0.00571966	2.97913	0.0223096	16.1106	0.0828884	3.81281	0.0196168	3.66697	0.0188664	0.755823	0.00495184	21.7688	0.234692	121.664	1.82106	145.089	2.43789	36.7887	0.189276	67.2432	1.02255	97.6729	1.26952	130.275	1.86971	0.0156236	0.000887983	0.0717084	0.00365366	95.4824	0.58582	109.907	12.1639	0.00150617	0.000280499	bdl		0.00526829	0.0010874	0.000132504	6.32102e-05	0.000534898	0.000129534	0.000642493	0.000125667	0.0255636	0.00286096	0.204699
240	0.00372381	1.91588e-05	1.99811	0.0149631	16.3071	0.0838995	3.52136	0.0181172	3.46218	0.0178128	0.835208	0.00571806	24.7377	0.266699	60.717	0.908807	291.865	4.90413	55.188	0.28394	91.7594	1.41473	107.136	1.37419	86.7844	1.38166	0.642309	0.0931805	0.0109977	0.000703928	70.7145	0.363823	0.536281	0.01371	0.00204978	0.000328832	0.0388294	0.00639343	1.35108	0.135249	0.000688497	0.000144858	0.000115381	6.04714e-05	0.00068044	0.000129972	0.0160823	0.00153641	0.159624
241	0.0540872	0.00637226	1.76465	0.0132148	15.9632	0.0821297	3.79266	0.0241287	3.6364	0.0197142	0.930761	0.00609795	24.9152	0.268613	67.979	1.06306	509.336	16.1145	64.6267	0.407794	85.7092	1.41408	120.871	1.55036	90.184	1.45663	0.0153187	0.000882578	0.549431	0.119744	130.847	0.673204	138.613	34.9894	0.0357687	0.00137824	0.000480306	0.000107715	0.0586455	0.00879047	0.00307179	0.000305955	0.00888677	0.000531356	0.00239436	0.000243703	0.0244604	0.00428164	0.149408
242	0.0038689	1.99053e-05	1.88371	0.0141064	16.5948	0.0853793	3.70163	0.0190447	3.57812	0.0184093	1.14111	0.00747608	25.0046	0.269577	66.7217	0.998687	636.22	25.4532	52.046	0.267774	47.2508	0.960173	123.425	1.58312	87.5727	1.16721	0.0524443	0.00520616	0.132853	0.0376548	118.699	0.610702	91.1998	9.88546	0.2032	0.020485	0.00832262	0.000449374	0.0269212	0.00629248	0.00343168	0.000323573	0.00424018	0.000366884	0.00169564	0.000205117	0.0174197	0.00249704	0.126601
243	0.0403627	0.0055684	1.64116	0.01229	16.2609	0.0836618	3.78083	0.0194522	3.65257	0.0187923	0.781884	0.00512257	25.5539	0.275498	68.8524	1.03058	847.678	21.621	65.6992	0.33802	69.1773	1.07395	123.856	1.58865	84.4525	1.16526	0.335967	0.0274618	0.162081	0.0069267	121.841	0.626867	8.06557	1.34732	0.293391	0.0136231	0.0149966	0.00189463	41.0308	3.05906	0.000554604	0.000129746	0.00213192	0.00025953	0.000620687	0.00012379	0.0181629	0.00190338	0.16514
244	0.0424087	0.00463541	1.74636	0.0130778	16.3021	0.0838734	3.45202	0.0177605	3.34734	0.0172219	0.624113	0.00408892	25.7342	0.277442	57.6557	0.862987	428.362	7.19764	65.241	0.335662	32.3145	0.565859	118.245	1.51667	85.1226	1.22713	0.530031	0.0302582	0.231902	0.00742347	78.5118	0.40394	41.254	5.56512	0.00634951	0.000575188	0.0193203	0.000682752	4.20698	0.16988	bdl		0.00186971	0.000242255	0.000587113	0.000119978	0.0198631	0.00228985	0.186065
245	0.0064319	3.30919e-05	1.6979	0.0127149	16.2392	0.08355	3.74265	0.0192558	3.59268	0.0184842	1.44221	0.00944877	24.6971	0.266261	66.9071	1.00146	416.226	6.99531	49.7165	0.255789	55.6578	0.846204	133.195	1.70843	80.6508	1.06914	0.0283026	0.00466325	0.0145514	0.00081205	176.163	0.906351	19.6207	4.32987	0.00121166	0.000253301	0.000511272	0.000111457	0.00233019	0.000729701	bdl		0.000899173	0.000169482	0.000619857	0.000124356	0.0162207	0.00154563	0.103617
246	0.000189329	1.62497e-06	2.05135	0.0153617	16.516	0.0849739	3.71414	0.0191091	3.6138	0.0185929	0.982035	0.00661524	24.3737	0.262774	48.3692	0.723987	286.192	4.80881	52.4297	0.269748	58.0464	0.929511	111.162	1.42886	94.5964	1.36614	0.011146	0.000752007	0.00454402	0.000451878	62.2156	0.320097	30.6116	7.436	0.000449811	0.000153887	0.000260369	7.93104e-05	0.00678418	0.00124222	0.000343464	0.000102443	bdl		0.00099873	0.000157442	0.0139534	0.00142933	0.154211
247	0.00297873	1.53254e-05	2.15455	0.0161346	16.6461	0.0856437	3.86918	0.0199068	3.74356	0.0192604	1.09639	0.00718308	23.8772	0.257422	54.6034	0.817301	289.438	4.86335	52.1885	0.268507	43.5191	0.729102	103.618	1.32906	102.403	1.39437	0.00232644	0.000340222	0.0107054	0.000688409	64.2503	0.330565	20.7165	2.73082	0.000571331	0.000171978	bdl		0.016019	0.00189407	0.000429536	0.000113649	0.000478939	0.000122397	0.000502744	0.000110772	0.0196315	0.00270554	0.197008
248	0.0375775	0.00305242	1.84667	0.013829	16.4331	0.0845478	3.56446	0.018339	3.46884	0.017847	0.785464	0.00612029	25.13	0.270928	56.497	0.845644	347.052	5.9604	58.7553	0.302294	30.085	0.473958	110.79	1.42105	92.2648	1.32438	0.0689183	0.0050666	0.141287	0.0135797	67.3019	0.346266	20.685	4.12353	0.00116328	0.000245576	0.0121236	0.000538762	0.144868	0.0257783	0.000863749	0.000161332	0.00170347	0.000231116	0.00126672	0.000175987	0.0199772	0.00192511	0.17285
249	0.0486851	0.00736831	2.4526	0.0183665	16.4742	0.0847589	3.83924	0.0197527	3.70304	0.019052	1.05191	0.00689167	22.9665	0.247603	127.851	1.91366	397.633	14.029	40.0758	0.297304	78.7191	1.21843	95.9015	1.23009	106.153	1.62111	0.0192311	0.000992378	0.0600743	0.00817063	103.761	0.771284	26.4276	5.63217	0.173804	0.0110059	bdl		0.00221925	0.000713949	0.000338273	0.000102172	0.000674942	0.000147203	0.000612577	0.000123805	0.017215	0.00265163	0.165989
250	0.102933	0.00753315	2.39789	0.0179569	16.3504	0.0841223	3.89753	0.0200526	3.73696	0.0192265	1.03187	0.00676037	22.8658	0.246518	109.172	1.63407	860.276	73.7812	44.6627	0.229788	95.8774	1.55433	93.994	1.20562	105.492	1.619	0.0127023	0.000800681	0.293395	0.0117086	90.4709	0.465469	58.0181	9.05773	0.546606	0.0521473	0.00183539	0.000210173	0.120359	0.0290607	0.0111308	0.001189	0.041016	0.00285976	0.00425034	0.000605395	0.03844	0.00331055	0.188618
261	0.0748845	0.00505966	2.56869	0.0192359	16.3163	0.0839467	3.75783	0.0193339	3.60319	0.0185383	1.03423	0.00677583	22.5206	0.173133	131.337	1.96585	318.416	12.8936	35.9608	0.185017	61.8194	0.91081	95.2531	1.22177	111.359	1.30885	0.0268564	0.00250575	0.0739544	0.00436676	111.987	0.816293	3.22116	0.445224	0.0962892	0.00580424	0.00216357	0.000228539	0.00710772	0.00127127	0.00146876	0.000211713	0.00209128	0.000258204	0.000717584	0.000133487	0.0188462	0.00210077	0.141238
262	0.0356556	0.00308464	3.1116	0.0233016	16.2896	0.0838095	3.76734	0.0193828	3.60482	0.0185466	0.685003	0.00448785	21.4997	0.165284	118.263	1.77015	508.75	45.262	34.119	0.193981	65.6398	0.981289	100.337	1.28698	141.98	1.60562	0.0220608	0.00107263	0.0432887	0.00405063	89.3198	0.459547	52.0402	2.3979	0.301945	0.035648	0.00197045	0.000220987	0.00788883	0.00135699	0.00047707	0.000122215	0.000577307	0.000137424	0.0007922	0.000142133	0.0239374	0.00278467	0.213163
263	0.0532152	0.00292434	2.34919	0.0175922	16.0479	0.082566	3.88606	0.0199936	3.73452	0.019214	0.982517	0.00643704	22.5654	0.173477	94.8794	1.42015	748.114	28.2566	43.9857	0.250839	75.7254	1.16437	95.1233	1.2201	106.325	1.24079	0.478584	0.0184222	0.117841	0.00489051	76.4574	0.39337	49.7	3.71401	0.359971	0.0176861	0.063666	0.00398816	0.143795	0.0107232	0.00180846	0.000238614	0.00180158	0.000243481	0.000878785	0.000150118	0.0185776	0.00317133	0.215643
264	0.554646	0.0216959	2.1122	0.0158174	14.7151	0.0757084	3.91909	0.0201635	3.78019	0.0194489	1.28946	0.00844802	21.2966	0.163723	70.5546	1.05606	373.832	24.6093	61.3649	0.402456	94.8286	1.40253	89.4834	1.14776	90.5104	0.957819	0.0174044	0.000920537	0.435818	0.0170442	59.0838	0.303983	19.8658	4.35438	0.112184	0.016393	0.00337337	0.000279666	0.0534662	0.00563609	0.00151893	0.000210833	0.00133576	0.000202171	0.00106965	0.000159748	0.0207853	0.00264021	0.169465
265	0.0779092	0.0048975	2.23878	0.0167654	15.9157	0.0818855	3.87527	0.0199381	3.71642	0.0191208	1.15962	0.00759735	22.5982	0.173729	74.3385	1.11269	941.739	26.8593	48.8613	0.251389	77.2597	1.17787	97.7935	1.25435	96.5718	1.09785	0.006282	0.000574822	0.0981597	0.00530775	59.0012	0.303559	213.199	28.8857	0.51455	0.0233506	bdl		0.0200756	0.00321308	0.00019366	7.82928e-05	0.00195827	0.000254715	0.000547663	0.000118911	0.0270241	0.0034526	0.20332
266	0.0355997	0.00382321	1.49685	0.0112093	15.8213	0.0814002	3.94297	0.0202864	3.75058	0.0192966	1.80944	0.0118547	24.3096	0.186886	88.8317	1.32963	488.65	7.66096	49.9881	0.257187	74.9075	1.14289	152.531	1.95645	86.6213	1.07253	0.618066	0.0152156	0.107563	0.00553966	277.121	1.42578	10.0579	0.564566	0.00223694	0.000353096	0.0316205	0.00227731	11.0667	0.32999	0.0016103	0.000227917	0.000432434	0.000120787	0.000135846	5.97769e-05	0.0177227	0.00165519	0.0999341
267	bdl		1.7125	0.0128243	16.1466	0.0830734	3.88736	0.0200003	3.68832	0.0189763	1.3213	0.00865659	24.6238	0.189301	71.5085	1.07968	450.096	7.05653	53.2131	0.273779	79.3707	1.3574	150.693	1.93287	87.0397	1.20702	0.230187	0.0140962	0.0746973	0.00807393	176.2	0.906542	44.4768	6.06642	0.0025232	0.000372082	0.0370528	0.00183455	0.765473	0.10512	0.0013425	0.000206432	0.0018655	0.000248997	0.00101559	0.000162221	0.0169647	0.00160684	0.138978
268	0.00206164	1.0607e-05	2.05477	0.0153874	16.0284	0.0824654	3.81208	0.019613	3.66568	0.0188598	1.4244	0.00933205	23.3344	0.179389	54.888	0.821561	478.179	51.299	54.8907	0.282411	81.9015	1.3265	98.0083	1.25711	91.2101	1.07657	0.0249274	0.00115474	0.0133264	0.000793586	61.4179	0.315993	24.5227	4.56071	0.116375	0.0325247	0.00369675	0.000306439	0.0108838	0.0016121	bdl		0.0018165	0.000246757	0.000552554	0.000120156	0.0150178	0.00151808	0.174374
269	0.00826586	4.25275e-05	3.2546	0.0243724	16.1398	0.0830385	3.69758	0.0190239	3.52796	0.0181512	0.665078	0.00435731	21.5151	0.165403	132.895	1.98917	437.425	24.7588	32.5564	0.167501	73.5898	1.20788	103.679	1.32985	148.122	1.3809	0.091485	0.00820444	0.050284	0.0030479	102.261	0.702188	110.9	7.80935	0.253406	0.0182991	0.00953207	0.000494832	0.993878	0.386578	0.00100666	0.000180204	0.00204626	0.000263023	0.000510884	0.000116034	0.0190409	0.00247838	0.165472
270	0.281937	0.00491345	2.81533	0.0210829	15.1045	0.0777119	3.74589	0.0192725	3.58716	0.0184558	0.812421	0.00532264	21.0318	0.161687	119.574	1.78977	138.527	2.25272	41.0957	0.211436	67.271	1.04385	92.8956	1.19153	120.09	1.43121	0.0613385	0.00572779	0.338198	0.00808353	81.9526	0.421643	2.85023	0.876431	0.00100384	0.000231023	0.0154185	0.00215026	0.145249	0.0201837	0.000723267	0.000149054	0.00151785	0.000221083	0.000203406	7.14557e-05	0.0204016	0.00247824	0.135265
271	0.0837524	0.00485559	2.94444	0.0220498	15.7352	0.0809569	3.72209	0.01915	3.54576	0.0182428	0.771255	0.00505294	21.4597	0.164977	117.386	1.75703	373.276	18.9252	35.7137	0.269247	83.9336	1.22463	97.6472	1.25248	129.695	1.42024	0.0283893	0.00401087	0.131721	0.00961202	84.5358	0.434933	61.6774	14.8656	0.118582	0.00472276	0.00317734	0.000282818	0.0244331	0.00368134	0.00119909	0.000194954	0.0033648	0.000334526	0.00114931	0.000172599	0.0273805	0.0029348	0.202206
272	0.00510907	2.62859e-05	1.79302	0.0134272	15.9193	0.081904	3.43799	0.0176883	3.32374	0.0171005	0.842915	0.00552242	25.0716	0.192744	50.2215	0.751712	326.998	5.16532	58.2182	0.305382	28.1337	0.747606	128.649	1.65013	82.9528	0.974001	0.0123777	0.000811348	0.434255	0.129046	76.3614	0.392876	0.68135	0.0393797	0.00102305	0.000237586	bdl		0.0112099	0.00163279	0.000518354	0.000128482	0.002013	0.000259368	0.000643253	0.000129453	0.0156384	0.00154671	0.139224
273	0.060271	0.00844398	1.84445	0.0138123	15.7703	0.0811375	3.97808	0.0213701	3.78296	0.0194632	0.96084	0.00629502	24.1649	0.185773	68.2464	1.03746	388.75	13.5021	57.787	0.360071	45.7218	0.749701	124.628	1.59855	83.2058	0.928489	0.800519	0.0781562	8.31071	0.538842	100.252	0.602009	5.9823	1.2052	0.0284801	0.00124763	0.770243	0.112806	13.3933	4.1368	0.0461439	0.00324936	0.0958503	0.00856126	0.0129016	0.00152578	0.0855619	0.00744271	0.176904
274	0.0112227	5.77402e-05	1.89127	0.014163	15.9357	0.0819885	3.73881	0.019236	3.60365	0.0185406	1.01056	0.00685923	24.3825	0.187446	51.2552	0.767185	313.892	4.96582	57.3694	0.295163	42.0841	0.68293	115.513	1.48164	81.9707	1.07885	0.0891272	0.00918473	0.032457	0.00314832	65.7042	0.35605	0.524777	0.015544	0.00136131	0.000274133	0.0355903	0.00472365	0.0272012	0.0035061	bdl		0.000323217	0.0001039	0.000430497	0.000105898	0.0185479	0.00273015	0.164631
275	0.0432956	0.00465648	1.64746	0.0123372	15.6666	0.080604	3.70714	0.0201226	3.53972	0.0182117	0.991108	0.00649332	25.0648	0.192692	68.1347	1.03894	683.891	61.1546	54.8371	0.288952	57.3187	0.913028	142.642	1.8296	78.4988	0.822777	0.0291028	0.0012442	3.00694	0.488454	131.225	1.11375	29.4038	5.83624	0.214737	0.00352218	0.000893257	0.000149916	0.214364	0.0357025	0.013083	0.00224251	0.0244506	0.00221854	0.00496417	0.000359233	0.040906	0.00618281	0.128331
276	0.0602213	0.00748544	2.05317	0.0153754	15.8601	0.0815998	3.85716	0.0198449	3.6794	0.0189304	0.975401	0.00639042	23.869	0.183498	62.6012	0.93701	355.951	5.76181	53.5734	0.275842	53.9437	0.950204	118.902	1.5251	97.0501	0.90477	0.0400971	0.00450563	0.200755	0.0188039	90.68	0.466545	31.0489	3.05813	0.00662066	0.000600393	0.00760883	0.000436021	0.432059	0.0485177	0.000725467	0.000150787	0.00112937	0.000192838	0.000207267	7.29443e-05	0.0155055	0.00221317	0.191259
277	0.112573	0.00400631	2.34635	0.0175709	15.6621	0.0805809	3.86744	0.0198978	3.69948	0.0190337	0.987456	0.00678314	22.279	0.171275	93.0313	1.39249	555.617	36.8461	44.3914	0.228392	84.805	1.29759	93.8691	1.20402	106.045	1.44418	0.324927	0.0281472	0.506222	0.0192137	74.2577	0.382053	170.034	19.3054	0.267026	0.0269452	0.132622	0.0181438	1.71743	0.125278	0.00142911	0.000212312	0.00555593	0.000870042	0.00118907	0.000175293	0.019908	0.0035702	0.20972
278	0.0300227	0.000154466	2.50944	0.0187923	15.9301	0.0819595	3.77243	0.019409	3.59363	0.0184891	1.02134	0.00669142	22.6267	0.173948	115.625	1.73067	340.459	25.1511	36.2147	0.214838	78.4098	1.18865	95.8221	1.22907	109.932	1.34961	0.809375	0.0292255	0.128899	0.00567794	97.5127	0.501699	47.1373	3.1689	0.142987	0.0174069	0.0938441	0.00401557	20.7001	1.30582	0.000805378	0.000159837	0.00473282	0.000397557	0.000654834	0.000130478	0.0168046	0.00160187	0.156822
279	0.461021	0.0076405	2.30483	0.0172599	14.3925	0.0740487	4.07246	0.0209526	3.92217	0.0201794	0.897956	0.00588303	21.1857	0.16287	73.9943	1.10754	1038.09	30.4458	59.6032	0.311997	81.5697	1.24399	88.1921	1.1312	99.0878	1.09562	0.0183079	0.000948857	0.408316	0.0107414	52.6214	0.281485	0.736001	0.0961844	0.637054	0.0222568	bdl		0.0679745	0.00956958	0.00131582	0.000196411	0.00195857	0.000245767	0.00083081	0.000141317	0.0160014	0.00150311	0.19537
280	0.0170148	8.75405e-05	1.97272	0.0147729	15.8428	0.0815105	4.01966	0.020681	3.83838	0.0197483	1.54871	0.0101465	23.384	0.17977	57.7901	0.864999	349.344	5.47695	57.5685	0.296187	86.1697	1.46289	95.6068	1.22631	84.3189	1.00206	0.0116982	0.000783301	0.25869	0.00358284	69.439	0.357261	28.4651	3.69067	0.00053656	0.000170811	bdl		0.0364439	0.00292184	0.00674504	0.000459977	0.0129246	0.000653821	0.0025028	0.00025354	0.0285042	0.00207397	0.158706
281	0.00968682	4.98383e-05	2.03627	0.0152488	16.0109	0.0823756	3.62822	0.0238843	3.50828	0.0180499	0.907014	0.00594237	24.3589	0.187264	60.7326	0.933311	621.127	24.7479	54.4855	0.286179	25.0507	0.50446	114.029	1.46259	89.7901	0.988078	0.0118845	0.000789129	0.0210664	0.000988947	65.8529	0.407551	10.3611	1.77463	0.267291	0.0180698	bdl		0.0198757	0.002156	bdl		0.000234702	8.7871e-05	0.000457169	0.000108288	0.0188829	0.00168729	0.170376
282	0.0416965	0.00345246	2.90127	0.0217265	15.8535	0.0815657	3.68804	0.0189748	3.51648	0.0180922	0.848222	0.00555719	22.0491	0.169508	128.072	1.91697	204.762	4.6849	31.8384	0.163807	65.6724	1.0336	99.0012	1.26984	125.248	1.34353	0.0148982	0.000886787	0.0572422	0.00620574	88.9973	0.457887	18.2597	4.10433	0.0539671	0.00264419	bdl		0.0036148	0.000921667	0.000277774	9.34388e-05	0.000742981	0.000156811	0.000527783	0.000116677	0.0161432	0.00236169	0.167727
283	0.00717276	3.69036e-05	2.73485	0.0204802	15.9046	0.0818287	3.73252	0.0192036	3.55375	0.0182839	0.947681	0.0062088	22.3975	0.172186	130.735	1.95684	254.881	13.9207	33.2014	0.17082	77.7583	1.13715	97.9264	1.25606	118.309	1.21463	0.0288984	0.00123741	0.0239708	0.00105871	99.0851	0.727801	10.8473	2.52857	0.0616986	0.00846678	0.00218054	0.000233596	0.0133383	0.00177084	0.000704565	0.000148807	0.000659939	0.000147794	0.000835322	0.000146792	0.0166286	0.00158774	0.151876
284	0.053738	0.00513426	2.79361	0.0209203	15.9616	0.0821215	3.80304	0.0195665	3.61851	0.0186171	0.910213	0.00596333	22.2457	0.171019	136.778	2.04728	177.281	5.24696	34.8022	0.28031	77.1598	1.15637	98.1107	1.25842	119.463	1.31399	0.0614369	0.00631552	0.161647	0.00597767	99.0848	0.548186	20.3265	5.02046	0.0200506	0.00298034	0.0147221	0.00182916	0.0657129	0.00388953	0.00285859	0.000296286	0.0190166	0.00187149	0.00244329	0.000248195	0.0257587	0.00303097	0.156778
285	0.301516	0.00489683	2.92059	0.0218711	15.1153	0.0777677	3.79956	0.0195486	3.6351	0.0187024	0.766379	0.00502099	21.1696	0.162746	129.703	1.94139	2220.86	86.4867	44.1308	0.251858	70.0927	1.02671	93.2311	1.19583	122.092	1.45656	0.111959	0.0146897	0.284639	0.004973	87.0383	0.447808	59.1989	4.89821	1.64297	0.0358112	0.0414783	0.00662322	0.0260887	0.00240786	0.000837146	0.000157625	0.00314401	0.000453905	0.000877514	0.000146236	0.0171397	0.00257237	0.138925
286	0.0101517	5.22303e-05	2.37131	0.0177578	15.8452	0.0815231	3.95818	0.0203647	3.74342	0.0192597	1.03172	0.0067594	22.9307	0.176285	100.775	1.5084	250.207	14.1173	43.0521	0.221501	85.4999	1.29781	96.3049	1.23526	106.747	1.18492	0.25209	0.0125139	0.0493934	0.00390415	79.5651	0.420057	97.8393	9.28232	0.048362	0.00969726	0.0154311	0.00132965	0.325535	0.0295572	bdl		0.00141023	0.000216051	0.00132854	0.000185063	0.0228702	0.00285022	0.230743
287	0.00828771	4.26399e-05	2.08422	0.0156079	15.7858	0.0812171	3.83297	0.0197205	3.70909	0.0190831	1.53536	0.010059	23.3117	0.179214	53.9416	0.807394	437.686	9.55576	55.0068	0.283007	42.1742	0.641607	97.4895	1.25045	89.5197	0.929636	0.0150941	0.000887373	0.0247168	0.00337596	60.9738	0.313708	35.0216	6.71522	0.0682737	0.0039737	0.00269536	0.000258003	0.0215734	0.00223749	0.000637481	0.00014055	0.0014841	0.000220283	0.000256648	8.08108e-05	0.015145	0.0015057	0.162307
288	bdl		2.11291	0.0158228	15.7966	0.0812729	3.90176	0.0200744	3.75412	0.0193148	1.52497	0.00999094	23.2856	0.179014	54.3965	0.814204	1698.89	114.44	59.2371	0.304772	31.0912	0.545768	98.8766	1.27332	91.0144	1.09098	0.0171984	0.000939697	0.0157319	0.000844127	61.692	0.317403	73.1935	13.4632	1.01092	0.0729243	bdl		0.0065746	0.00122442	0.000586882	0.000133728	0.000836333	0.000163993	0.000565905	0.000119015	0.0177231	0.00205545	0.174706
289	0.0129685	6.67223e-05	2.40915	0.0180412	15.7215	0.0808865	4.01209	0.020642	3.80827	0.0195934	1.04978	0.00687773	22.8321	0.175527	105.284	1.57588	289.173	4.53361	50.2226	0.312046	61.7825	0.971678	94.1423	1.20752	109.919	1.437	0.0349514	0.0013603	0.0534629	0.00619281	93.2617	0.488304	0.657235	0.0167709	0.00036659	0.000141341	0.0007046	0.000132423	0.0568062	0.012391	0.00010483	5.72307e-05	0.000601228	0.000140826	0.000749129	0.000138675	0.0184019	0.00166752	0.162257
290	0.00207644	1.06832e-05	2.23196	0.0167143	16.005	0.0823452	4.19749	0.0215959	4.05636	0.0208698	1.18687	0.00777586	23.0918	0.177523	62.0112	0.92818	456.284	18.81	55.8637	0.287416	57.6395	0.875043	97.7342	1.25359	98.6003	1.1626	0.635813	0.0528144	0.0380542	0.00622875	61.8951	0.318447	15.446	2.1486	0.0852072	0.0116132	0.0181721	0.00192097	2.41774	0.233118	0.000151183	6.7754e-05	0.00067367	0.00014699	0.000506329	0.000112398	0.0184647	0.00164723	0.205667
291	0.0540499	0.0045985	3.06417	0.0229464	15.731	0.0809352	3.78964	0.0194975	3.59171	0.0184792	0.737838	0.00589266	21.7302	0.167056	119.909	1.79478	261.065	6.98631	33.3934	0.171808	81.201	1.29267	100.517	1.28928	136.024	1.72189	0.0134157	0.000839735	0.055939	0.0049531	91.5289	0.470912	31.1104	2.86677	0.0915514	0.00445336	0.000110226	5.23032e-05	0.00809306	0.00137434	0.000111015	5.88181e-05	0.000511931	0.000129827	0.000319018	9.03771e-05	0.0176939	0.00219076	0.20553
292	0.0478211	0.00269929	2.20295	0.016497	15.5437	0.0799719	4.03377	0.0207536	3.87756	0.0199499	1.34529	0.00881375	22.8545	0.175699	63.3375	0.948031	794.034	112.197	59.4883	0.306065	59.0558	0.883643	98.6448	1.26527	98.1212	1.13944	0.00613422	0.000560021	0.119982	0.00476929	59.2834	0.305011	40.6349	5.93048	0.359838	0.0045582	bdl		0.00645482	0.00121132	0.000407813	0.000111261	0.000732175	0.000153261	0.000849298	0.000145551	0.0214786	0.00464889	0.165037
293	0.0832121	0.0022691	2.68877	0.0201352	15.7201	0.0808791	3.75733	0.0235286	3.59063	0.0184737	0.983328	0.00644235	22.3063	0.171485	131.749	1.9762	1072.66	94.5134	38.3219	0.259612	88.5281	1.43137	96.0886	1.30119	114.311	1.32912	0.0174295	0.00094431	0.125016	0.00527297	104.638	0.779912	171.276	38.134	0.739464	0.0672528	bdl		0.0224735	0.00225861	0.000664083	0.000141811	0.00175733	0.000237245	0.000166616	6.43799e-05	0.0116248	0.00130544	0.135807
294	0.0600882	0.0047459	2.26771	0.016982	15.6141	0.0803339	3.91078	0.0201208	3.75287	0.0193083	1.17771	0.00771585	22.9342	0.176312	64.4972	0.96539	338.195	13.6178	47.8222	0.336717	100.594	1.46605	99.9486	1.282	100.066	1.30084	0.0195714	0.00100954	0.79595	0.087278	55.4062	0.285062	33.1787	6.31962	0.0885313	0.0060201	0.00586	0.000379626	0.496918	0.0896572	0.0012719	0.000197906	0.002751	0.0002994	0.00170653	0.00020782	0.0233077	0.00387708	0.207004
295	0.0830298	0.00634718	2.34146	0.0175343	15.4455	0.0794667	4.004	0.0206004	3.82396	0.0196741	0.961553	0.00629969	22.6027	0.173764	81.7383	1.22345	567.43	13.083	46.4433	0.238949	88.8158	1.36354	95.125	1.22013	103.353	1.09438	0.0153772	0.000892212	0.0937871	0.00511015	68.2921	0.520968	24.6213	6.37583	0.246324	0.0126832	0.000608682	0.000121861	0.0217261	0.00223361	0.000341841	0.000102315	0.00250483	0.000285	0.000710764	0.000133743	0.0161415	0.00176529	0.196277
296	0.0329951	0.0037623	2.26881	0.0169903	15.5948	0.0802348	3.93006	0.02022	3.77354	0.0194147	1.12711	0.00775379	22.9363	0.176328	77.9273	1.16641	681.388	61.9064	47.345	0.243588	87.562	1.29155	98.7083	1.26609	100.317	1.22395	0.0518603	0.00446215	0.0510654	0.00324104	59.4514	0.305875	18.7976	0.728462	0.389301	0.0517289	0.00359682	0.000297139	0.0273126	0.0025105	0.000635224	0.000139787	0.00185169	0.000245587	0.00131432	0.000182287	0.0240202	0.00189333	0.226609
297	0.0712212	0.00385417	1.83468	0.0137392	15.5136	0.079817	3.7686	0.0193893	3.62846	0.0186683	0.80731	0.00528915	24.4592	0.188036	76.1464	1.13975	432.259	13.7492	64.4081	0.331377	69.8308	1.10458	102.881	1.31961	80.4866	0.9392	0.693396	0.0254619	0.195423	0.00925302	68.3103	0.351454	15.9822	1.59492	0.0631655	0.0115527	0.0987098	0.00851877	5.03288	0.161742	0.00332226	0.000315961	0.0287832	0.00313246	0.00239322	0.000243042	0.0297516	0.00322461	0.208572
298	0.0206532	0.00286685	3.14902	0.0235818	15.6409	0.0804715	3.71988	0.0191386	3.53577	0.0181914	0.676187	0.00443009	21.5767	0.165876	127.949	1.91513	196.591	7.78833	32.143	0.165375	63.5242	1.01261	100.746	1.29222	142.993	1.67797	0.181255	0.0117256	0.0816615	0.00419981	93.5134	0.603282	87.6146	17.8123	0.0572006	0.00541131	0.028413	0.00207369	0.0390368	0.00590578	0.000759038	0.000152441	0.0030694	0.000431527	0.00116624	0.000171284	0.0206465	0.00245884	0.187409
299	0.0531521	0.00277183	3.01885	0.022607	15.6021	0.0802719	3.72468	0.0211959	3.56552	0.0183444	0.775902	0.00508338	21.7001	0.166824	121.046	1.84263	137.911	2.35619	32.9582	0.192515	70.489	1.14995	99.4466	1.30382	133.489	1.49337	0.298182	0.00873121	0.0833384	0.00376345	83.1099	0.427597	24.9006	2.68129	0.00218043	0.000340721	0.00740631	0.000424565	27.4467	0.330223	0.00138636	0.000205447	0.00244753	0.000281047	0.000790005	0.000140546	0.0197878	0.00322728	0.203146
300	0.0394917	0.00376115	2.68598	0.0201143	15.5443	0.0799747	3.76174	0.019354	3.57463	0.0183913	0.995156	0.00651984	22.415	0.17232	135.57	2.0292	348.042	10.9904	34.0508	0.176535	80.1951	1.17089	97.6807	1.25291	117.362	1.33543	0.185059	0.0074179	0.0751356	0.00818294	102.148	0.928582	75.9833	13.9777	0.110138	0.00864792	0.124103	0.00826056	0.0348432	0.0028413	0.00199889	0.000248419	0.00778253	0.00203798	0.00162201	0.0002028	0.0141271	0.00145476	0.125361
311	0.0274612	0.000141287	2.52131	0.0188811	15.885	0.0817278	3.79663	0.0195335	3.63241	0.0186886	1.07965	0.00707339	22.7642	0.173356	139.746	2.0917	210.09	2.98233	35.7773	0.184073	74.0641	1.15529	95.4885	1.22479	109.846	1.37467	0.0181266	0.000970597	0.0306453	0.00360134	120.225	0.863532	66.2446	4.49131	0.0310268	0.00203236	bdl		0.00470427	0.00103783	0.000799801	0.000156307	0.00180202	0.00024147	0.000476794	0.00010932	0.0136048	0.0021362	0.130048
312	0.0913102	0.00750475	2.97292	0.022263	15.6108	0.0803171	3.73039	0.0191927	3.56424	0.0183379	0.833623	0.00546155	21.441	0.163279	132.298	1.98023	275.189	12.9251	36.8603	0.323532	69.6413	1.03316	98.4849	1.26322	127.806	1.39973	0.0195628	0.00101055	0.167066	0.00710248	86.3715	0.628238	26.918	2.52302	0.100679	0.0106228	bdl		0.0100908	0.00152342	0.000351392	0.000103817	0.00139318	0.000212737	0.000860292	0.000147172	0.0190981	0.00208227	0.157176
313	0.0505935	0.00384435	2.7217	0.0203818	15.6598	0.080569	3.69448	0.0264797	3.56013	0.0183167	0.937237	0.00614038	21.9965	0.16751	136.052	2.10193	2728.18	62.2794	37.9124	0.377805	63.1072	1.0248	95.4176	1.25727	116.201	1.39471	0.033701	0.00134026	0.079827	0.00570387	100.388	0.884674	40.9915	4.43338	1.91814	0.0532208	0.00460825	0.00033894	0.0343589	0.00526186	0.00129869	0.000201301	0.00174537	0.000240097	0.000361586	9.61899e-05	0.0117517	0.00133865	0.144555
314	0.00925123	4.75972e-05	1.88701	0.0141311	15.6275	0.0804027	3.55248	0.0182774	3.43558	0.0176759	0.979102	0.00641466	24.2937	0.185004	54.8872	0.821548	287.493	3.22177	58.5087	0.301025	29.1126	0.535784	110.664	1.41944	82.4266	0.788286	2.03446	0.377915	0.876766	0.221385	58.1533	0.363495	25.4122	3.48509	0.00674256	0.000611398	0.163544	0.0110137	12.7821	3.15513	0.00477569	0.000816649	0.0156254	0.00212419	0.00171189	0.000210486	0.0256732	0.00280359	0.172155
315	0.193429	0.00592016	2.89288	0.0216637	14.9279	0.0768035	3.79571	0.0195288	3.63814	0.0187181	0.787507	0.00547762	20.8311	0.158635	117.511	1.7589	1972.63	53.5937	44.5154	0.22903	69.466	1.0944	92.5584	1.18721	124.098	1.31918	0.335968	0.0159576	0.437952	0.0101745	86.9493	0.447351	3.01452	0.786854	1.24352	0.0320531	0.0760963	0.00362328	0.190503	0.012417	0.00248697	0.000516259	0.00387112	0.000495519	0.00150901	0.000194983	0.0211504	0.00178348	0.167093
316	0.075609	0.00353498	2.54421	0.0190526	15.4967	0.0797299	3.7661	0.0193764	3.56663	0.0183502	1.02041	0.00668529	22.2959	0.16979	131.308	1.9654	808.64	56.7035	38.2693	0.196894	78.5171	1.19382	94.5767	1.21309	109.213	1.10085	0.232251	0.0344221	0.0845441	0.0039654	106.887	0.672576	27.6462	3.60556	0.483209	0.0350939	0.00771263	0.000442192	0.458366	0.0968871	5.38066e-05	4.1271e-05	0.00206685	0.00026316	0.000804731	0.000144549	0.0105555	0.00127915	0.131718
317	0.00932995	4.80022e-05	1.85411	0.0138847	15.6695	0.0806192	3.54346	0.0183787	3.43378	0.0176666	1.00534	0.00930546	24.4283	0.186029	45.9741	0.706323	585.531	33.2737	58.3563	0.300241	20.2718	0.383245	110.087	1.41346	77.1675	0.934519	0.246514	0.0144108	0.196923	0.00982777	58.2069	0.300597	0.582256	0.0181981	0.329914	0.0343997	0.0246969	0.00181633	0.634628	0.0200523	0.000623952	0.000140348	0.00312346	0.000323059	0.00131485	0.000184502	0.0222858	0.00185736	0.163974
318	0.866672	0.006668	2.25925	0.0169187	13.1388	0.0675988	4.05868	0.0208818	3.89174	0.0200229	1.0002	0.00655289	19.7728	0.150576	72.4793	1.08487	765.067	18.3338	70.9966	0.365274	78.4401	1.22003	81.6913	1.04782	95.0455	1.08792	0.143076	0.0127205	0.800119	0.00956278	47.0044	0.241836	152.232	5.01793	0.413064	0.0197928	0.0193861	0.00168824	0.15507	0.0116636	0.00367245	0.000538486	0.0164064	0.00163858	0.00165341	0.000195019	0.0265525	0.00385114	0.143024
319	0.170255	0.00515884	0.284221	0.00758165	16.5454	0.0851252	15.8691	0.081646	14.3212	0.0736819	0.329044	0.00215576	10.5147	0.0800728	106.533	1.62546	306.106	2.64089	182.403	1.04325	58.6542	0.902832	6.76256	0.214341	12.4734	0.504826	2.32558	0.316109	809.133	4.16295	85.862	0.722527	7.10235	1.95803	0.00483797	0.000514583	0.383367	0.012868	51.559	6.68389	0.143013	0.00457823	0.183745	0.00537364	0.0526185	0.00163362	0.230533	0.00886887	0.22805
320	0.122907	0.00919375	0.16514	0.0113298	17.0628	0.0877873	16.6971	0.085906	14.9106	0.0767142	0.381918	0.00254844	9.91027	0.0754696	124.503	1.86355	519.335	4.31532	261.049	1.34309	66.8427	1.08457	2.76708	0.191163	7.90307	0.357237	1.38981	0.163315	1046.69	5.3852	122.075	0.638116	31.8831	4.38481	0.00329247	0.000422581	0.133877	0.00645133	83.8599	4.82222	0.127943	0.00358637	0.231354	0.00524631	0.0438691	0.00227641	0.20017	0.00846575	0.256547
321	0.0331377	0.0061328	0.0335076	0.00130517	17.807	0.0916162	17.2212	0.0886021	15.4313	0.0793936	0.332134	0.002176	9.19188	0.0699988	171.563	2.95118	2167.26	237.459	363.887	1.87218	70.8169	1.09141	0.711304	0.0358832	3.32966	0.0874464	0.769794	0.0265836	1058.91	5.44806	163.909	2.25768	23.084	4.21605	1.3704	0.191597	0.178537	0.00530786	65.9963	0.961291	2.07277	0.0139352	4.96217	0.0255301	0.650222	0.00518302	3.25515	0.0451487	1.31405
322	0.0565232	0.00304619	0.295814	0.00556816	17.5896	0.0904976	16.2958	0.0838414	14.6625	0.0754377	0.348469	0.00228302	9.30765	0.0708804	121.339	1.9458	3279.53	115.417	299.717	1.54203	79.5483	1.33115	7.84931	0.109961	16.1582	0.357732	0.677891	0.0164373	1068.02	6.58767	117.427	1.33632	86.3201	10.8687	1.3518	0.0714333	0.0623944	0.00624464	75.1005	0.674873	0.299887	0.00580398	0.614338	0.00892197	0.08873	0.00315434	0.43839	0.0121919	0.319514
323	0.0695516	0.00683345	0.0957136	0.00462968	17.1233	0.0880989	16.9909	0.0874176	15.2098	0.0782536	0.269272	0.00176416	10.0634	0.0766361	127.246	1.99339	607.559	19.6011	264.239	1.60512	78.3844	1.17019	2.10577	0.0985308	5.40237	0.294971	0.36467	0.0178835	903.819	4.65011	96.0865	0.785019	16.6964	1.77201	0.188408	0.0222725	0.118912	0.00693865	29.7689	0.495984	1.36399	0.013337	3.09547	0.0218174	0.434305	0.00518016	2.18045	0.0312432	0.980381
324	0.1462	0.00837406	2.66221	0.0199363	15.4381	0.0794284	3.50809	0.018049	3.38206	0.0174006	0.954513	0.00625356	21.4632	0.163448	120.548	1.80436	1836.53	71.9605	34.7886	0.336907	67.2985	1.05896	95.4647	1.22448	118.324	1.3474	0.271827	0.0605663	0.835247	0.0407296	91.6716	0.471647	194.575	39.0228	1.30078	0.0526139	0.0143118	0.000611646	1.81408	0.112649	0.0012007	0.000197632	0.0033971	0.000341719	0.00127116	0.000183998	0.0145563	0.00152618	0.118063
325	0.023905	0.00012299	2.43155	0.0182089	15.6163	0.0803453	3.81413	0.0196236	3.65144	0.0187865	1.12614	0.00737801	22.3704	0.170357	89.0542	1.35172	1155.33	92.5868	42.5072	0.218698	81.9542	1.282	98.9244	1.26886	105.743	1.27162	0.0394712	0.00314794	0.0471066	0.00322428	78.3136	0.484855	99.4384	6.02355	0.78933	0.0621795	0.00309569	0.00028263	0.0189016	0.00213955	0.000566773	0.00013527	0.000719615	0.000156608	0.000673565	0.00013342	0.0160823	0.00159898	0.153918
326	0.161647	0.00342667	3.0258	0.0226591	15.3341	0.0788931	3.87038	0.0199129	3.71832	0.0191306	0.688105	0.00450817	20.9477	0.159523	113.778	1.70302	219.546	9.16521	38.9036	0.200158	65.7883	1.02973	95.3043	1.22243	130.341	1.62893	0.0475187	0.00588263	0.181978	0.00728011	84.0439	0.432402	25.1512	4.02267	0.0654276	0.00869066	0.00691105	0.00041185	0.0117723	0.00164463	0.000672536	0.000143555	0.00203504	0.000256615	0.00108692	0.00016512	0.0194665	0.0031114	0.194527
327	0.0115694	5.9524e-05	2.34103	0.0175311	15.7638	0.0811041	3.83898	0.0197514	3.7036	0.0190549	1.0627	0.00696237	22.7318	0.173109	88.7821	1.32888	2034.44	49.0827	44.4977	0.228939	82.1689	1.28399	98.3252	1.26117	103.84	1.12769	0.00610763	0.000584084	0.0230714	0.00106611	70.4773	0.362602	71.2901	14.1318	1.4325	0.0331754	bdl		0.0150796	0.002602	0.000130193	6.53267e-05	0.0013573	0.00021672	0.000559664	0.000122527	0.0180706	0.00170917	0.18534
328	0.0522714	0.00680235	2.56869	0.0192359	15.792	0.0812492	3.70126	0.0190428	3.56956	0.0183652	0.997172	0.00653305	22.3066	0.169871	127.61	1.91006	1587.08	115.204	37.7986	0.194472	71.3399	1.08931	94.3717	1.21046	107.736	1.06278	0.0102393	0.000742631	0.0952558	0.00717789	100.01	0.66737	100.224	5.63307	1.06883	0.0744769	bdl		0.0187994	0.00303545	0.00119914	0.000194643	0.00253445	0.000290727	0.000503232	0.000114037	0.0148185	0.00151961	0.126003
329	0.0398334	0.00431479	1.79274	0.0134251	15.5324	0.0799133	3.71122	0.0190941	3.59052	0.0184731	0.467442	0.00306248	24.7909	0.18879	71.0772	1.06388	1040.52	82.3364	68.9607	0.3548	86.2164	1.25753	156.821	2.01147	82.6837	0.972203	0.147939	0.00717767	0.108522	0.00654893	65.6426	0.543403	27.1723	4.26448	0.354746	0.0449596	0.0763954	0.00454379	0.0441426	0.00325625	0.000674062	0.000146814	0.00251631	0.000291419	0.000784318	0.000143225	0.022989	0.00319926	0.316608
330	0.0706926	0.00570358	2.6413	0.0197797	15.0707	0.077538	3.55669	0.0223669	3.45815	0.0232604	0.939126	0.00660187	21.6604	0.1691	112.849	1.72666	461.022	38.0075	36.5222	0.187905	66.4878	1.02519	92.2005	1.18479	81.1748	0.961023	0.0157763	0.00114602	0.0714166	0.0050477	90.6318	0.688767	12.2113	1.53816	0.25818	0.0284729	0.00115755	0.000212196	0.0100549	0.00191549	5.71662e-05	5.27377e-05	0.000970184	0.000223093	0.000581278	0.000152038	0.015439	0.00192496	0.148291
331	0.109786	0.0125634	2.46244	0.0184403	15.998	0.0823089	4.07187	0.0209496	3.92273	0.0201823	0.978252	0.00640909	22.4576	0.171021	95.0076	1.42207	339.983	6.25467	49.4266	0.652464	68.148	1.14516	95.3592	1.22313	99.1336	1.44619	0.0456367	0.00556711	0.174035	0.0205438	77.9402	0.400999	0.455484	0.0142707	0.0715014	0.00660236	0.0114036	0.00140146	0.0715497	0.0118222	0.00168206	0.000234482	0.00293122	0.00031791	0.000846582	0.000150407	0.0199348	0.00179458	0.173981
332	bdl		1.71055	0.0128097	15.8642	0.0816205	3.63125	0.0191601	3.55284	0.0182792	0.342388	0.00233768	25.6545	0.195366	51.9176	0.777099	435.795	3.5097	71.9214	0.422004	45.59	0.768089	227.803	3.0843	65.6685	0.917901	0.197174	0.0106781	0.0459569	0.00378148	62.3262	0.320666	4.04775	1.29466	0.00256407	0.000407463	0.00127148	0.000193541	21.7984	1.05454	0.00100684	0.000192646	0.000258172	0.000100139	0.000902241	0.000164885	0.0277169	0.00224825	0.294892
333	0.00489651	2.51923e-05	1.6508	0.013273	15.2323	0.0783693	3.41446	0.0217584	3.34678	0.024605	0.309079	0.00260282	25.3007	0.22665	45.1802	0.706393	432.503	3.75976	66.7924	0.671178	61.5103	1.1373	219.652	3.45794	50.9349	0.656037	0.360286	0.0244495	0.0513917	0.00637323	55.0992	0.477732	2.20267	0.653642	0.00404949	0.000573215	0.0238911	0.00257445	26.2342	1.73613	0.000542913	0.000158309	0.000643319	0.000176892	0.00104483	0.000198538	0.0177896	0.00201502	0.266495
334	0.00434992	2.23801e-05	1.96553	0.0154699	16.2294	0.0834997	3.6481	0.0187693	3.54916	0.0182603	0.978631	0.00641158	24.6027	0.187356	56.1475	0.840411	1110.58	102.906	59.5209	0.306233	36.566	0.716141	153.317	1.96653	73.3909	1.15722	0.0223418	0.00109424	0.0442801	0.00144784	60.5234	0.31139	13.3869	2.26878	0.593502	0.0730223	bdl		0.0228639	0.00231629	bdl		0.00182931	0.000245585	0.00101098	0.000160781	0.019068	0.00257478	0.180871
335	0.0118308	6.08687e-05	2.44099	0.0182796	15.6289	0.08041	3.73213	0.0237409	3.62998	0.0186761	1.01156	0.00662732	22.4815	0.171203	110.896	1.69525	232	29.2239	38.7562	0.248559	70.873	1.11099	93.877	1.35522	90.6243	1.34917	0.000154876	0.000103782	0.0288031	0.00132938	92.4757	0.721672	235.875	41.8796	0.0495325	0.00189013	bdl		0.0103825	0.00177988	0.000347901	0.000118966	0.00153009	0.000256066	0.000563216	0.000136794	0.0179237	0.00189956	0.153689
*BIR-1G is used as the primary reference material
[truncated: 29 more columns]

## Sheet: S3d_OM20-17
Table S3d. LASS-ICP-MS trace element analyses of garnet from sample OM20-17A (Session 1).
	Major elements (wt %)														Trace elements (μg/g)
Analyses	Na	2s	Mg*	2s	Al	2s	Ca (43)	2s	Ca (44)	2s	Mn*	2s	Fe*	2s	Sc*	2s	Ti*	2s	V	2s	Cr*	2s	Co*	2s	Zn*	2s	Rb	2s	Sr	2s	Y	2s	Zr*	2s	Nb	2s	Cs	2s	Ba	2s	La	2s	Ce	2s	Pr	2s	Nd	2s	Sm
346	0.0107236	7.02457e-05	2.09134	0.0141204	11.1485	0.116668	2.66407	0.0233116	2.80713	0.0191446	1.49664	0.0147997	24.6422	0.170778	156.903	2.33581	240.357	2.33714	48.3471	0.696187	12.3694	0.279645	75.5279	1.02213	341.905	5.97717	0.0316066	0.00488722	0.0174221	0.00095941	255.067	3.311	14.6667	2.09798	0.0103219	0.000879432	bdl		0.00306151	0.000949839	bdl		0.00192173	0.000274269	0.000569359	0.000135194	0.0207223	0.00204211	0.25543
347	0.00997136	6.53183e-05	0.946106	0.00638798	11.1875	0.117076	3.3236	0.0286561	3.536	0.0241155	6.4591	0.0638719	22.0804	0.153024	155.219	2.30419	682.999	10.6845	82.234	1.092	17.398	0.260381	34.9564	0.439957	194.245	3.17054	1.4938	0.272058	0.0961354	0.00541782	583.785	7.6978	36.0683	3.37676	0.322916	0.0140996	0.0919729	0.0186529	5.19614	1.1185	0.00289059	0.000438419	0.00643319	0.000908142	0.0020668	0.000256464	0.0301046	0.0040225	0.23161
348	0.0127529	8.3539e-05	2.24736	0.0151738	11.1988	0.117194	2.52122	0.0239244	2.70954	0.018479	1.23174	0.0121802	24.9001	0.172566	131.281	1.96615	332.016	17.4273	45.9584	0.681117	16.671	0.239549	81.3025	1.03308	343.142	5.9536	0.0648448	0.00842202	0.0128344	0.00246513	235.742	3.06014	15.9632	2.05425	0.18418	0.028583	0.00317567	0.000379813	0.0350814	0.00320308	0.0011296	0.00021374	0.00163599	0.000250048	0.00146333	0.000214559	0.0208414	0.00274998	0.238016
349	bdl		2.68345	0.0181183	11.1385	0.116563	2.26917	0.0193081	2.42506	0.0165389	0.752039	0.00743666	24.0254	0.166504	117.383	1.71714	177.844	8.22084	39.905	0.529906	20.9795	0.272586	102.489	1.28992	375.724	6.5314	9.45252	0.588381	0.148294	0.0106836	198.548	2.57733	4.80549	0.605453	0.0464609	0.0122655	0.581229	0.0613531	70.4258	2.2353	0.00349422	0.000479723	0.00427615	0.00061826	0.00194713	0.000248414	0.030326	0.00246614	0.24059
350	0.00690677	4.52434e-05	2.69898	0.0182231	11.2274	0.117494	2.25284	0.0216616	2.40892	0.0164288	0.735239	0.00727053	24.6573	0.170883	109.483	1.589	536.074	21.9927	40.6536	0.576899	15.7723	0.287727	102.127	1.35205	368.272	6.13021	0.167627	0.00875096	0.0433509	0.00386901	195.511	2.59516	30.6655	1.73246	0.48847	0.0254299	0.01998	0.00245477	0.0806231	0.0122067	0.0017474	0.000268305	0.00640874	0.000899111	0.00115611	0.000192133	0.0202581	0.00201092	0.188433
361	0.0104148	6.84582e-05	2.74424	0.0179784	11.2489	0.106864	2.20783	0.0175061	2.33008	0.0156745	0.679893	0.0074217	24.6862	0.28153	101.001	1.46589	568.765	91.7684	38.6577	0.513096	9.90784	0.210666	107.11	1.34807	371.529	6.05211	0.0251127	0.00132332	0.00928743	0.000692362	164.526	2.45061	0.709949	0.0138831	0.542317	0.0111266	bdl		0.00310275	0.00095406	0.000585943	0.000154886	0.00127304	0.000222393	0.000872738	0.000167118	0.0199665	0.00199765	0.183335
362	0.0113161	7.43823e-05	2.48895	0.0163059	11.2305	0.106689	2.31433	0.0222758	2.48562	0.0167209	0.786021	0.00858019	24.8037	0.28287	125.929	1.90145	537.886	92.5094	42.689	0.569883	14.9677	0.276641	92.3872	1.28485	324.732	5.97112	0.18665	0.0385563	0.0382056	0.00419958	208.639	3.02059	12.3144	2.55943	0.594965	0.145422	0.0311348	0.00815731	0.0168089	0.00222937	bdl		0.000721917	0.000167455	0.000528929	0.000130126	0.017483	0.00186725	0.201004
363	0.00376258	2.4732e-05	2.87469	0.018833	11.1725	0.106138	2.15108	0.0201633	2.30239	0.0154883	0.649649	0.00709156	24.1554	0.275477	105.483	1.56295	128.492	0.938095	33.356	0.450634	17.4179	0.285607	111.491	1.441	383.963	6.66986	1.83039	0.130664	0.0492222	0.00356547	171.918	2.74517	2.01393	0.438472	0.00421042	0.000563812	0.0949699	0.00823153	6.03899	0.200574	0.00312881	0.000364143	0.00455638	0.00042783	0.00159106	0.000228707	0.0227307	0.00238362	0.215347
364	bdl		2.01204	0.0131815	11.0046	0.104543	2.59579	0.0205823	2.72998	0.0183647	1.37937	0.0150572	24.9092	0.284073	113.492	1.64719	475.259	31.0572	49.0901	0.643403	24.8136	0.423063	73.091	0.919915	300.846	4.93221	0.0349954	0.00527983	0.0123341	0.000820364	225.658	3.18233	4.96776	0.567104	0.324836	0.0405688	0.000393765	0.000123574	0.00866415	0.00163599	bdl		0.000699573	0.0001688	0.000616192	0.000143854	0.0205332	0.00281495	0.21779
365	0.00388626	2.5545e-05	2.63718	0.017277	11.0151	0.104642	2.28437	0.018113	2.41512	0.0162466	0.762243	0.00832063	24.3601	0.277811	106.866	1.55102	177.364	1.08925	41.7758	0.547538	11.018	0.271931	99.1699	1.24814	375.811	6.75938	11.8909	0.845599	0.128849	0.0116537	189.837	2.95031	0.592698	0.0139438	0.0277587	0.00239407	0.543002	0.0475954	25.9427	1.48018	0.000388109	0.000129487	0.00509349	0.000459671	0.0010772	0.000191012	0.0266729	0.00384143	0.18826
366	0.0160124	0.00267074	2.6665	0.0174691	11.0811	0.105269	2.28382	0.0262261	2.43887	0.0176424	0.679668	0.00741924	24.4099	0.27838	123.479	1.82842	1266.02	62.5512	38.2545	0.566865	25.0209	0.413675	101.781	1.46798	358.494	6.4572	0.297339	0.0209194	1.01068	0.236981	190.376	3.06179	89.7236	11.8622	1.63922	0.103007	0.0274339	0.00247073	0.252306	0.0285193	0.0344588	0.00720835	0.0831867	0.0174772	0.0165061	0.00359637	0.0979065	0.0172315	0.250613
367	0.00434872	2.85848e-05	2.71546	0.0177898	11.0402	0.104881	2.30907	0.018557	2.45934	0.0165441	0.792741	0.00865355	24.0976	0.274818	111.007	1.69057	248.926	5.82745	40.1788	0.569718	17.9833	0.25736	104.698	1.3303	368.941	5.84204	0.315783	0.0694315	0.0279352	0.00262433	199.264	3.00991	13.6345	0.611183	0.111156	0.00943825	0.0159165	0.00118807	0.730817	0.213802	0.0021589	0.000304164	0.00291979	0.000574	0.00182266	0.000246935	0.0249362	0.00375449	0.220312
368	0.000619532	4.4625e-06	2.0333	0.0133208	11.1019	0.105467	2.64438	0.0249443	2.83166	0.0190487	1.6943	0.0184949	24.641	0.281015	129.653	1.97969	823.17	47.6054	50.3002	0.743437	20.5193	0.377391	75.8376	1.05918	352.218	6.05971	0.0691312	0.00589997	0.031146	0.00338321	252.623	3.5626	50.268	2.38347	0.806795	0.0675669	0.00624218	0.0005965	0.022423	0.00261665	0.00315698	0.000366571	0.00452382	0.00042751	0.00148673	0.000221751	0.0253334	0.00229212	0.259009
369	0.00393932	2.58937e-05	2.61996	0.0171642	10.9934	0.104436	2.33258	0.0184953	2.44457	0.0164447	0.96439	0.0105273	24.0444	0.27421	101.46	1.47256	187.589	1.42262	46.0493	0.603548	10.6367	0.258796	96.6636	1.2166	377.346	6.93874	19.2241	1.44083	0.211016	0.014944	187.782	3.09414	5.64121	1.20351	0.0360088	0.00270633	0.987903	0.0932333	34.0819	2.25215	0.00232706	0.000318589	0.00408384	0.000411685	0.000610771	0.000143973	0.0212498	0.00233077	0.192449
370	0.013828	9.08935e-05	2.66911	0.0174862	11.1044	0.105491	2.22806	0.0224519	2.38571	0.0160488	0.652214	0.00722061	24.6039	0.280592	121.163	1.78126	972.814	26.5983	39.8405	0.522172	18.4775	0.355804	101.236	1.27414	359.347	5.7669	0.0293738	0.00478122	0.010414	0.00074795	198.688	2.90955	72.6086	3.64548	1.09226	0.038334	0.000891867	0.000188647	0.0106695	0.0018053	0.00210906	0.00029972	0.00293559	0.000344607	0.000200066	8.14204e-05	0.0196054	0.00266624	0.206313
371	bdl		2.81067	0.0184136	11.0996	0.105445	2.27107	0.0180076	2.38474	0.0160422	0.643027	0.00701927	24.2088	0.276086	97.6772	1.41766	160.827	1.39705	36.8542	0.483033	8.63209	0.2295	111.356	1.40151	362.491	5.75651	3.03186	0.154462	0.0142927	0.000887722	190.838	2.69127	1.66582	0.0936753	0.00961394	0.000872148	0.264126	0.0264164	9.6706	0.419522	0.00112993	0.000220836	0.00404728	0.000408771	0.000454834	0.000123907	0.014598	0.00174696	0.208662
372	bdl		2.56747	0.0168203	11.0426	0.104903	2.30137	0.0192377	2.43076	0.0163518	0.772653	0.00843426	24.6089	0.280648	114.059	1.724	369.153	7.28488	42.3961	0.570014	16.2323	0.291261	99.332	1.25018	352.989	5.59485	0.0305125	0.00149908	0.0195047	0.00232512	191.883	2.75451	276.429	15.9601	0.292419	0.0129596	8.62236e-05	5.69046e-05	0.00675366	0.0014402	0.00149853	0.000253141	0.00409142	0.000408881	0.000932218	0.000176586	0.0234614	0.00221644	0.212661
373	0.00528223	3.47209e-05	2.23713	0.0146562	11.0902	0.105356	2.48085	0.0258264	2.6406	0.0177634	1.06186	0.0115912	24.8967	0.283931	130.716	2.00661	220.27	2.34178	47.5217	0.693161	10.6417	0.221323	78.2414	1.04787	266.95	5.22133	6.35565	0.711591	0.0682273	0.0061528	218.728	3.17392	0.848856	0.0597115	0.00553653	0.000969219	0.232437	0.0295877	61.0033	6.57935	0.00141815	0.00024641	0.000642312	0.000161426	0.00192818	0.000254588	0.0243409	0.00226101	0.215587
374	0.00578267	3.80104e-05	1.3717	0.00898644	11.0121	0.104614	2.875	0.0227961	3.032	0.0203964	3.24341	0.036037	24.3898	0.27815	152.752	2.21699	931.964	145.554	57.3815	0.752074	25.2881	0.343954	50.5959	0.636794	248.708	3.90685	0.0604559	0.0055815	0.0310565	0.00212625	332.952	4.69543	27.7259	2.86565	0.976874	0.222287	0.00189816	0.000287186	0.0156003	0.00219459	0.00337374	0.00038134	0.0056602	0.000482157	0.00164926	0.000235269	0.0228127	0.00276629	0.180714
375	0.0160349	0.0001054	2.82402	0.0185011	11.1155	0.105596	2.18263	0.0205002	2.32812	0.0156613	0.592867	0.00647173	24.3426	0.277611	129.506	1.92386	205.614	7.80749	38.8513	0.562071	16.107	0.280084	106.617	1.45166	372.785	7.21858	13.4983	0.766222	0.0881235	0.00603359	183.155	2.67606	74.9923	6.64648	0.0883402	0.011941	0.703033	0.0572314	26.0538	1.75063	0.00245047	0.000320451	0.00191128	0.000275444	0.000456668	0.000122093	0.0183465	0.00193116	0.212531
376	0.00772961	5.08079e-05	2.29606	0.0150422	11.0429	0.104906	2.67135	0.0257366	2.85075	0.0191771	1.92941	0.0210614	23.7849	0.271252	135.559	2.06999	336.119	13.6889	48.8518	0.695742	13.8777	0.331112	87.8854	1.27269	356.062	6.43894	0.695094	0.0254599	0.0813728	0.00433829	274.241	3.86746	24.2845	3.10767	0.1712	0.0251283	0.0229911	0.00227841	0.313708	0.0136757	0.00401687	0.000625105	0.00205139	0.0002864	0.00207505	0.00027675	0.0327959	0.00278337	0.212438
377	0.0109631	7.20622e-05	1.8391	0.0120485	11.064	0.105107	2.76516	0.0219252	2.90509	0.0195426	2.22213	0.0242567	24.4854	0.27924	146.357	2.12418	452.455	16.6532	50.9232	0.667428	12.0592	0.2071	68.2755	0.859307	328.309	5.53782	0.105626	0.014282	0.018949	0.00101978	279.93	3.94769	28.1305	2.79907	0.281517	0.0274864	bdl		0.213269	0.0501932	0.000437449	0.000135879	0.000250471	0.000100289	0.000542977	0.000134221	0.0226456	0.0029209	0.21313
378	0.0159654	0.000104943	2.72039	0.0178222	11.0536	0.105009	2.28281	0.0181007	2.41346	0.0162354	0.719161	0.00785035	24.2477	0.276529	138.26	2.00666	526.948	43.2734	38.8849	0.544501	17.189	0.292619	106.886	1.34525	384.524	6.19797	1.78019	0.120505	0.0673533	0.00404966	203.187	2.86543	128.634	8.60326	0.544485	0.0650399	0.0607957	0.00557633	7.93669	0.537689	0.00338882	0.000379549	0.00449413	0.000426254	0.00123077	0.000201851	0.0237578	0.00373119	0.219028
379	0.0155319	0.000102094	1.82987	0.011988	11.0794	0.105253	2.72706	0.0216232	2.89103	0.019448	1.89061	0.0206379	25.0088	0.285209	153.219	2.22377	466.707	29.3075	50.9092	0.667245	13.158	0.209012	65.8712	0.829048	300.902	5.14156	0.149384	0.00948307	0.0746776	0.00420536	272.228	3.83907	75.5922	17.2844	0.313727	0.0469507	0.0323314	0.00315671	0.0617568	0.00711118	0.00609221	0.000806997	0.00744844	0.000866783	0.00173925	0.000240138	0.0276678	0.00278602	0.268071
380	0.0092678	6.09187e-05	2.80605	0.0183833	11.1072	0.105518	2.21783	0.0175854	2.38767	0.016062	0.702726	0.0077564	24.1917	0.275891	138.305	2.00731	670.041	59.1792	36.9209	0.497055	21.082	0.329207	110.102	1.38573	372.139	5.9665	0.412562	0.0280866	0.0583983	0.0046333	202.493	2.85564	23.1563	3.80172	0.819321	0.0844016	0.0351874	0.0033782	0.242231	0.069596	0.00117617	0.00022118	0.00538935	0.000911886	0.00161802	0.000230173	0.0239696	0.00406964	0.257018
381	0.00708632	4.65795e-05	2.22587	0.0145824	11.1476	0.105901	2.53789	0.0201232	2.6595	0.0178906	1.20762	0.0131824	24.7983	0.282809	157.681	2.39139	231.536	3.65154	45.9501	0.602249	11.6902	0.209795	81.6591	1.17372	338.469	6.79554	3.44205	0.922171	0.0528112	0.00803994	244.409	3.44676	7.81875	1.03457	0.0304556	0.00480577	0.12549	0.0330694	47.0445	15.6102	0.00146216	0.000249274	0.00133618	0.000232434	0.00180211	0.000245527	0.0296695	0.00415108	0.248803
382	bdl		2.51678	0.0164883	11.1365	0.105796	2.32149	0.0184073	2.4568	0.016527	0.870866	0.00952148	24.7778	0.282575	97.2404	1.41132	160.364	1.08883	38.3321	0.502403	5.3749	0.153167	94.1602	1.18509	358.258	6.16869	1.04789	0.0531956	0.0515809	0.00335101	196.745	2.77458	0.489186	0.0133927	0.0012028	0.000299643	0.052644	0.00474061	2.58992	0.112659	0.00218513	0.000382052	0.00159384	0.000252485	0.00153646	0.000225322	0.0176908	0.00334453	0.182762
383	0.013174	8.6595e-05	2.57654	0.0168798	11.1098	0.105542	2.25021	0.0178421	2.37728	0.0159921	0.704847	0.0076941	24.7453	0.282204	126.151	1.83092	157.651	0.968183	38.382	0.503056	5.44203	0.14619	97.6073	1.22847	318.5	5.10861	1.41616	0.0794744	0.0191252	0.00277556	197.403	2.78386	4.75602	0.61131	0.00140657	0.000323555	0.0498411	0.00467067	10.7343	0.287093	0.000215651	9.47421e-05	0.00103661	0.000203106	0.000551336	0.000134541	0.0206862	0.00267349	0.192323
384	0.0159244	0.000104674	2.70289	0.0177075	11.1741	0.106153	2.2011	0.022553	2.3503	0.0158105	0.666549	0.00727603	24.7212	0.281929	125.754	1.96995	172.047	1.53997	37.8596	0.53326	13.4158	0.296557	103.371	1.40233	343.501	5.89843	0.0263353	0.0013654	0.0161612	0.0009285	187.108	2.88492	10.204	2.093	0.0085231	0.00166896	0.00076443	0.000171723	0.000186395	0.000235259	0.000110655	6.73943e-05	0.000892852	0.00018722	0.000944091	0.000175005	0.0184995	0.00193147	0.177304
385	0.00942274	6.19371e-05	1.868	0.0122379	11.2027	0.106424	2.66221	0.021109	2.83305	0.019058	1.59671	0.0174297	25.1643	0.286983	153.878	2.23334	390.795	26.462	47.988	0.628958	18.3394	0.306422	66.1039	0.854936	259.837	4.36278	0.0643497	0.00505933	0.0217397	0.00364852	248.921	3.58514	34.7071	3.64578	0.218816	0.0383846	0.00222956	0.000308923	0.00256169	0.000866502	0.00174054	0.00026628	0.00445676	0.000712464	0.00166588	0.00023111	0.0219626	0.0020953	0.24948
386	0.0108533	7.13405e-05	3.63524	0.0238156	11.1541	0.105963	2.06866	0.0197625	2.23136	0.0150105	0.539621	0.00589049	22.5641	0.257329	113.771	1.72754	1439	62.0302	27.7357	0.366772	14.3941	0.233396	159.969	2.33891	424.026	7.99082	0.506532	0.026278	0.0563018	0.00427817	166.092	2.53885	42.4147	2.76295	1.89215	0.0858902	0.0222712	0.00269712	0.556369	0.0227066	0.00348423	0.000503137	0.00896824	0.00127891	0.00291244	0.000421752	0.0279328	0.00328228	0.266433
387	bdl		1.77659	0.011639	11.1528	0.105951	2.65175	0.0236813	2.84739	0.0191545	1.88742	0.0206031	25.0923	0.286162	156.764	2.38349	273.255	6.88518	48.982	0.657634	18.0712	0.339405	62.1945	0.793511	252.271	4.03044	0.0517602	0.00196766	0.0164698	0.000933315	264.935	4.08206	3.49311	0.258551	0.0369846	0.00175057	0.00082087	0.000177494	0.0279821	0.00288644	bdl		0.000326664	0.000112555	0.000583469	0.000136785	0.0153572	0.00174676	0.247093
388	0.00189426	1.24513e-05	2.16521	0.014185	11.3352	0.107683	2.6565	0.0210637	2.79413	0.0187962	1.34236	0.0146531	24.9278	0.284286	170.992	2.48172	274.684	3.52869	47.1302	0.617715	14.6981	0.2569	77.1296	1.0328	318.797	5.76624	6.89854	0.503445	0.0836287	0.00779974	254.456	3.58844	0.686219	0.036844	0.0610757	0.00652439	0.283416	0.0269912	53.0605	3.9197	0.00301852	0.000645897	0.00152596	0.000244477	0.00210361	0.000418841	0.0303145	0.00347895	0.268991
389	bdl		1.78234	0.0116767	11.1966	0.106367	2.62359	0.0269689	2.81266	0.0189208	1.84165	0.0201061	25.335	0.28893	162.958	2.47535	235.25	2.14432	45.6246	0.698321	9.77081	0.274818	62.9964	0.862001	262.466	4.72908	0.0609127	0.00643302	0.0187647	0.00100105	261.136	3.75579	3.91247	1.14042	0.000750936	0.000233654	0.00269133	0.000346334	0.0481712	0.00580455	0.000544309	0.000148989	0.0018415	0.000268311	0.000858263	0.0001663	0.0189631	0.00306792	0.22749
390	0.00568207	3.73491e-05	1.80811	0.0118455	11.2909	0.107262	2.60769	0.0276111	2.80157	0.0188463	1.8972	0.0209356	25.1552	0.286879	162.597	2.54858	261.916	5.11731	45.7004	0.670795	14.1384	0.244565	63.4918	0.860376	269.336	4.41099	0.996129	0.043884	0.0834257	0.00668191	269.904	3.8063	0.681944	0.0331503	0.0368389	0.00172557	0.0534073	0.00424324	0.355631	0.0252096	0.00340589	0.000369202	0.000741387	0.000167391	0.00159666	0.000223646	0.0227874	0.00211154	0.233534
391	0.00497992	3.27338e-05	2.40319	0.015744	11.2265	0.106651	2.43498	0.0232829	2.58596	0.0173959	0.961216	0.0107961	24.8922	0.28388	165.474	2.40163	271.784	3.84038	41.6512	0.608523	13.0639	0.264282	88.8634	1.11842	330.154	5.58692	0.041753	0.00385014	0.0187775	0.00300846	252.92	3.56679	0.599179	0.0118696	0.105527	0.00811472	bdl		bdl		0.000602287	0.000155634	0.000821641	0.000177758	0.00016912	7.32444e-05	0.0205312	0.0026937	0.224972
392	0.0640934	0.00571203	1.63607	0.0107184	11.2949	0.1073	2.73522	0.0306759	2.91745	0.0196258	2.44265	0.0266639	25.0157	0.285288	166.049	2.72319	255.158	2.64803	50.0249	0.790744	9.21451	0.156009	57.0882	0.777824	242.729	4.01559	3.879	0.15875	0.149771	0.00956137	290.108	4.09123	0.514528	0.0117742	0.00403614	0.000534917	0.185625	0.0136981	9.86982	0.338102	0.00662439	0.000812776	0.00168294	0.000251662	0.00245425	0.000441016	0.0272947	0.00275322	0.22261
393	0.00895874	5.88872e-05	2.17129	0.0142248	11.3337	0.107669	2.60465	0.0226704	2.75476	0.0185314	1.21062	0.0134233	25.1762	0.287118	173.745	2.53575	230.365	1.58448	45.8065	0.612025	10.5978	0.177789	75.9832	0.982193	274.037	4.86353	3.22286	0.38528	0.0770077	0.00654545	261.203	3.6836	24.132	1.20459	0.00807566	0.00116499	0.186472	0.0246706	6.72921	0.86716	0.0001204	6.89975e-05	0.0011545	0.000209316	0.000675639	0.00014549	0.0204831	0.00332516	0.26348
394	0.00128134	8.42246e-06	2.26778	0.014857	11.2093	0.106487	2.44414	0.0248236	2.60733	0.0175396	1.01504	0.0110802	25.1209	0.286488	158.673	2.39691	661.104	56.8509	41.1156	0.581665	14.2621	0.29058	81.4027	1.13102	284.104	5.16066	0.585001	0.0152759	0.0301592	0.00198298	237.992	3.38362	13.0214	1.1631	0.71772	0.0880707	0.020655	0.00290368	1.08161	0.0318687	0.00157433	0.0002541	0.00205308	0.000283784	0.00166401	0.000232198	0.0230386	0.00318057	0.225003
395	0.0203852	0.00275668	2.37178	0.0155383	11.2232	0.106619	2.40244	0.0203329	2.57001	0.0172886	0.959389	0.0104727	24.9592	0.284644	185.265	2.73217	387.987	15.8114	41.5227	0.581464	13.5187	0.230437	85.6762	1.10432	322.842	5.70975	3.32432	0.268206	0.062319	0.00962979	248.087	3.55992	6.41454	0.622578	0.252269	0.0161117	0.135005	0.0130567	7.94149	0.650313	0.00328484	0.000368425	0.00459888	0.000426347	0.00261739	0.000514863	0.0275239	0.00521886	0.206813
*BIR-1G is used as the primary reference material
[truncated: 29 more columns]

## Sheet: S3e_OM20-18
Table S3e. LASS-ICP-MS trace element analyses of garnet from sample OM20-18B (Session 1).
	Major elements (wt %)														Trace elements (μg/g)
Analyses	Na	2s	Mg*	2s	Al	2s	Ca (43)	2s	Ca (44)	2s	Mn*	2s	Fe*	2s	Sc*	2s	Ti*	2s	V	2s	Cr*	2s	Co*	2s	Zn*	2s	Rb	2s	Sr	2s	Y	2s	Zr*	2s	Nb	2s	Cs	2s	Ba	2s	La	2s	Ce	2s	Pr	2s	Nd	2s	Sm
183	0.00305647	1.98506e-05	1.04369	0.00735063	11.0028	0.0842922	3.30654	0.0225959	3.49503	0.0239912	4.19957	0.0268737	24.4787	0.155054	29.8851	0.490954	411.815	4.4631	105.846	0.979176	42.9507	0.549792	29.6333	0.374755	85.2718	1.36453	0.0286821	0.00144691	0.0126418	0.000823906	230.007	3.13641	0.53859	0.017257	0.845479	0.0589722	bdl		0.0100904	0.00175368	0.00173517	0.000268945	0.0043183	0.000717776	0.00516097	0.000978592	0.161621	0.00963564	1.6097
184	bdl		1.83027	0.0128905	11.0419	0.0845913	2.9698	0.0202947	3.12608	0.0214586	0.535608	0.00394155	26.6189	0.168611	28.8776	0.44206	300.523	3.22426	119.094	1.10174	38.6789	0.506012	56.6841	0.71342	115.353	1.80127	0.0409263	0.00175362	0.0276149	0.00473972	153.816	2.72397	0.565212	0.0192445	0.0676108	0.00270561	0.000976029	0.000198362	0.0427628	0.0036342	0.000755399	0.000177066	0.00402913	0.000403877	0.00447519	0.000660057	0.160124	0.00745537	1.75539
185	bdl		1.46866	0.0103437	11.0265	0.0844736	3.48309	0.0238024	3.68265	0.0252791	0.705653	0.00544114	26.8153	0.169855	33.6842	0.488882	447.912	5.15105	90.7023	0.839083	62.7299	0.683594	49.5863	0.624088	109.25	1.70581	0.0211083	0.00122511	0.0112124	0.000771965	202.188	2.67573	0.769152	0.023145	0.692074	0.0383159	bdl		bdl		bdl		0.00323323	0.000360439	0.00527635	0.000774535	0.195653	0.010581	2.26048
186	bdl		1.5802	0.0111293	11.0495	0.08465	3.22286	0.0220241	3.42	0.0234761	0.285469	0.0019	27.3525	0.173258	23.3411	0.338765	397.912	4.26914	103.366	0.956233	50.1283	0.552386	57.0912	0.718543	113.092	1.86054	0.0294181	0.00146432	0.0127861	0.000827408	180.239	2.38527	0.670917	0.020554	0.2565	0.0214426	bdl		0.00703522	0.00146061	bdl		0.00274748	0.000332644	0.00403675	0.000426246	0.16373	0.00931271	1.94284
187	0.00321522	2.08816e-05	1.49818	0.0105516	11.1329	0.0852887	3.36444	0.0229916	3.55072	0.0243734	0.488944	0.00312883	27.2217	0.172429	20.2673	0.294153	642.153	9.16	123.11	1.13889	110.864	1.15646	56.4006	0.709851	109.418	1.76868	0.01714	0.00109207	0.0199266	0.00103393	161.019	2.26397	1.13982	0.144394	6.20197	0.186138	4.8501e-05	4.21783e-05	0.0219927	0.00257162	0.00137157	0.00023665	0.00652014	0.000854888	0.00392934	0.000472668	0.153753	0.00764986	1.80561
188	bdl		1.57502	0.0110928	11.0702	0.0848081	3.60706	0.0246496	3.80465	0.0261165	0.690882	0.00778171	26.618	0.168605	32.7012	0.474615	461.609	4.95253	102.039	0.971277	70.4532	0.797682	51.7087	0.6508	107.259	1.67763	0.033489	0.00643619	0.0212275	0.00376067	197.919	2.61925	0.826194	0.034802	0.336539	0.0457137	1.92529e-05	2.64803e-05	0.00968625	0.00169786	0.00475372	0.000441474	0.00621849	0.00057355	0.00641812	0.000666189	0.210437	0.00979802	2.22336
189	0.00590934	3.83789e-05	1.70918	0.0120377	11.1983	0.0857898	3.3606	0.0229654	3.52537	0.0241994	0.28532	0.00182581	26.99	0.170962	20.0155	0.290499	416.369	4.46715	115.669	1.07005	97.4353	1.29317	60.3015	0.758947	112.558	1.73608	0.0355585	0.00160736	0.0379379	0.0029893	178.969	2.36846	3.41008	0.681084	0.0785531	0.0121695	0.00178435	0.000274152	0.0380271	0.00481848	0.0119908	0.00107048	0.0821483	0.00458694	0.00827564	0.000682591	0.172886	0.00768219	1.95837
190	0.00680634	4.42046e-05	1.5486	0.0109067	11.2352	0.0860719	3.28231	0.0224304	3.4821	0.0239024	0.500498	0.00382863	27.4696	0.174	28.2814	0.410467	464.472	6.38144	99.6794	0.92213	76.344	0.846406	53.4038	0.672134	105.163	1.55709	0.11859	0.00741367	0.486229	0.0249543	181.812	2.40608	0.708403	0.0224505	2.28142	0.108598	0.00381179	0.000427638	0.744411	0.0453844	0.51529	0.0305051	1.55213	0.0846014	0.17912	0.0104079	0.832926	0.0354932	2.23083
191	0.00317609	2.06275e-05	1.98655	0.0139911	11.1541	0.0854509	2.87541	0.0196497	3.05091	0.0209426	0.257324	0.00164666	26.7271	0.169296	27.5471	0.39981	320.903	3.44292	121.657	1.12544	34.7815	0.424623	62.1628	0.782374	118.787	1.81338	0.0281381	0.00140996	0.0785148	0.00306207	112.626	1.69488	0.555505	0.0161042	0.0171571	0.00167977	0.00177201	0.000271939	0.0600158	0.00827806	0.0456318	0.00284965	0.127234	0.00449621	0.0235806	0.00169597	0.238991	0.00797394	1.81046
192	0.00470469	3.05551e-05	1.69235	0.0119192	11.0531	0.0846776	3.1155	0.0212904	3.3117	0.0227327	0.392101	0.00250912	27.0056	0.17106	20.8104	0.341086	384.88	4.12932	120.699	1.11658	37.7284	0.458557	55.4254	0.697577	105.19	1.66886	0.0149211	0.00101513	0.00922134	0.000693993	163.622	2.35394	0.590702	0.0200073	0.0394052	0.00277696	bdl		0.013882	0.00203711	bdl		0.00316438	0.000354187	0.00365224	0.000441742	0.152063	0.00913246	1.68764
193	0.000636941	4.49102e-06	1.82349	0.0128427	10.9837	0.0841454	2.8234	0.0192943	2.98798	0.0205106	0.826526	0.00546518	26.2406	0.166215	36.745	0.533306	339.806	3.96956	110.473	1.02198	37.7664	0.547781	52.1156	0.655921	105.826	1.59669	0.0743098	0.00661342	0.155998	0.00658544	145.982	2.15318	0.499763	0.0199447	0.184306	0.00725266	0.000625836	0.00015499	0.563876	0.0259822	0.0347874	0.00197991	0.0317514	0.0026068	0.014691	0.00124766	0.213657	0.0110471	1.78178
194	0.00480272	3.11918e-05	1.62451	0.0114413	10.9501	0.0838878	3.2409	0.0221474	3.45106	0.0236893	1.27907	0.00818495	25.7884	0.163351	17.1481	0.248883	378.819	4.06429	136.888	1.26635	33.9235	0.449366	49.0321	0.617113	103.939	1.65093	0.026636	0.00137571	0.0268785	0.00120847	148.762	2.21964	5.46086	1.16757	0.0169484	0.00140119	bdl		0.0591046	0.00424229	0.0102	0.000650873	0.0101927	0.000640919	0.00842842	0.00203324	0.140821	0.00732927	1.49264
195	0.0145416	9.44421e-05	1.84729	0.0130103	11.0252	0.0844635	2.94366	0.0201161	3.12141	0.0214265	0.553736	0.00413976	26.3008	0.166596	29.9763	0.447336	325.95	3.49707	114.831	1.0623	34.3742	0.440682	56.6811	0.713382	110.751	1.76912	0.00800008	0.00073367	0.0365528	0.00142178	154.058	2.17996	0.554784	0.0156729	0.0534385	0.00228734	0.00236272	0.000321842	0.0632177	0.00438098	0.0249007	0.00103361	0.0309337	0.0094726	0.0167239	0.00512612	0.211889	0.0187146	1.84712
196	0.00664872	4.31808e-05	1.74644	0.0123001	10.9381	0.0837959	3.14077	0.0214631	3.31132	0.0227301	0.688301	0.00616328	26.3743	0.167061	34.3349	0.498326	381.078	4.08853	106.428	0.984558	36.7886	0.531888	52.8088	0.685676	110.654	1.80369	0.00995579	0.000826257	0.0136904	0.000852915	154.668	2.24135	0.578609	0.0165019	0.0520564	0.00219142	bdl		0.00808145	0.001557	bdl		0.00476211	0.000669671	0.00443116	0.000498471	0.169741	0.00922816	1.88529
197	0.00602981	3.91613e-05	1.87425	0.0132002	11.0946	0.084995	2.98374	0.02039	3.15926	0.0216863	1.14074	0.00729979	25.9355	0.164282	35.0245	0.627098	369.262	3.96175	126.637	1.17151	49.9396	0.550536	52.7495	0.686689	106.461	1.63051	0.0103128	0.000838744	0.0190317	0.00271789	148.937	2.82855	0.617831	0.0179473	0.0811165	0.00330794	bdl		0.0245593	0.00271628	0.000565808	0.000151522	0.00416038	0.000767862	0.00646008	0.000645706	0.181186	0.00846523	2.02574
198	0.011264	7.31554e-05	2.42563	0.0170835	11.1936	0.0857533	2.65112	0.018117	2.86362	0.019657	0.238115	0.00152374	25.696	0.162765	31.4524	0.45649	204.162	2.26177	117.836	1.0901	17.2824	0.285955	61.7676	0.7774	127.056	1.96601	0.00147645	0.000305533	0.0100793	0.000708323	61.5144	0.857476	0.420151	0.0140934	-0.000746005	0.000226495	0.00120918	0.000215893	0.00324632	0.000957472	0.000821233	0.000177916	0.00255464	0.000309964	0.00553249	0.000677843	0.191603	0.00932515	1.90796
199	0.0144064	9.35638e-05	1.90309	0.0134034	11.0168	0.084399	2.79735	0.0191163	2.99972	0.0205912	0.30171	0.00193069	26.7021	0.169138	30.8731	0.448083	300.695	3.22611	108.739	1.00594	15.3185	0.243792	62.6753	0.788824	112.842	1.64972	0.0318119	0.0014953	0.0261647	0.00439317	137.338	1.95175	0.515077	0.0177878	0.00850175	0.00133961	0.00381908	0.000427232	0.0177497	0.00227255	0.0151928	0.00226278	0.0210851	0.00260762	0.0112729	0.000933053	0.219123	0.00746442	1.83419
200	0.0155544	0.00010102	1.06128	0.00747455	10.6566	0.0816397	3.19915	0.0218621	3.3838	0.0232276	3.49777	0.0223828	24.7032	0.156477	18.9985	0.275738	358.399	3.88885	105.402	0.975069	9.69314	0.262887	28.4896	0.358567	79.0007	1.29501	0.0440505	0.00196164	0.00899832	0.00074804	200.466	2.65294	0.510464	0.0187728	0.0436264	0.00327	bdl		0.00319111	0.00106458	bdl		0.00249591	0.000343384	0.00409115	0.00039725	0.127083	0.00812664	1.51703
211	0.00428581	2.76844e-05	1.3505	0.00915101	11.3849	0.0853056	3.28507	0.0246501	3.45442	0.02544	1.68194	0.0122978	26.7549	0.171782	11.8431	0.180645	377.311	4.79645	154.906	2.71843	8.48735	0.210676	43.7677	0.550855	98.3089	1.52089	0.0253651	0.00130662	0.0424404	0.00348411	168.059	1.82783	0.462067	0.0155972	1.67691	0.113159	0.00149491	0.000242445	0.0371122	0.00554288	0.0102164	0.00103734	0.00480423	0.000621486	0.00692916	0.000735079	0.135922	0.00838392	1.55129
212	0.00153225	9.89764e-06	1.48759	0.0100799	11.0192	0.0825654	3.28321	0.0246362	3.46554	0.0255219	0.503609	0.00515547	27.1944	0.174604	26.6811	0.387241	389.077	3.89858	105.506	1.85152	56.2561	0.714715	55.0111	0.692364	112.459	1.88679	0.0279763	0.00143552	0.0115437	0.00079158	194.666	2.1172	0.685532	0.0240514	0.13082	0.027691	0.00249124	0.000337688	0.00323214	0.00099613	bdl		0.00297078	0.000348806	0.00454152	0.000636956	0.164955	0.00643763	1.93569
213	0.00542675	3.50544e-05	1.44151	0.00976768	11.0831	0.0830443	3.04654	0.0228603	3.2032	0.02359	0.331381	0.00227835	27.6293	0.177396	26.982	0.391608	335.986	3.3666	107.518	1.88682	41.7456	0.489923	54.8608	0.690472	110.455	1.71015	0.0593948	0.00426595	0.0331937	0.0013855	215.729	2.34629	0.618158	0.0223562	0.0387814	0.00214868	0.00171041	0.000273829	0.0336932	0.0039498	0.00805558	0.000890389	0.0129656	0.00115321	0.00782467	0.000632187	0.162817	0.0102074	1.77441
214	0.00695335	4.49155e-05	1.4241	0.00964975	10.9114	0.0817581	3.54107	0.0265711	3.71995	0.0273955	0.689431	0.00696527	26.659	0.171166	33.0805	0.480121	430.605	4.31469	100.926	1.77113	66.8295	0.910606	47.9955	0.606402	106.819	1.76356	0.0652703	0.00471806	0.0239245	0.00116789	194.939	2.12017	0.739794	0.0271356	0.185529	0.0101635	0.00450283	0.000489036	0.0322167	0.00319952	0.0107225	0.00122315	0.00972467	0.00135034	0.00743623	0.000987481	0.204872	0.00995518	2.32354
215	0.00737767	4.76565e-05	1.50256	0.0101814	10.9245	0.0818559	3.39347	0.0254635	3.56635	0.0262644	0.884026	0.00607795	26.5857	0.170696	28.1079	0.407949	389.232	3.90012	97.735	1.71514	50.7651	0.64588	47.2316	0.594451	105.903	1.6852	0.0300343	0.00150593	0.0135573	0.00191768	186.792	2.03156	0.720582	0.0245123	0.131542	0.00525535	bdl		0.00499182	0.00125163	0.000996936	0.000206711	0.00361855	0.000659591	0.00604626	0.000802156	0.196579	0.0103724	2.24476
216	bdl		1.63651	0.011089	10.9441	0.0820028	3.28699	0.0246645	3.45918	0.0254751	0.277953	0.00191101	26.9872	0.173273	19.1075	0.285574	414.48	4.15311	107.249	1.8821	90.9005	1.12246	60.4428	0.760726	112.099	1.74497	0.0277955	0.00145091	0.0161685	0.000955807	175.151	2.32031	0.683134	0.0250756	0.0597316	0.00333267	0.000400162	0.000126806	0.00744154	0.00153582	0.00054411	0.00015333	0.0027902	0.000343094	0.00421308	0.000805881	0.160206	0.00747183	1.99207
217	bdl		1.3413	0.00908864	11.0039	0.0824507	3.56243	0.0267314	3.75128	0.0276263	1.25723	0.00864386	26.6264	0.170957	36.6063	0.531292	595.829	6.24679	154.29	2.70762	111.648	1.21752	42.4264	0.534437	99.881	1.61898	0.0996375	0.00908449	0.259434	0.0317743	188.712	2.05244	0.817332	0.0289586	2.19523	0.0927143	0.00268615	0.00035416	0.220895	0.027778	0.214276	0.0182543	1.01924	0.0901463	0.0956574	0.0122369	0.559835	0.0379982	2.40252
218	0.0099156	6.40503e-05	1.48914	0.0100905	10.921	0.0818297	3.34436	0.025095	3.51494	0.0258858	0.656968	0.00451686	26.9048	0.172745	32.3819	0.469981	418.095	4.18934	103.664	1.81919	46.8311	0.623143	50.3079	0.63317	107.709	1.72364	0.0281928	0.00145305	0.0417556	0.0085306	186.514	2.05265	0.723601	0.0245363	0.185392	0.0185556	bdl		0.0628442	0.00448859	0.0245113	0.00673247	0.0348745	0.00915878	0.0129071	0.00233339	0.207137	0.0132303	2.05611
219	0.0207575	0.00254436	1.37366	0.00930792	11.0918	0.0831097	3.54181	0.0265767	3.71949	0.0273922	1.07885	0.00741744	26.771	0.171885	35.2809	0.512057	451.606	4.52512	134.168	2.3545	61.7962	0.696694	44.2704	0.557182	97.7693	1.45585	0.0261476	0.00138983	0.0295949	0.00464937	194.053	2.11054	0.736742	0.0272974	0.116379	0.00441394	bdl		0.0173148	0.00232228	0.00707729	0.000798563	0.00959961	0.000837423	0.00625856	0.000594409	0.197977	0.00828252	2.12989
220	0.00876044	5.65885e-05	1.24655	0.00844665	11.2529	0.0843164	3.28666	0.0246621	3.48008	0.025629	2.16092	0.014857	26.4545	0.169853	26.8952	0.390349	430.308	7.04905	136.038	2.38732	70.5037	0.798517	32.6401	0.410804	72.9572	1.11817	0.00797414	0.000748373	0.00575746	0.000556463	146.647	1.60932	0.571375	0.0210709	0.524102	0.0509197	bdl		0.00536798	0.00128682	bdl		0.0036161	0.000385997	0.00426008	0.000556743	0.163122	0.00917004	1.8893
221	bdl		1.2097	0.00819695	11.2438	0.0842485	3.42169	0.0256753	3.60913	0.0265794	2.3476	0.0161405	26.2487	0.168532	27.418	0.403215	464.565	5.37335	138.348	2.43348	77.8373	0.882189	32.526	0.424219	81.3099	1.26164	0.0139272	0.000985059	0.020515	0.00450031	159.688	1.73678	0.665309	0.024405	1.38927	0.141237	0.00296645	0.000371724	0.0323805	0.00652022	0.0113544	0.00119724	0.0105162	0.00128693	0.00753144	0.00111505	0.2113	0.00994106	2.11686
222	0.018797	0.00012142	1.57684	0.0106847	10.9196	0.0818192	3.55369	0.0266658	3.74586	0.0275863	1.03911	0.00714417	26.193	0.168174	37.3981	0.542785	402.113	4.0292	96.8825	1.70018	53.848	0.649812	47.6761	0.600046	107.654	1.76732	0.0300439	0.00149971	0.0125153	0.000830145	201.276	2.18909	2.02957	0.185336	0.170495	0.00653587	bdl		0.0233923	0.00270751	0.00102873	0.000209083	0.00467998	0.00073624	0.00582231	0.000649829	0.210508	0.00909757	2.26371
223	0.0200618	0.00325288	1.43848	0.00974715	11.013	0.082519	3.58826	0.0269252	3.78079	0.0278436	1.18964	0.00817916	26.3347	0.169084	38.7478	0.562373	459.005	4.59926	135.515	2.37814	64.2188	0.787234	44.1615	0.555811	97.6477	1.5218	0.0872931	0.00714607	0.330078	0.0259519	202.62	2.20372	0.782167	0.0284828	0.168323	0.00503864	0.00226399	0.000317249	0.649872	0.0571092	0.27904	0.0127838	0.362119	0.0105278	0.106192	0.00798088	0.612792	0.0308329	2.50839
224	bdl		1.67945	0.01138	11.0251	0.0826097	3.05951	0.0229577	3.2258	0.0237564	0.269449	0.00241107	27.2319	0.174844	20.6301	0.299418	383.516	3.84285	128.477	2.25463	97.6511	1.11914	62.8543	0.791077	113.028	1.72297	0.0150762	0.00103839	0.0146534	0.000896887	165.122	2.09092	0.615371	0.025741	0.0158427	0.00141895	0.00162636	0.000264919	0.00137991	0.000651693	0.000710866	0.000173068	0.00517841	0.000837314	0.00378059	0.000356191	0.159563	0.00714891	1.8476
225	0.00347447	2.24435e-05	1.45857	0.00988331	11.2067	0.0839704	3.52363	0.0264402	3.70115	0.0272571	0.817821	0.00562277	26.9752	0.173197	28.824	0.418342	438.93	4.3981	118.714	2.08331	88.1984	1.03462	49.6411	0.624778	109.15	1.62703	0.0295921	0.00147162	0.035527	0.00315571	195.021	2.12107	0.764404	0.027301	0.494615	0.0373538	bdl		0.0498838	0.00667709	0.0144073	0.00217733	0.0127781	0.00169186	0.00828431	0.000748011	0.195064	0.00731098	2.07239
226	bdl		1.54296	0.0104551	11.0422	0.0827376	3.38586	0.0254065	3.57104	0.0262989	0.357221	0.00368957	27.0535	0.173699	25.6739	0.372623	409.185	4.10006	91.1893	1.60027	59.9327	0.81894	55.4146	0.697441	110.605	1.6548	0.0191685	0.0011703	0.0137256	0.000862086	193.72	2.10692	15.0813	2.74918	0.192292	0.032839	bdl		bdl		bdl		0.00261321	0.000325716	0.00458184	0.000667262	0.171112	0.011009	2.1725
227	bdl		1.49018	0.0100975	11.1548	0.0835813	3.43657	0.025787	3.64572	0.0268489	0.419081	0.00449274	27.2415	0.174906	22.4573	0.325939	461.842	6.6849	109.807	1.92699	73.698	0.918921	55.179	0.694476	106.686	1.60916	0.0218595	0.0012523	0.0157773	0.00267741	181.114	1.96981	0.891439	0.0543676	1.81291	0.219472	0.000836338	0.000183001	0.00638888	0.00139337	0.00168396	0.000264713	0.0046767	0.000666657	0.0041604	0.000436029	0.183208	0.0119788	2.00556
228	0.00222207	1.43536e-05	1.47334	0.00998339	11.0334	0.0826718	3.40585	0.0255565	3.60681	0.0265623	0.99359	0.00683124	26.5384	0.170392	28.2305	0.416558	498.029	6.81005	133.42	2.34138	57.0682	0.737425	46.4386	0.584471	105.158	1.79868	0.0123776	0.000938614	0.0212381	0.00210652	171.995	2.29186	0.69684	0.0246464	1.09258	0.0712848	bdl		0.00766087	0.00153927	0.000988169	0.000204371	0.00521854	0.000749912	0.00521218	0.0008863	0.173474	0.00873967	2.03751
229	0.0109429	7.06864e-05	1.64703	0.0111603	11.1767	0.083746	3.24156	0.0243236	3.4071	0.0250916	0.692677	0.00476237	26.7093	0.17149	35.113	0.50962	420.456	4.21299	108.774	1.90885	39.9431	0.566025	52.1702	0.656608	105.491	1.59386	0.0326335	0.00154835	0.0400359	0.00288127	197.6	2.14912	0.742329	0.026206	0.457309	0.0395571	bdl		0.0270883	0.00386497	0.0139516	0.000946576	0.0466149	0.00149789	0.00899146	0.000741345	0.209988	0.00740302	1.91438
230	0.00915029	5.91068e-05	1.6931	0.0114725	11.0637	0.0828991	3.20837	0.0240746	3.38379	0.0249199	0.24619	0.00169263	26.862	0.17247	26.9948	0.391794	355.171	3.55884	165.438	2.90326	29.9693	0.366319	63.3698	0.797565	112.982	1.86037	0.0235206	0.00130995	0.00426924	0.000477923	183.503	2.12397	0.524717	0.0217316	0.000914675	0.000263174	bdl		0.00814006	0.00158353	bdl		0.00452077	0.00061491	0.00477527	0.000610688	0.169177	0.00832143	1.86547
231	0.0058956	3.8083e-05	1.57547	0.0106754	11.1446	0.0835054	3.3766	0.0253369	3.53981	0.0260689	0.234338	0.00161466	27.114	0.174088	22.8186	0.405053	373.565	3.74315	169.26	3.03316	13.7537	0.396657	62.6799	0.788882	110.648	1.70506	0.0231524	0.00129087	0.0341597	0.00493305	175.898	1.91308	0.54295	0.0192356	0.000453471	0.000184041	bdl		0.102126	0.00569206	0.000713842	0.000172208	0.00357675	0.00062854	0.00359068	0.000597572	0.137071	0.00574972	1.64595
232	0.00722268	4.66553e-05	1.58303	0.0107266	11.1926	0.0838648	3.32258	0.0249316	3.52414	0.0259535	0.24657	0.00169525	27.2316	0.174843	12.9667	0.205207	424.558	4.25409	103.157	1.9413	10.8686	0.308115	60.9416	0.767004	111.533	1.69478	0.00820402	0.000748769	0.0159907	0.000925866	155.575	2.34658	0.634792	0.0225522	0.0188842	0.00268931	0.00125803	0.000226941	0.00520365	0.00124897	bdl		0.00237732	0.000308164	0.0029706	0.000385549	0.144647	0.00754461	1.68559
233	0.0075071	4.84925e-05	1.41737	0.00960414	11.0562	0.082843	3.41153	0.0255991	3.59277	0.0264589	0.244826	0.00168325	27.3785	0.175786	18.4335	0.301524	421.429	4.22274	101.519	1.80129	78.7072	0.99134	58.9093	0.784533	111.44	1.76766	0.0134461	0.000967804	0.00695463	0.00060564	189.912	2.36469	0.749894	0.0275331	0.0552075	0.0030811	bdl		0.00218071	0.000810048	bdl		0.00285713	0.000415118	0.00291796	0.00038647	0.160054	0.0102515	2.1141
234	bdl		1.41217	0.0095689	11.0567	0.0828468	3.43926	0.0258071	3.61614	0.026631	0.256622	0.00176435	27.3807	0.1758	20.1401	0.309893	439.917	4.40799	100.692	1.76703	91.2089	1.15668	57.8973	0.728688	115.55	1.78011	0.0300626	0.00148852	0.0124134	0.000820131	181.584	1.99018	155.876	10.6822	0.565666	0.077638	bdl		0.011961	0.00191499	0.00143901	0.000245522	0.00467721	0.000622754	0.00427318	0.000423847	0.176746	0.00867614	2.14087
235	0.010375	6.70181e-05	1.49657	0.0101408	11.2342	0.0841765	3.41797	0.0256474	3.61244	0.0266038	0.269491	0.00185283	27.4149	0.176019	17.5032	0.293559	436.695	4.37571	93.3627	1.63841	70.1679	0.787618	57.3606	0.721934	113.447	1.70949	0.0434263	0.00179885	0.0954877	0.0165129	187.056	2.05254	0.895775	0.0403765	0.0641153	0.00435351	0.00256452	0.000339669	0.140364	0.02694	0.0373348	0.00787235	0.0271912	0.00558238	0.0192656	0.003111	0.228952	0.0136923	2.16423
236	bdl		1.74654	0.0118346	11.0399	0.0827206	3.04325	0.0233183	3.20057	0.0235706	0.362156	0.00302725	26.8258	0.172237	21.6789	0.345978	324.716	3.51995	112.433	1.97307	27.4468	0.48657	58.8478	0.740652	113.732	1.88206	0.0941543	0.00924663	0.361173	0.0338127	147.487	2.29813	0.555107	0.0206645	0.0292117	0.00285992	0.00536287	0.000541925	0.637899	0.0582219	0.303482	0.0286439	0.568568	0.0720002	0.0915337	0.0041731	0.604102	0.0519389	1.8632
237	bdl		1.5364	0.0104107	10.9826	0.0822913	3.36996	0.0252872	3.54931	0.0261389	1.76388	0.0121272	25.4885	0.163651	16.1646	0.292022	864.85	29.9499	248.949	4.36878	26.0458	0.399646	42.6513	0.536804	103.369	1.67691	0.139409	0.00742795	0.525208	0.0180725	148.362	2.07643	21.0835	3.375	2.3543	0.191229	bdl		0.924903	0.0795855	0.228887	0.0202276	0.231907	0.0160621	0.072822	0.0070919	0.411263	0.0195089	1.85098
238	0.0148747	9.60838e-05	1.48202	0.0100422	11.1384	0.0834587	3.09317	0.0232102	3.26464	0.0240424	1.00588	0.00823395	26.9103	0.17278	13.1894	0.191428	369.329	3.7007	147.009	2.57984	9.20902	0.167498	49.4185	0.621975	103.814	1.62114	0.123574	0.0102039	0.193154	0.00879739	141.967	1.93969	18.9176	3.56478	0.0146317	0.00167937	0.00658822	0.000620732	0.319514	0.0166835	0.129862	0.00617338	0.234487	0.00964694	0.0529286	0.00194485	0.305466	0.011616	1.44375
239	0.0116331	7.51446e-05	1.02807	0.00696625	11.0939	0.0831252	3.27375	0.0245652	3.45479	0.0254427	4.71694	0.0324304	24.1246	0.154894	23.5027	0.34111	670.008	10.391	136.002	2.38668	30.5062	0.485261	23.9358	0.301253	86.9497	1.4254	0.0329626	0.00155013	0.418622	0.146311	181.374	1.97264	16.2786	1.39035	2.15443	0.159304	bdl		0.504852	0.109487	0.0385628	0.00260133	0.0353506	0.00253342	0.0154616	0.000856292	0.18303	0.00987956	1.46596
240	0.0222452	0.00248035	1.46204	0.00990683	11.2057	0.0839631	3.29621	0.0247338	3.50388	0.0258043	1.97155	0.013555	25.5667	0.164153	15.8435	0.235527	388.649	7.99236	160.005	2.80791	37.9292	0.479724	39.7056	0.49973	99.2712	1.45741	0.0529011	0.00292792	0.357157	0.0158384	155.365	1.9283	0.95138	0.121621	0.966462	0.168424	bdl		0.463339	0.0234689	0.0784211	0.00559028	0.228699	0.0214116	0.0341216	0.00326703	0.264585	0.014899	1.77409
241	0.0151983	9.81742e-05	1.75896	0.0119187	11.0602	0.082873	2.99322	0.0224602	3.15696	0.0232494	0.245945	0.00169094	26.9171	0.172823	33.8221	0.490883	349.055	3.49755	116.269	2.04039	29.9224	0.402261	56.3094	0.708703	115.027	1.8911	0.0144027	0.00100253	0.014439	0.000880163	149.304	2.02035	0.557697	0.0206145	0.0236917	0.00253346	bdl		0.00382362	0.0010724	bdl		0.00371781	0.000386866	0.00489166	0.000665649	0.205611	0.0114348	2.12873
242	0.0116031	7.49505e-05	1.40235	0.00950238	11.1655	0.0836622	3.61281	0.0271094	3.81458	0.0280924	0.814811	0.00560207	26.7333	0.171643	30.3535	0.440541	453.189	4.54097	113.969	2.02581	36.5604	0.451051	49.3627	0.621273	108.894	1.6887	0.0267258	0.00410656	0.012813	0.00082002	195.501	2.12629	0.706422	0.0253074	0.224879	0.0180632	bdl		0.00478777	0.00118925	bdl		0.00373515	0.000580956	0.00399884	0.000443781	0.205443	0.00995616	2.13497
243	0.00074565	5.07712e-06	1.34377	0.00910544	11.1169	0.0832978	3.11185	0.0233504	3.3023	0.0243198	6.55107	0.0455973	21.6057	0.138721	44.5086	0.742568	458.79	18.299	128.123	2.24842	32.8501	0.39485	34.9284	0.439605	89.4172	1.53197	0.0363567	0.00163844	0.153996	0.0382027	447.923	5.36672	26.1658	2.64993	1.69984	0.27472	0.0081434	0.000718534	0.425517	0.0928482	0.026248	0.00662365	0.0302361	0.00663042	0.0136626	0.0030925	0.136939	0.00928152	1.05711
244	0.00259107	1.67372e-05	1.46062	0.00989719	11.111	0.0832531	3.3602	0.0252139	3.54645	0.0261178	0.238342	0.00163867	27.2426	0.174913	13.4529	0.195251	386.913	3.87689	188.484	3.30768	44.0924	0.512745	65.9395	0.829907	107.48	1.71892	0.0719267	0.00929016	0.0844453	0.00642298	179.832	2.51767	0.62774	0.0221586	0.00212058	0.000398023	bdl		0.0713696	0.0120283	0.00482971	0.000728682	0.0494808	0.00545315	0.00695029	0.000993822	0.150289	0.00775628	1.69256
245	0.00412301	2.66328e-05	1.59821	0.0108295	11.3749	0.0852307	3.12623	0.0234583	3.31336	0.0244012	0.251113	0.00172648	27.2939	0.175243	15.8095	0.230727	294.395	2.94986	162.519	2.85203	18.8764	0.269507	63.0468	0.7935	109.977	1.6207	0.0295549	0.00145529	0.015283	0.00202865	195.802	2.49961	0.482525	0.0170543	0.000327381	0.000155039	bdl		0.00632592	0.00137123	bdl		0.00286736	0.000492919	0.00315085	0.000319317	0.117566	0.00878459	1.49168
246	bdl		1.46996	0.00996048	11.3143	0.0847769	3.19259	0.0239562	3.38716	0.0249447	0.232394	0.00159778	27.6268	0.17738	13.7558	0.199647	342.792	3.43479	136.944	2.40321	28.8301	0.454697	64.2576	0.808739	110.497	1.6925	0.0223048	0.00124436	0.00486563	0.000498395	160.071	1.86441	0.574755	0.0218976	0.0118512	0.000938401	bdl		0.000850148	0.000498509	0.00101749	0.000202146	0.00278072	0.000329728	0.0039513	0.00051783	0.13091	0.00606062	1.62004
247	bdl		1.81045	0.0122676	11.3861	0.0853144	2.77331	0.0208101	2.94488	0.0216876	0.256997	0.00176694	27.2435	0.174919	44.8111	0.707197	242.139	2.63698	119.694	2.1005	15.0684	0.327928	59.7401	0.751882	114.192	1.72886	0.040725	0.00516584	0.0178457	0.00317716	226.471	2.46312	0.39478	0.0167922	-0.000936469	0.000260219	bdl		0.00486131	0.00119122	bdl		0.00213684	0.000288323	0.00311722	0.000620031	0.119645	0.00906197	1.4199
248	0.0132239	8.54205e-05	1.31606	0.00891763	11.2207	0.0840757	3.58517	0.026902	3.78416	0.0278684	0.534061	0.00566319	27.1783	0.174501	27.3549	0.39702	439.787	4.40669	91.9346	1.61335	44.4584	0.524648	52.3664	0.659078	105.5	1.53525	0.0147048	0.000992869	0.0156492	0.00252491	202.543	2.20287	3.54102	0.631449	0.169663	0.0118673	0.00151356	0.000247392	0.000799118	0.000479741	bdl		0.00327508	0.000655324	0.00517827	0.000643385	0.190803	0.0102396	2.23334
249	0.00626113	4.04441e-05	1.3623	0.00923099	11.1894	0.0838412	3.36072	0.0252178	3.53631	0.0260431	0.676504	0.00465117	27.2284	0.174822	25.0399	0.363421	389.478	3.90259	120.785	2.11963	37.6763	0.508979	49.8258	0.627101	100.696	1.51464	0.00812053	0.00074063	0.0159133	0.000918565	194.994	2.12077	0.771919	0.0250789	0.13537	0.00447391	0.000706259	0.000165481	0.00358458	0.00103014	bdl		0.00306124	0.000612554	0.00432987	0.000374523	0.206365	0.00881535	2.344
250	0.000874909	5.74787e-06	1.35496	0.00918126	11.2234	0.0840958	3.35891	0.0252043	3.5467	0.0261197	0.712774	0.00538103	27.1682	0.174436	29.1728	0.423406	459.548	5.50079	86.3504	1.51535	30.019	0.371864	51.0281	0.644047	101.527	1.5989	0.0190205	0.00114364	0.0140851	0.000857302	203.366	2.21183	0.82786	0.0272108	0.962018	0.0423712	0.00299082	0.000369823	0.0136653	0.00200421	bdl		0.00443728	0.000417378	0.00524425	0.000556629	0.222233	0.00784089	2.35165
261	0.00593291	3.7853e-05	1.55876	0.0101771	11.6034	0.115002	3.13917	0.0234337	3.32598	0.0237969	0.253117	0.00199586	27.514	0.193309	15.2129	0.221271	316.125	2.13236	158.305	2.82138	18.3333	0.40284	63.4407	0.798458	104.398	1.62263	0.0263174	0.00135153	0.0250705	0.00115312	188.188	2.16365	0.561331	0.0170161	0.00317516	0.00048	0.00185584	0.000278232	0.0246263	0.00268416	0.0036425	0.000382934	0.0187664	0.00414651	0.00502092	0.000931721	0.13495	0.00665091	1.5362
262	0.0166235	0.000106061	1.67028	0.0109052	11.4807	0.113786	2.98302	0.0290184	3.15168	0.0225498	0.253799	0.00200124	27.3844	0.192399	30.9715	0.521791	267.169	2.99477	135.601	2.48488	12.5077	0.213476	59.9648	0.787897	108.186	1.74807	0.0510948	0.00559248	0.0242447	0.00373736	251.689	2.89373	0.478409	0.0152415	0.00572437	0.000658416	0.000881111	0.000187419	0.00699391	0.00145002	0.000745949	0.000175663	0.0035281	0.000648487	0.00238807	0.000279411	0.102916	0.00658895	1.39333
263	0.00169892	1.08394e-05	1.53466	0.0100197	11.0646	0.109661	3.50477	0.0261629	3.71001	0.0265446	0.233476	0.00184099	26.7022	0.187605	14.899	0.216239	399.986	3.17551	179.787	3.20425	50.5644	0.667753	63.9	0.804238	111.289	1.91054	0.0307533	0.00152763	0.0643038	0.00806862	189.739	2.26179	1.51906	0.315665	0.0138445	0.00105904	0.00137413	0.000243797	0.14556	0.0275952	0.06266	0.00916194	0.154401	0.022241	0.0247193	0.002925	0.238731	0.0128405	1.95689
264	0.00631978	4.03213e-05	1.86383	0.0121688	11.081	0.109824	2.6879	0.020065	2.8601	0.0204636	0.644571	0.00564361	26.4027	0.185501	33.3717	0.484346	312.291	2.37456	113.128	2.21012	21.4152	0.31407	55.4883	0.698369	112.262	1.84282	0.0106221	0.000871921	0.00915631	0.000709158	105.624	1.23608	0.528869	0.0144109	0.0284841	0.00287146	bdl		0.0128171	0.00200373	bdl		0.00394741	0.000406143	0.00555974	0.000939117	0.199986	0.0122783	1.88937
265	0.0065831	4.20013e-05	1.4976	0.00977775	11.2259	0.111261	3.53562	0.0263932	3.75464	0.0268639	0.45416	0.00358111	26.7109	0.187667	25.8795	0.375608	426.439	2.87646	103.826	1.85045	21.9495	0.356099	53.9015	0.678398	107.516	1.58922	0.0157773	0.00106484	0.00882609	0.000692814	192.198	2.20975	0.620038	0.0154412	0.0431592	0.00247972	-0.000464706	0.000135717	0.00569344	0.00132737	bdl		0.00311971	0.000359096	0.00356491	0.000502598	0.161217	0.00945149	2.04862
266	0.0240119	0.00472309	1.55611	0.0101597	11.2838	0.111834	3.35054	0.0250116	3.52471	0.0252187	0.243471	0.0019198	27.0985	0.19039	18.8395	0.27343	372.223	2.51076	135.232	2.41017	34.6055	0.412116	60.2396	0.758168	109.588	1.74424	0.0205452	0.0012243	0.0131838	0.00276286	215.519	2.47788	0.581244	0.014383	0.0141149	0.00149272	bdl		bdl		0.000852804	0.000191099	0.00609259	0.000679282	0.00429772	0.000557598	0.166639	0.0077583	1.80984
267	0.0295683	0.0026905	1.45945	0.00952863	11.2713	0.11171	3.42885	0.0255962	3.62096	0.0259075	0.42271	0.00333312	27.1161	0.190513	24.4239	0.354481	422.471	2.8497	98.4288	1.75425	41.3709	0.471935	52.8754	0.665483	107.021	1.66661	0.0253307	0.00533583	0.0123677	0.000824133	194.051	2.23106	6.08719	0.394764	0.320692	0.0415034	bdl		0.0162008	0.00224633	0.00710583	0.00105486	0.00946918	0.000887048	0.00854016	0.00085055	0.192334	0.00866945	2.14293
268	-4.26038e-05	8.19051e-07	1.84066	0.0120175	11.1849	0.110854	3.02176	0.0225573	3.18734	0.0228049	0.248963	0.0019631	26.8418	0.188586	26.0768	0.37847	332.474	2.24264	152.241	2.71332	36.4335	0.486104	63.7959	0.802928	113.833	1.74306	0.0276137	0.00446774	0.0337664	0.00704651	148.784	2.05812	11.7908	2.38973	0.00254518	0.00044736	bdl		0.0348318	0.00332922	0.0149997	0.00180812	0.0708926	0.00951203	0.00867147	0.00122911	0.163466	0.00976864	1.8564
269	0.00673628	4.29786e-05	1.70902	0.0111581	11.1642	0.110649	3.09097	0.0230739	3.26007	0.0233253	0.24834	0.00195819	26.9309	0.189212	24.8718	0.374944	350.77	6.58084	146.186	2.6054	35.6695	0.482034	60.2942	0.758856	114.445	1.92231	0.0282503	0.00521842	0.00809929	0.00067401	185.021	2.51768	190.418	23.0242	0.185579	0.0359897	0.00356436	0.000426152	0.00592895	0.00137726	0.000944232	0.000204259	0.00642107	0.000635991	0.0044941	0.000432602	0.142342	0.00600514	1.69357
270	0.0113792	7.26014e-05	1.72295	0.011249	11.2307	0.111308	3.35849	0.025071	3.54253	0.0253463	1.07828	0.0154895	26.0214	0.182822	34.1166	0.495158	406.522	3.70913	112.552	2.10152	29.3454	0.427645	51.1536	0.643813	106.244	1.64135	0.0354355	0.00559932	0.0121052	0.000814579	195.551	2.24831	6.62306	1.89722	0.233646	0.0197344	bdl		0.0138486	0.00207449	0.00213931	0.000303047	0.00575487	0.000489494	0.00514369	0.00058329	0.173709	0.0088586	1.95879
271	0.00283154	1.80657e-05	1.56181	0.0101969	10.926	0.108288	3.50376	0.0261554	3.67294	0.0262793	0.321898	0.00253821	26.2819	0.184652	22.5788	0.327701	415.409	2.80206	112.852	2.01131	66.7241	0.658119	55.8607	0.703057	109.466	1.76911	0.0488157	0.00567096	0.0912102	0.00854541	201.607	2.39132	0.608725	0.0199797	0.0608853	0.00384157	bdl		0.229686	0.0213131	0.065446	0.00473488	0.0405005	0.00345125	0.023567	0.00168271	0.250467	0.0137801	2.1027
272	0.00053999	3.95469e-06	1.63193	0.0106547	11.109	0.110102	3.08317	0.0230157	3.26223	0.0233408	0.270933	0.00213635	27.2178	0.191228	20.3648	0.330537	375.423	2.53234	119.275	2.12578	33.8615	0.375852	57.6459	0.725524	112.49	1.85493	0.0159567	0.00107723	0.0137793	0.000875604	196.991	2.53683	42.1005	8.14825	0.0334123	0.00246102	0.00364668	0.000428642	0.0100812	0.00177854	bdl		0.00399874	0.0004094	0.0034954	0.000345762	0.15298	0.00904873	1.70541
273	0.00531165	3.38892e-05	1.62077	0.0105819	11.0417	0.109434	3.60287	0.0268953	3.78846	0.0271058	0.821718	0.00657257	26.0588	0.183085	34.8166	0.505317	445.633	3.00594	95.8192	1.70774	78.9237	0.798137	49.2805	0.620239	107.893	1.71721	0.0197511	0.00120153	0.0168453	0.000969287	209.114	2.40424	0.744116	0.018576	0.488382	0.0296296	bdl		0.00998722	0.00176612	0.00136607	0.000242848	0.0057184	0.000716757	0.00522014	0.00044512	0.223929	0.0102133	2.33505
274	0.00617566	3.94018e-05	1.6625	0.0108544	11.0653	0.109669	3.63009	0.0270984	3.81925	0.0273261	0.827153	0.00780578	25.9955	0.18264	40.8509	0.604729	422.12	2.84733	85.8402	1.52989	59.6419	0.671642	49.5842	0.655005	107.431	1.84483	0.0279818	0.00143781	0.0150538	0.000909738	222.887	2.5626	0.805186	0.0215992	0.232453	0.00791462	bdl		0.00682795	0.00145139	0.00197945	0.000291051	0.00367013	0.000675546	0.00572422	0.000762143	0.201688	0.0100653	2.46246
275	0.0139969	8.93028e-05	1.24175	0.00810731	11.1698	0.110705	3.43171	0.0256175	3.6164	0.0258748	2.17445	0.0171458	25.7825	0.181143	19.5711	0.284048	604.821	8.26987	144.958	2.58352	210.616	1.88797	32.5762	0.41	84.3635	1.37986	0.0227677	0.00128474	0.0164256	0.00394074	157.676	2.07361	0.640152	0.0184752	1.04156	0.0441046	bdl		0.0251379	0.00278839	0.00234639	0.000316201	0.00699445	0.000748808	0.00475493	0.000553785	0.199711	0.00801309	2.20259
276	0.00664683	4.24079e-05	1.46595	0.00957106	11.0342	0.109361	3.51111	0.0262103	3.69077	0.0264069	1.12502	0.00887091	26.2577	0.184482	30.7111	0.445731	468.43	3.27296	123.408	2.20698	108.929	1.10768	48.0122	0.613109	106.111	1.80063	0.0122032	0.000930521	0.010919	0.000771051	213.954	2.45989	4.58464	0.650843	0.758795	0.0597588	0.00165357	0.000267726	0.00283737	0.000934826	0.00108831	0.000215632	0.00357787	0.000483908	0.00457123	0.000393103	0.158367	0.0106072	2.08325
277	0.00728907	4.65055e-05	1.82818	0.011936	11.0624	0.10964	2.95471	0.0220568	3.12018	0.0223244	0.308639	0.00243366	26.4559	0.185875	22.3077	0.323768	356.272	2.40317	138.81	2.47394	45.1681	0.528596	60.2548	0.758359	111.783	1.82644	0.0331166	0.00156516	0.0049511	0.000512472	217.308	2.53521	0.495078	0.0157918	0.00485836	0.000765919	bdl		0.00329759	0.00100165	bdl		0.00158197	0.000253168	0.00262582	0.000295256	0.127059	0.00943327	1.66035
278	0.010444	6.66344e-05	1.77478	0.0115874	11.0391	0.109409	3.27965	0.0244824	3.46992	0.0248267	0.319238	0.00251724	26.258	0.184485	19.1459	0.277878	403.306	2.72043	119.564	2.13094	71.2986	0.765469	59.2164	0.745291	111.511	1.87597	0.0317264	0.003779	0.0496366	0.00668331	200.897	2.30977	78.1187	2.79934	0.11552	0.0320404	0.00160995	0.00026257	0.0409121	0.00954164	0.00175144	0.000272543	0.00440788	0.000837511	0.00489505	0.000627806	0.142817	0.00772282	1.82763
279	0.0051294	3.27265e-05	2.08842	0.0136352	11.0947	0.10996	2.32881	0.0186806	2.47247	0.0176902	0.245005	0.0019319	26.7934	0.188246	51.3769	0.82641	270.833	2.35947	107.055	1.90876	37.7874	0.5735	58.9871	0.742405	119.197	1.93821	0.0106264	0.000857012	0.00882604	0.000683944	99.782	1.37638	0.462446	0.0122572	0.00097823	0.000271639	bdl		0.00772399	0.00152734	bdl		0.0036868	0.000527817	0.00464861	0.000675831	0.185958	0.0107491	1.85762
280	0.00856761	5.46628e-05	1.70079	0.0111043	10.9051	0.108081	3.10241	0.0231594	3.25742	0.0233064	0.273034	0.00215291	26.5289	0.186388	25.2369	0.36628	381.367	2.57244	136.96	2.44096	31.4737	0.352346	60.5828	0.762488	115.053	1.82333	0.0494562	0.0019512	0.0122088	0.000811632	279.354	3.21182	0.568841	0.0141023	0.00695616	0.000928937	bdl		0.00645702	0.00140283	0.000780645	0.000181568	0.0032632	0.000364458	0.00280704	0.000305451	0.152932	0.00760052	1.82035
281	bdl		1.3807	0.00901452	10.9392	0.108418	3.35474	0.0250429	3.53838	0.0253166	0.836131	0.006593	26.4481	0.18582	29.9715	0.438602	395.671	2.66893	91.8422	1.63686	38.2974	0.414745	48.8623	0.614976	110.481	1.77868	0.0225138	0.00126719	0.0239826	0.00294106	195.316	2.24561	0.753754	0.0220573	0.158506	0.00557637	bdl		0.023658	0.00268215	0.0172476	0.00123353	0.0147328	0.00147024	0.0105659	0.000850446	0.218691	0.0103325	2.27046
282	0.0159663	0.000101868	1.43021	0.00933776	11.0682	0.109697	3.39714	0.0253595	3.57466	0.0255762	0.317077	0.00250019	26.9678	0.189471	19.3226	0.280442	429.138	2.89467	130.522	2.32622	48.0937	0.518097	57.9367	0.729184	111.314	1.68877	0.0280502	0.00419861	0.00889971	0.000682396	200.747	2.36781	0.674413	0.0187373	0.0522549	0.00327482	bdl		bdl		bdl		0.00177796	0.000265396	0.00444008	0.000380724	0.160787	0.00732432	2.03108
283	0.0123412	7.87389e-05	2.31807	0.0151345	11.0876	0.109889	2.4307	0.0275334	2.63013	0.0188182	0.260185	0.00205159	25.6742	0.180383	30.2136	0.473271	187.653	2.2967	104.362	1.94488	25.6664	0.322723	61.1501	0.819831	125.013	1.8822	bdl		0.0103136	0.000727626	66.7068	0.872214	0.313899	0.0103082	0.000394702	0.000169376	bdl		0.0256297	0.0027433	0.000570386	0.000151668	0.00349484	0.000642466	0.00556404	0.00057909	0.157224	0.0103932	1.61514
284	0.000729116	4.90322e-06	1.50402	0.00981965	11.196	0.110964	3.24669	0.0242364	3.42219	0.0244853	0.311421	0.0024556	27.0952	0.190366	19.6362	0.284993	417.745	2.81782	115.972	2.06691	39.4463	0.421936	57.8853	0.728538	110.599	1.62978	0.047413	0.00439376	0.149642	0.0126007	200.917	2.31	0.698442	0.016755	0.0449761	0.00342615	bdl		0.164333	0.0152195	0.117254	0.00857839	0.131792	0.00700773	0.050199	0.00371087	0.342589	0.0178549	2.00551
285	0.00417428	2.66326e-05	1.87397	0.012235	11.1773	0.110778	3.00449	0.0224283	3.17065	0.0226855	0.275216	0.00217011	26.2678	0.184553	29.9211	0.434265	357.409	2.41083	127.633	2.27474	34.0445	0.377806	58.2177	0.732721	114.793	1.75116	0.0404892	0.00383556	0.00907558	0.000683439	234.538	2.69655	0.593296	0.0201642	0.0115347	0.000932627	bdl		0.00745887	0.00147801	0.00190377	0.000278597	0.00551859	0.000465973	0.0066945	0.00102202	0.161203	0.00959777	1.91641
286	bdl		1.39138	0.0090842	10.8557	0.107592	3.41619	0.0255017	3.58767	0.0256692	1.74658	0.013772	25.4958	0.179129	26.9526	0.391182	427.215	2.8817	161.709	2.88206	39.7657	0.49272	44.7947	0.56378	102.933	1.52586	0.0281376	0.00141161	0.0173333	0.00229834	191.238	2.19872	0.518415	0.0190618	0.0719411	0.00460212	bdl		0.0190533	0.00237732	0.00620598	0.000900659	0.00581248	0.000480105	0.00734067	0.000861239	0.173812	0.0142741	1.99806
287	0.0144206	9.20056e-05	1.61628	0.0105526	11.0906	0.109919	3.30518	0.024673	3.46659	0.0248029	0.284033	0.00223964	26.5478	0.186521	24.6106	0.357191	387.587	2.61439	160.494	2.86041	33.2346	0.405847	60.1616	0.757187	112.724	1.82981	0.041168	0.00443789	0.0159461	0.00286914	276.267	3.17632	0.530422	0.0144407	0.00448093	0.000577841	bdl		0.00380154	0.00105781	bdl		0.00203459	0.000282533	0.0028931	0.000305106	0.148498	0.00777153	1.86561
288	0.0299699	0.000191213	0.774104	0.00505407	10.9436	0.108462	3.45671	0.0258042	3.61552	0.0258685	7.95834	0.0627525	20.9134	0.146934	204.914	3.05441	404.445	2.95674	72.2429	1.28755	9.74913	0.225049	12.3254	0.158642	84.1845	1.36396	0.354206	0.00908771	0.728578	0.019009	1929.82	22.1877	0.389584	0.0107393	0.158503	0.00516258	0.00178973	0.000273943	0.103009	0.016484	0.888042	0.0422034	1.43515	0.0692166	0.159214	0.00521659	0.718746	0.0327864	1.74532
289	0.00822957	5.25061e-05	0.980499	0.00640161	11.1584	0.110592	3.36609	0.0251277	3.52936	0.025252	5.01007	0.0395051	23.643	0.166112	73.0701	1.06052	409.415	2.89447	81.49	1.45236	6.8005	0.13323	22.8868	0.296215	94.56	1.43237	0.0739187	0.00535428	0.205446	0.0211995	494.162	5.68152	0.527918	0.0168225	0.114222	0.00373297	bdl		0.454261	0.0237331	0.521808	0.107347	1.07209	0.293029	0.151476	0.0290445	0.669962	0.0977795	1.82813
290	0.0107424	6.8538e-05	0.990027	0.00646382	11.0962	0.109975	3.41475	0.0254909	3.56147	0.0254818	5.00349	0.0394531	23.685	0.166407	84.3965	1.22491	404.194	2.72641	92.233	1.64382	7.82123	0.162204	23.3422	0.293782	92.6479	1.4435	0.105887	0.00636114	0.0390147	0.00314381	697.608	8.0495	0.502849	0.0162537	0.106585	0.00372105	bdl		0.0458047	0.00649929	bdl		0.00282825	0.000330668	0.00312654	0.000638113	0.133436	0.00990674	1.82549
291	0.00757954	4.83588e-05	0.871032	0.00568691	11.0476	0.109494	3.82231	0.0285333	4.03329	0.0288576	6.65069	0.0524416	21.9207	0.154012	154.666	2.62084	476.224	3.21228	88.7826	1.58233	16.2879	0.283906	16.313	0.215179	86.2398	1.33482	0.238785	0.00561944	0.0776026	0.00328658	1487.95	17.1074	0.337285	0.0124549	0.0493222	0.00296481	0.000605938	0.000149026	0.0170567	0.00219885	0.00269017	0.00032578	0.00377599	0.000672277	0.0030441	0.000306306	0.136231	0.0113079	1.80192
292	0.000321602	2.90787e-06	1.37267	0.00896207	10.4297	0.103369	3.13442	0.0233983	3.31027	0.0236845	0.251821	0.00198564	26.2761	0.184612	12.4676	0.18194	393.535	2.65451	157.854	2.81334	5.60239	0.182891	66.9096	0.842117	94.327	1.94124	0.0273389	0.00156301	0.0117979	0.000886516	201.173	2.36851	0.554006	0.0178413	0.00877055	0.00092015	bdl		0.00287349	0.00104247	bdl		0.00294209	0.000385354	0.00341001	0.000375534	0.135384	0.00699836	1.78325
293	0.00459871	2.93406e-05	1.41789	0.00925732	11.0044	0.109065	3.38443	0.0252646	3.56611	0.025515	1.42919	0.0135951	25.9349	0.182215	14.0526	0.203954	393.715	2.65573	133.133	2.37276	3.08251	0.105393	47.1863	0.593881	102.599	1.57112	0.0365742	0.00160454	0.156082	0.0105264	189.833	2.18256	0.455023	0.0120187	0.0168476	0.0016384	0.000791166	0.000172824	0.371632	0.0214388	0.215238	0.0119421	0.157066	0.011067	0.0694265	0.00355977	0.351038	0.0166276	1.77007
294	bdl		2.23783	0.0146107	11.2675	0.111673	2.72206	0.02387	2.93319	0.0209865	0.279742	0.0022058	25.567	0.17963	28.6647	0.42443	231.261	1.77821	125.882	2.26951	14.8829	0.283086	61.3789	0.822252	122.104	2.02384	0.0159682	0.00101628	0.00759126	0.000607672	118.873	1.38532	0.397624	0.0141627	0.000849099	0.000243105	bdl		0.00665769	0.0013595	bdl		0.00301389	0.000334187	0.00386004	0.000408046	0.162148	0.00886182	1.7388
295	bdl		1.5377	0.0100395	11.2054	0.111057	2.9108	0.0217289	3.09972	0.022178	0.188906	0.00148955	27.2057	0.191143	28.3788	0.411881	294.968	1.98965	127.244	2.2678	28.1672	0.365298	64.0047	0.805556	115.729	1.93454	0.0252991	0.00131626	0.018793	0.0033303	165.177	2.22887	0.511201	0.0147107	0.00344075	0.000499386	bdl		0.00673057	0.00138967	0.00213843	0.000292903	0.00493568	0.00043588	0.00537665	0.000846362	0.128202	0.00606044	1.60175
296	bdl		1.36978	0.00894318	11.3083	0.112078	3.26912	0.0244038	3.46587	0.0247978	0.207786	0.00163842	27.3964	0.192483	18.6892	0.27125	409.315	2.76096	114.33	2.03764	53.7892	0.674773	64.1359	0.807207	112.297	1.75812	0.0343889	0.00154423	0.0107207	0.000732255	170.086	1.95553	0.664209	0.0158506	0.0129457	0.00152433	0.00111068	0.000206604	0.00325189	0.000959071	bdl		0.00368682	0.000373731	0.00459003	0.000531844	0.152965	0.00687523	1.82611
297	0.0110507	7.05054e-05	1.52243	0.00993981	11.1981	0.110985	3.20478	0.0239235	3.37019	0.0241132	0.176925	0.00139507	27.1107	0.190475	19.7773	0.287041	364.724	2.46018	165.546	2.95044	106.428	0.977547	63.934	0.804666	109.749	1.85128	0.030838	0.00339172	0.0130544	0.000821817	168.115	2.29853	136.232	7.14479	0.0162293	0.0027408	bdl		0.0105291	0.00175385	0.00166748	0.000260644	0.00369697	0.000472524	0.00440489	0.000480866	0.160643	0.00810019	1.71592
298	bdl		1.34283	0.00876725	11.2135	0.111138	3.37576	0.0251999	3.56918	0.025537	0.18421	0.00145252	27.3199	0.191945	18.7984	0.272834	413.307	2.78788	141.778	2.52683	67.1029	0.620087	65.7993	0.828142	106.93	1.73238	0.0139905	0.000962051	0.0155942	0.000892425	182.093	2.11184	0.653645	0.0230577	0.00864525	0.00102213	0.000896757	0.00018472	bdl		bdl		0.00255296	0.000604365	0.00390771	0.000349967	0.141203	0.0100279	1.84191
299	0.00321436	2.05082e-05	1.78564	0.0116583	11.2825	0.111822	2.9339	0.0219014	3.10471	0.0222138	0.190301	0.00150055	26.8128	0.188382	30.1267	0.43725	294.034	2.1038	153.534	2.73636	85.1058	0.76922	58.147	0.731831	117.26	1.76507	0.0264218	0.00135131	0.00956462	0.000697219	147.871	2.01541	0.51914	0.0169298	0.0567088	0.00217993	bdl		0.00422539	0.00110424	bdl		0.00324096	0.000353576	0.00356389	0.000406224	0.156686	0.00907654	1.83743
300	bdl		1.32772	0.00866858	11.2074	0.111077	3.33593	0.0249025	3.52685	0.0252341	0.186598	0.00147135	27.4514	0.192869	13.9471	0.202424	437.093	7.72078	149.167	2.65853	76.8782	0.711259	66.92	0.842247	104.717	1.67151	0.0208927	0.00119178	0.00437239	0.000467951	155.603	2.09274	2.78312	0.248764	0.518598	0.174705	bdl		0.000502564	0.000380121	bdl		0.00333035	0.000358106	0.00414362	0.000690249	0.168085	0.00894521	1.94108
311	bdl		1.33135	0.0089891	11.2253	0.117472	3.44938	0.0273262	3.64946	0.0248893	0.194521	0.00192355	27.4338	0.190126	19.2322	0.279131	437.24	3.13305	140.021	1.85936	87.1573	0.947808	65.8534	0.828823	106.872	1.7273	0.028572	0.00141071	0.011082	0.00203197	176.552	2.2918	6.00552	0.920386	0.16163	0.0355699	bdl		0.00620353	0.00134043	0.000651976	0.000162437	0.00286115	0.000332377	0.00508653	0.000469654	0.151027	0.00595705	1.88996
312	0.00422535	2.76785e-05	1.48256	0.01001	11.279	0.118033	3.2217	0.0255225	3.43284	0.0234119	0.17983	0.00177828	27.2252	0.188679	21.5414	0.328117	553.679	6.6049	157.86	2.09625	79.7179	0.99558	64.2319	0.808415	107.68	1.73698	0.0240487	0.00129713	0.0122859	0.000800569	178.464	2.62531	95.6121	8.84866	2.02751	0.0837522	bdl		0.00574068	0.00130092	0.00174943	0.00026915	0.00595458	0.000485824	0.00513954	0.000737588	0.150918	0.00703988	1.80856
313	bdl		1.31758	0.00889614	11.1743	0.116938	3.23487	0.0299152	3.44554	0.0234985	0.780284	0.00771596	27.0103	0.18719	42.1622	0.630205	417.922	2.9533	89.7499	1.19181	50.078	0.693253	46.3037	0.582773	100.571	1.58907	0.0111302	0.000872996	0.00728941	0.000617046	168.44	2.7251	2.16913	0.218761	0.0595147	0.00352766	bdl		0.00659696	0.00140465	bdl		0.00382855	0.000391163	0.00552471	0.000426845	0.212513	0.0144585	2.2035
314	bdl		1.31877	0.00890414	11.2643	0.11788	3.3964	0.0269065	3.5705	0.0243507	0.692458	0.00684748	27.2021	0.18852	34.1074	0.509315	444.632	3.02199	95.8719	1.2731	85.773	0.933698	48.2215	0.606911	103.931	1.59617	0.0405802	0.00432437	0.0392504	0.00461108	169.88	2.38458	2.0898	0.141559	0.0632087	0.00253789	bdl		0.0741819	0.0220984	0.0200827	0.00130121	0.0464921	0.00156942	0.01547	0.00121321	0.261301	0.0116143	2.32314
315	0.0117395	7.69006e-05	1.81254	0.012238	11.3465	0.11874	2.9547	0.0234074	3.11672	0.021256	0.222555	0.00220077	26.7592	0.18545	29.3535	0.426027	303.128	2.06024	155.554	2.06563	80.5833	0.85391	61.4051	0.772837	103.773	1.59516	0.0236045	0.00129556	0.0169773	0.00289411	151.209	2.07859	32.8092	3.00799	0.00792897	0.000778543	0.00149346	0.000249539	0.0236199	0.00267484	0.00175058	0.000271798	0.00596789	0.000587406	0.00533395	0.000585205	0.179052	0.00830472	1.90008
316	0.00741808	4.85928e-05	1.43524	0.00969053	11.1685	0.116877	3.30729	0.0262006	3.46707	0.0236453	0.214733	0.00212342	27.3111	0.189275	18.4629	0.267965	406.55	2.76316	131.078	1.74062	49.1646	0.557378	62.9036	0.791697	106.398	1.70073	0.0287635	0.00376455	0.0145991	0.000892655	180.577	2.42835	0.698622	0.0165935	0.0172226	0.0015891	bdl		0.00820242	0.0015881	0.00995445	0.00104185	0.0158751	0.0012441	0.00964648	0.0010501	0.175836	0.0148402	1.88642
317	0.00765256	5.01288e-05	1.41278	0.00953889	11.4383	0.1197	3.37242	0.0267166	3.55647	0.0242551	0.182296	0.00180266	27.7344	0.192209	18.2816	0.265334	407.586	2.7702	165.031	2.19148	65.4141	0.757175	66.6138	0.838394	102.068	1.52711	0.0148018	0.00101026	0.00946545	0.000703966	182.892	2.3741	0.680567	0.0142996	0.000775692	0.000240505	bdl		0.00416056	0.0011133	0.00203502	0.000292137	0.009988	0.00106033	0.00748253	0.000658568	0.170465	0.00776779	1.96697
318	0.00552389	3.61847e-05	1.34649	0.0090913	11.2949	0.1182	3.35223	0.0265566	3.53005	0.0240749	0.199265	0.00197047	27.5937	0.191234	19.0265	0.276145	415.946	2.82702	112.192	1.48981	47.2593	0.570269	66.5871	0.838058	108.621	1.63886	0.02161	0.00124302	0.0135555	0.000854504	183.743	2.57148	0.712526	0.0113198	0.0205583	0.00133023	bdl		0.00405407	0.00110946	bdl		0.00282627	0.000338287	0.00442338	0.000503134	0.163957	0.00738081	2.07622
319	bdl		1.17928	0.00796231	11.2341	0.117563	3.39382	0.0268861	3.57518	0.0243827	1.69022	0.016714	26.3679	0.182738	40.894	0.593523	372.834	2.534	76.0169	1.00944	81.5746	0.898733	37.3902	0.470588	78.6603	1.29007	0.0418874	0.00402543	0.048054	0.00481466	191.227	2.48229	5.09036	0.870355	0.0434025	0.00277307	0.00204642	0.000300363	0.0905788	0.0141207	0.0191413	0.00119899	0.0112237	0.000950245	0.0117174	0.00095237	0.236554	0.00976412	2.39385
320	0.00301992	1.97822e-05	1.36692	0.00922925	11.205	0.117259	3.54533	0.0280863	3.7331	0.0254597	0.182636	0.00180603	27.3348	0.189439	19.5732	0.284079	513.704	5.00236	163.783	2.17491	78.7544	0.825041	65.5914	0.825526	105.736	1.70326	0.0337603	0.00157493	0.0283923	0.00306813	201.619	2.68309	6.7036	0.579272	1.73959	0.145564	0.000991666	0.000199948	0.0166711	0.00225186	0.0191388	0.00253992	0.0328937	0.00210758	0.00992267	0.000981347	0.207569	0.0140258	2.16811
321	bdl		1.47481	0.00995771	11.2916	0.118166	3.23757	0.0256482	3.43855	0.0234509	0.185426	0.00183362	27.2534	0.188875	15.4326	0.223985	375.93	3.7392	165.453	2.19708	98.2473	1.0396	64.1471	0.807348	108.997	1.76938	0.0169486	0.00109644	0.0177034	0.00222316	155.646	2.33322	8.03711	2.11616	0.122985	0.00346802	bdl		0.0158256	0.0022027	0.0154408	0.00141168	0.0127635	0.00102482	0.00620208	0.000935501	0.15545	0.0075952	1.84467
322	0.000424676	3.34637e-06	1.37588	0.00928976	11.4198	0.119507	3.46562	0.0274549	3.63808	0.0248116	0.260435	0.00257536	27.5778	0.191123	22.4436	0.334373	428.108	3.119	112.223	1.49023	65.2054	0.837861	61.4069	0.77286	106.215	1.66862	0.0254803	0.0013512	0.012467	0.000815167	175.012	2.27181	23.8705	2.92519	0.0375351	0.00289497	bdl		0.00164336	0.000703139	0.000620735	0.000161746	0.00295617	0.000344608	0.00400661	0.000495465	0.147333	0.00699867	2.01093
323	bdl		1.56049	0.0105362	11.381	0.119101	3.72222	0.0294877	3.89854	0.026588	0.30943	0.00305985	26.9105	0.186499	30.6284	0.444532	452.46	3.07519	111.484	1.48042	70.2988	0.737289	58.38	0.734764	107.824	1.5894	0.0184149	0.00480844	0.0194489	0.00102325	205.969	2.67366	11.4869	1.8637	0.0862012	0.00411988	0.00244622	0.000330321	0.0257838	0.0027916	0.00374768	0.000398856	0.0107865	0.00168401	0.00697842	0.000882407	0.192112	0.00800263	2.23948
324	bdl		1.62828	0.0109939	11.2525	0.117756	3.16702	0.0250894	3.35727	0.0228965	0.163802	0.00161978	26.8538	0.186106	24.1602	0.395202	320.982	2.18159	170.908	2.26952	95.2541	1.02957	57.6998	0.726203	110.08	1.73112	0.0204567	0.00121074	0.00991147	0.000729551	178.328	2.44951	33.4296	3.95434	0.0045386	0.000591086	bdl		0.0154286	0.0021763	0.00122789	0.000229379	0.00575678	0.000847651	0.00501115	0.000629546	0.142791	0.00659664	1.65333
325	bdl		1.69266	0.0114286	11.1497	0.11668	3.39996	0.0269347	3.56007	0.0242797	0.229933	0.00227373	26.3313	0.182484	24.0914	0.349655	371.25	2.52324	165.806	2.20176	107.738	1.10352	63.6927	0.81344	115.139	1.85202	0.010921	0.000874489	0.00750127	0.000633453	169.061	2.34438	0.557693	0.0128614	0.00941422	0.00121652	0.00214187	0.000308501	0.0116217	0.00188887	bdl		0.00287335	0.00039571	0.0042259	0.000672056	0.159356	0.00991164	1.88557
326	bdl		1.58145	0.0106777	11.2081	0.117292	3.19336	0.025298	3.39429	0.023149	0.235873	0.00233247	27.0239	0.187285	30.0231	0.435747	379.212	2.57735	119.286	1.58402	29.0799	0.428	60.9912	0.767628	115.274	1.87437	0.0226515	0.00127774	0.0109863	0.00076914	181.647	2.35794	1.75109	0.306209	0.0261686	0.00186868	bdl		0.0088723	0.00164804	bdl		0.00191909	0.000279179	0.0028465	0.000308618	0.147974	0.0102674	1.75467
327	0.00117686	7.7091e-06	1.44274	0.00974121	11.1839	0.117038	3.46978	0.0274878	3.64027	0.0248266	0.576765	0.00570344	26.7498	0.185385	45.4895	0.66022	389.654	2.64832	104.302	1.38504	70.3098	0.738533	51.0311	0.642272	109.309	1.81585	0.0290242	0.00145625	0.0304278	0.00292375	199.386	2.58821	0.719387	0.0151641	0.1087	0.00464132	bdl		0.0249109	0.00276793	0.00092363	0.000198575	0.00320301	0.00036079	0.00566467	0.000536934	0.176823	0.0100849	2.12879
328	0.0076557	5.01493e-05	1.42639	0.00963081	11.2982	0.118234	3.29362	0.0260923	3.47213	0.0236799	0.210599	0.00208254	27.2651	0.188956	22.5864	0.327811	546.056	8.56165	155.485	2.11213	106.116	1.12589	63.9977	0.805468	112.334	1.75786	0.0185417	0.0011444	0.0140324	0.000868085	181.426	2.35507	3.92661	0.35455	1.45231	0.0751662	bdl		0.00746042	0.00150305	0.00242726	0.000321748	0.00581213	0.000792933	0.00343876	0.000337777	0.134409	0.00970928	1.79848
329	0.00317377	2.07901e-05	1.4035	0.00947627	11.1412	0.116591	3.53726	0.0280225	3.71148	0.0253122	0.332738	0.00329033	26.8036	0.185758	47.4628	0.68886	715.952	7.09145	113.464	1.50671	85.0543	0.970083	55.805	0.702355	112.338	1.9519	0.0228815	0.00128316	0.0150497	0.000903474	198.121	2.57347	0.703779	0.0133271	3.27984	0.0959622	bdl		0.0096446	0.00171655	0.0020358	0.000295571	0.00560651	0.00091049	0.00480952	0.000789125	0.171137	0.00923126	2.05056
330	bdl		2.52897	0.0170753	11.3156	0.118417	2.76529	0.0246366	2.94895	0.0201118	0.295207	0.0029192	24.8213	0.172019	27.3653	0.403836	179.014	1.81085	133.284	1.7729	73.737	1.02801	64.5846	0.814435	131.33	2.24257	0.00674861	0.000678425	0.00487859	0.000505401	61.7452	0.841578	25.7285	2.49733	0.00451741	0.000585315	bdl		0.0123163	0.00193007	0.000560748	0.000153764	0.00576222	0.000516553	0.00534128	0.000535451	0.169489	0.00782656	1.80497
331	bdl		1.67872	0.0113345	11.2152	0.117366	3.35214	0.0265559	3.54041	0.0241456	0.262659	0.00259735	26.5194	0.183788	24.0659	0.359247	465.419	16.3396	164.054	2.17851	81.6217	0.921101	61.3788	0.772506	112.374	1.85883	0.0312385	0.00150964	0.010864	0.000760933	171.483	2.53055	0.875588	0.0534624	0.338111	0.0744383	0.000524425	0.000142505	0.00416214	0.00112188	0.000693144	0.000171314	0.00307194	0.000351919	0.00366548	0.000485778	0.166857	0.00791388	1.859
332	0.01174	7.6904e-05	1.7507	0.0118205	11.4107	0.119412	3.34107	0.0264682	3.53073	0.0240795	0.259661	0.00278684	26.5149	0.183757	19.7178	0.290877	364.053	2.47432	159.84	2.12255	64.7436	0.744138	64.9729	0.817741	111.954	1.68496	0.0178235	0.00110991	0.00415385	0.000462073	173.699	2.37276	0.566382	0.0114072	0.00369827	0.000685404	bdl		0.00923669	0.00165639	bdl		0.00211987	0.000289032	0.00311856	0.000318378	0.148468	0.0106596	1.72807
333	0.00216007	1.41497e-05	1.51368	0.0102202	11.4397	0.119715	3.49876	0.0277174	3.69826	0.0252221	1.03597	0.0102444	26.4792	0.18351	27.3265	0.396609	450.403	3.06121	156.971	2.08445	125.75	1.43631	49.4678	0.66143	101.307	1.49164	0.00963415	0.000804266	0.00909695	0.000685584	187.868	2.4387	0.725216	0.012606	0.0589953	0.00310906	bdl		0.00448115	0.00114844	bdl		0.00231725	0.00030122	0.00428755	0.000626516	0.166299	0.00929332	1.89235
334	bdl		1.6608	0.0112135	11.2234	0.117452	3.22328	0.025535	3.40531	0.0232242	0.469186	0.00463962	26.4852	0.183551	23.039	0.334753	401.666	2.72996	119.102	1.58158	73.9025	0.907159	56.8857	0.715957	110.658	1.85257	0.020888	0.00121155	0.010997	0.000761441	172.425	2.54333	8.76237	1.41462	0.0410571	0.00253228	bdl		0.014526	0.00208895	0.000823438	0.000185719	0.00240127	0.000309059	0.0038829	0.000357222	0.126472	0.00847364	1.69137
335	0.000923449	6.12151e-06	1.59913	0.0107971	11.2258	0.117477	3.37599	0.0267448	3.53681	0.024121	0.58114	0.0057467	26.6696	0.184829	48.5097	0.704055	429.98	2.9224	118.694	1.57615	70.3393	0.73747	50.802	0.639389	108.53	1.6893	0.0219172	0.00124081	0.0140549	0.000862637	194.073	2.62476	0.660681	0.0283937	0.040935	0.00306814	0.0038164	0.00043158	0.00502722	0.00122431	bdl		0.00405483	0.000401887	0.00372832	0.000629851	0.165648	0.00728401	1.94822
336	-1.89211e-05	5.22996e-07	1.53227	0.0103457	11.2566	0.117799	3.36907	0.02669	3.55683	0.0242575	0.279961	0.002937	26.9292	0.186628	34.506	0.501451	454.788	5.54237	94.217	1.25113	89.69	0.950722	55.9977	0.70478	112.969	1.91273	0.0324226	0.00401003	0.0106914	0.000748585	201.369	2.61394	0.706658	0.0151248	1.31434	0.107053	bdl		0.0111005	0.00181998	bdl		0.00403914	0.000400675	0.00450994	0.000592162	0.170348	0.00895305	2.0287
337	0.0065301	4.2776e-05	1.70432	0.0115074	11.3754	0.119043	3.45921	0.0274041	3.63741	0.0248071	0.903934	0.0132662	26.2268	0.18176	41.0625	0.595968	419.273	2.84963	112.236	1.56253	73.2259	0.832229	50.4803	0.635339	108.573	1.62087	0.0203548	0.0011885	0.0114293	0.000772305	194.838	2.52917	0.799987	0.0179907	0.12123	0.00457898	0.00191008	0.000284323	0.0107566	0.00178585	0.000632314	0.000161763	0.00365878	0.000649035	0.00416454	0.000663022	0.182929	0.00836442	2.14341
338	0.00351917	2.30526e-05	2.55893	0.0172775	11.419	0.119499	2.84265	0.0225196	3.02165	0.0206076	0.290057	0.00286827	24.8009	0.171878	26.9441	0.391058	205.878	2.45309	136.384	1.81107	109.791	1.24998	64.1099	0.806879	136.36	2.26448	0.00183209	0.000347997	0.00850876	0.000664636	67.496	0.876157	0.368734	0.0122466	0.133258	0.0105147	0.000419751	0.000125572	0.00437964	0.00113893	0.000695979	0.000169904	0.00359048	0.000552927	0.00438204	0.000397563	0.170742	0.00842822	1.73836
339	0.0134087	0.00159144	1.56042	0.0105358	11.2554	0.117786	3.39397	0.0268873	3.58379	0.0244414	0.253267	0.00250447	26.8794	0.186283	27.3406	0.396813	436.904	2.96946	120.884	1.60524	104.351	1.10596	61.7179	0.776774	112.916	1.7819	0.0245398	0.00131472	0.102512	0.0135239	190.164	2.46849	56.0491	3.36682	0.338853	0.0299333	0.00279559	0.000355969	0.294825	0.0626151	0.00272852	0.00058971	0.0142809	0.00121313	0.00560697	0.00084779	0.175479	0.00906301	1.89703
340	0.000700687	4.88447e-06	1.41127	0.00952866	11.3843	0.119135	3.62885	0.028748	3.8186	0.0260428	0.618612	0.00660064	26.9631	0.186863	40.7459	0.591374	453.614	3.08303	109.932	1.4598	125.048	1.5104	51.1655	0.643963	108.249	1.57526	0.0297309	0.00145432	0.0458479	0.00681819	213.47	2.77102	24.4869	1.52179	0.280983	0.0423153	bdl		0.0452195	0.00845596	bdl		0.00458079	0.00042577	0.00530625	0.000620546	0.185743	0.00888711	2.22697
341	0.00466399	3.05519e-05	1.38847	0.00937477	11.2171	0.117386	3.37497	0.0267367	3.56293	0.0242991	0.659965	0.00652617	26.9189	0.186557	29.7486	0.431763	785.571	13.7525	141.027	1.87272	117.974	1.45982	51.7192	0.650932	109.529	1.75958	0.0185174	0.00113726	0.0366086	0.0050166	166.464	2.42315	0.695538	0.014522	8.48101	0.310463	bdl		0.0152457	0.00214133	0.00254066	0.000327631	0.00599994	0.00049098	0.00474701	0.000440411	0.166471	0.0110677	1.82787
342	0.0107429	7.03723e-05	1.42628	0.00963003	11.2004	0.117211	3.35328	0.0265649	3.54444	0.0241731	0.738871	0.00922389	26.8455	0.186048	26.5941	0.386028	419.927	2.85407	115.432	1.581	48.9837	0.706827	51.5458	0.648749	106.725	1.65168	0.0200526	0.00117959	0.00853763	0.000665516	179.163	2.34594	0.647229	0.0113949	0.0749172	0.00341653	bdl		bdl		0.00054303	0.000149969	0.00127867	0.000223968	0.00365877	0.00034495	0.156616	0.0112519	1.7936
343	0.0232347	0.00319232	0.875495	0.00591122	11.0662	0.115807	3.53332	0.0279912	3.71841	0.0253595	6.66969	0.0659544	22.2767	0.154385	55.4994	0.805501	426.934	2.9017	82.8845	1.10064	61.6616	0.654633	17.0423	0.214493	88.1149	1.37689	0.123391	0.00596583	0.0603345	0.00696935	1079.72	14.7881	0.411558	0.0108238	0.097472	0.00426393	bdl		0.0474746	0.014214	0.00130961	0.000235355	0.00201304	0.000283766	0.00405639	0.000585471	0.154497	0.00893299	1.9422
344	0.000951518	6.27109e-06	1.31216	0.00885953	11.2376	0.1176	3.3811	0.0267853	3.57994	0.0244151	1.30414	0.0128962	26.414	0.183058	37.1524	0.539218	1325.69	19.2723	193.887	2.57467	147.517	1.62639	42.6013	0.536175	107.613	1.78449	0.00881449	0.000772115	0.0304499	0.00300672	143.778	2.01003	0.719205	0.0157382	11.5631	0.577955	bdl		0.0339506	0.00401407	0.00816541	0.000592697	0.0197459	0.00121755	0.00784746	0.000745785	0.175537	0.012509	1.78571
345	bdl		0.963474	0.00650525	11.1726	0.11692	3.33911	0.0264527	3.51183	0.0239507	5.12771	0.0507062	23.6928	0.164199	30.9318	0.448935	399.033	2.71207	83.1841	1.10462	42.4253	0.552173	22.1948	0.279341	86.5516	1.43899	0.0202444	0.00118902	0.0096446	0.000710516	281.912	3.65946	1.97494	0.198907	0.0905235	0.00305756	bdl		0.00989787	0.00171896	bdl		0.00310233	0.000350751	0.00472758	0.000393946	0.117884	0.00740612	1.54023
*BIR-1G is used as the primary reference material
[truncated: 29 more columns]

## Sheet: S3f_CW021
Table S3f. LASS-ICP-MS trace element analyses of garnet from sample CW021 (Session 2).
	Major elements (wt %)														Trace elements (μg/g)
Analyses	Na	2s	Mg*	2s	Al	2s	Ca (43)	2s	Ca (44)	2s	Mn*	2s	Fe*	2s	Sc*	2s	Ti*	2s	V	2s	Cr*	2s	Co*	2s	Zn*	2s	Rb	2s	Sr	2s	Y	2s	Zr*	2s	Nb	2s	Cs	2s	Ba	2s	La	2s	Ce	2s	Pr	2s	Nd	2s	Sm
134	0.0797689	0.00382094	1.61903	0.0121243	15.6873	0.0807105	4.30141	0.0221306	4.1121	0.0211566	1.14395	0.00749468	23.8517	0.156016	132.823	1.98808	412.723	8.04476	60.261	0.334063	25.6185	0.440376	89.5313	1.14838	143.462	1.69254	0.0282012	0.00552416	0.494262	0.0906817	165.911	1.05155	65.9173	2.76372	0.104327	0.00842262	0.00059353	0.000119509	0.0166119	0.00194966	0.0051724	0.000392034	0.015491	0.000695617	0.00295513	0.000269561	0.039621	0.00609987	0.215929
135	0.120214	0.00741337	1.63308	0.0122295	15.8535	0.0815656	4.34255	0.0223422	4.12434	0.0212196	1.44842	0.00948941	23.7536	0.155374	138.611	2.25123	2511.47	488.713	65.0556	0.478856	26.9773	0.438127	76.498	0.981206	140.871	1.48128	0.0531621	0.00523587	0.329446	0.0241684	213.785	1.07095	64.4469	3.63863	2.72317	0.578851	0.00534744	0.00035597	0.0640713	0.00877971	0.0058926	0.00102806	0.0197263	0.0026664	0.00217973	0.000229438	0.0304659	0.0042588	0.239101
136	0.520031	0.0560495	2.16414	0.0209604	14.2227	0.192639	4.51123	0.0276778	4.29269	0.0316669	0.876904	0.0120309	21.1383	0.20222	119.273	1.78527	775.796	44.806	77.5968	2.12701	24.8709	0.462624	90.0529	1.32248	174.278	1.86279	0.0267979	0.00114166	1.16991	0.11252	111.593	2.65086	124.248	6.34395	0.585975	0.0482805	0.00247998	0.000236053	0.397307	0.031467	0.00303342	0.000290027	0.00969996	0.00103861	0.00225485	0.000227412	0.0212363	0.00297834	0.207094
137	0.229574	0.0189672	1.64916	0.0136467	15.3011	0.0860627	4.28262	0.0318449	4.12019	0.0211982	1.34929	0.00883995	23.2017	0.151764	130.487	2.06958	717.699	37.7627	63.6741	1.00134	15.8955	0.300258	75.7847	1.05032	137.575	2.08144	0.0477622	0.00156093	0.435311	0.0300701	184.097	1.72129	48.7677	3.15817	0.491447	0.0387374	-0.00118322	0.0001665	0.0994245	0.00471975	0.00183257	0.000230254	0.00381054	0.000339931	0.00143862	0.000185464	0.0210645	0.00276851	0.166301
138	0.578167	0.014048	1.79124	0.0134139	14.2044	0.0730812	4.5061	0.0259006	4.33628	0.02231	1.03573	0.00678568	21.6836	0.141834	130.134	1.94783	312.165	10.2763	81.8819	0.803984	19.1289	0.339577	79.6696	1.02189	145.406	1.37531	0.244578	0.0757376	0.963546	0.0235871	146.7	1.04488	34.8196	1.83691	0.0668327	0.00933756	0.0415309	0.000953635	0.608777	0.181054	0.00245695	0.000254887	0.00481647	0.000557829	0.00178837	0.000197639	0.0224748	0.00180402	0.168512
139	0.0826395	0.0152628	2.21828	0.0166118	15.9154	0.0818841	4.39245	0.022599	4.19541	0.0215852	0.554905	0.00363551	23.1451	0.151394	124.591	1.86487	576.467	35.28	68.7343	0.778737	29.7629	0.506964	106.244	1.36274	156.599	1.48119	0.119463	0.0072336	0.175957	0.0271946	65.8923	0.544716	160.58	11.6612	0.349258	0.0372235	0.0792786	0.00226153	0.344185	0.0142547	0.00214222	0.000249182	0.00732811	0.000838245	0.00244703	0.000242026	0.051227	0.0055884	0.415594
140	0.00233542	1.20156e-05	2.82182	0.0211315	16.0626	0.0826414	3.98508	0.0205031	3.86193	0.0198695	0.630942	0.00413366	22.1827	0.145099	108.011	1.61669	323.678	22.8122	52.9545	0.265273	25.2695	0.399424	107.95	1.40436	196.758	2.84787	11.065	0.683755	0.0520429	0.00418307	56.9022	0.285049	66.8886	4.35845	0.230427	0.0307398	0.902205	0.0568166	54.4286	3.09661	0.00237778	0.000267635	0.00546944	0.00076918	0.00330647	0.000286732	0.0578314	0.00352532	0.520647
141	0.00169322	8.71154e-06	2.46438	0.0184548	16.0173	0.0824082	4.11767	0.0211853	3.99435	0.0205508	0.660924	0.00433009	22.7212	0.148621	112.275	1.68053	301.084	12.4812	52.6965	0.26398	24.5823	0.499058	101.726	1.30479	168.048	1.92991	0.00103392	0.000229882	0.0129209	0.000755334	56.7851	0.284462	45.9666	2.49595	0.129333	0.0174225	-0.000310487	8.5928e-05	0.00311582	0.000840423	-0.000364595	0.000103581	0.00227988	0.000265253	0.00133586	0.000180066	0.0568701	0.0044903	0.502389
142	0.498933	0.0146387	1.94316	0.0145516	14.3014	0.0735802	4.12782	0.0349416	3.98919	0.0205242	1.50911	0.00988708	21.4637	0.140396	113.393	1.83648	340.569	5.87058	72.2497	0.826794	14.4534	0.258953	76.1674	1.00097	172.386	2.50617	0.0583247	0.00168318	0.94576	0.0249171	166.276	0.862346	12.4976	1.01502	0.087081	0.00823627	0.0270843	0.00452704	0.222765	0.0212993	0.00341522	0.000307151	0.00775153	0.000763466	0.00227399	0.000268822	0.0371386	0.00287525	0.241715
143	0.0669236	0.00376573	1.83466	0.0137391	15.867	0.0816353	4.2663	0.0219499	4.0656	0.0209173	1.35903	0.00890382	23.6114	0.154444	122.907	1.83966	1784.52	167.954	59.5507	0.313875	21.0539	0.367029	86.8967	1.11459	158.948	1.7264	0.202788	0.00892676	0.463418	0.0387631	190.392	0.953759	63.6678	5.9277	1.63297	0.166719	0.0726443	0.00542238	0.877601	0.083465	0.00303698	0.0002992	0.0152567	0.00148019	0.0021312	0.000227412	0.0260214	0.00336723	0.173779
144	0.16433	0.00551769	2.13245	0.0159691	15.7638	0.0811041	4.26346	0.0219353	4.07094	0.0209448	1.34472	0.00881002	22.6215	0.147969	111.73	1.67236	1532.44	101.486	62.858	0.3827	21.1851	0.370498	86.7383	1.11255	177.472	1.95782	0.0440949	0.00149163	0.796665	0.103192	171.259	0.857914	29.692	0.940461	1.36244	0.0845017	0.00820768	0.000437888	0.34699	0.0621533	0.0059867	0.000416027	0.0212602	0.00374842	0.00493717	0.000342708	0.0485538	0.00560384	0.229849
145	0.0170633	0.0025121	1.62575	0.0121746	16.1103	0.0828867	4.23541	0.021791	4.06295	0.0209037	1.01493	0.0066494	24.457	0.159975	138.95	2.0798	1527.52	51.1144	58.0327	0.290712	30.1462	0.603208	104.024	1.3662	131.024	1.64892	0.0197806	0.00101291	0.0586276	0.00914864	141.171	1.03208	99.4497	4.17543	1.51327	0.0649577	-0.000887011	0.000146117	0.00666784	0.00123789	0.0026763	0.000282753	0.00916877	0.00176352	0.00221191	0.000233079	0.0264448	0.00348597	0.225324
146	0.56657	0.0207854	1.83218	0.0137205	14.2069	0.0730939	4.47118	0.023004	4.29347	0.0220897	0.858456	0.00562424	21.7822	0.142479	131.414	1.967	4266.87	88.8201	87.105	1.09116	29.8447	0.517421	91.079	1.16823	146.601	1.94504	0.019412	0.000963025	0.94267	0.0317317	123.3	1.23476	39.4115	1.76091	4.35786	0.0688891	-0.000470149	0.000102113	0.0556638	0.00462886	0.00306203	0.0003817	0.00613372	0.000651589	0.00215675	0.000220985	0.0263596	0.00261138	0.214795
147	0.219093	0.00338787	1.9462	0.0145744	15.6748	0.0806462	4.25051	0.0218687	4.0598	0.0208875	1.54411	0.0101164	23.0407	0.150711	122.414	1.89026	552.924	25.7465	65.7754	0.329499	22.8456	0.479927	81.7605	1.04871	162.862	1.54043	0.048486	0.00474227	0.419462	0.0161578	190.117	1.25914	108.62	8.15904	0.279319	0.0223659	-0.000983096	0.000147886	0.0684009	0.00542797	0.00134131	0.00019251	0.00672924	0.000985622	0.00193401	0.00020953	0.0283115	0.0022733	0.293136
148	0.66962	0.00676212	1.7983	0.0134667	13.9539	0.0717921	4.60279	0.0236811	4.40745	0.0226761	2.35241	0.015412	19.8229	0.159675	91.0321	1.38319	512.523	16.5398	97.1797	0.486817	20.803	0.361283	58.765	0.785609	157.632	1.62729	4.46771	0.286106	8.56196	0.24594	301.409	1.73845	86.9443	4.03995	0.121894	0.0172922	0.298798	0.0174467	60.2272	4.13657	0.0164117	0.00278089	0.0498366	0.00821092	0.00836852	0.0012916	0.0627348	0.00511561	0.330998
149	0.208249	0.00447098	2.00155	0.0149888	15.221	0.0783112	4.42794	0.0451991	4.23054	0.0361227	2.51955	0.016507	21.4347	0.140206	87.8083	1.31431	631.329	14.7437	72.9102	0.36524	16.102	0.33062	74.3707	0.953921	168.115	2.00894	0.321575	0.0150994	8.45008	1.17022	319.552	2.69133	77.4269	2.67362	0.200127	0.0149031	0.0285898	0.0023452	4.35505	0.446342	0.210073	0.035784	0.610061	0.101566	0.0957251	0.0155852	0.495938	0.0677763	0.583717
150	0.502191	0.0166044	2.10288	0.0157476	14.3435	0.0737967	4.43707	0.0228286	4.32373	0.0222454	0.476197	0.00311984	21.5856	0.141193	115.847	1.81058	1902.15	166.792	90.6405	0.480368	31.6756	0.514441	102.465	1.33507	156.934	1.68498	0.0404929	0.00138399	2.27984	0.217481	56.4922	0.672319	20.3699	1.3402	1.9209	0.179498	0.00415948	0.00030198	0.312879	0.0179216	0.00709229	0.00103574	0.0179843	0.00169134	0.00340102	0.000275703	0.0368628	0.00473352	0.246978
161	0.125471	0.00751314	1.71048	0.0128091	15.642	0.0804774	4.27238	0.0219812	4.1352	0.0212754	0.793817	0.00520075	23.6874	0.227315	124.571	1.86457	517.284	12.8133	66.0328	0.405349	29.8718	0.46164	112.57	1.44388	122.735	1.70456	0.0158771	0.000884462	0.339327	0.0296924	110.532	0.903297	75.9801	8.24241	0.228354	0.0142868	0.0008783	0.000142095	0.0243657	0.00404045	0.00810658	0.00165563	0.016445	0.00267081	0.00266244	0.000249836	0.035633	0.0038827	0.232924
162	0.173478	0.00775679	1.62645	0.0121799	15.4845	0.0796673	3.96675	0.0204087	3.84279	0.019771	2.02789	0.0132858	23.0166	0.220878	130.969	1.97502	2067.62	146.31	63.0321	0.404512	25.764	0.603338	69.2452	0.888178	154.089	2.1524	0.0676128	0.0077996	1.78052	0.218643	202.491	1.01437	50.4732	5.01422	2.03434	0.162292	0.0283566	0.00346038	0.0796075	0.00440595	0.0279405	0.00455982	0.0820283	0.0130695	0.015991	0.00256004	0.113139	0.0146383	0.422182
163	0.0739076	0.00546097	1.92095	0.0143852	15.7846	0.0812109	4.26825	0.02196	4.1355	0.021277	0.9255	0.00606348	23.2341	0.222965	113.056	1.73267	298.408	3.73197	58.1951	0.447628	17.9278	0.343579	101.392	1.3005	152.076	2.11715	0.14653	0.0117125	0.119474	0.00873784	136.151	0.801923	14.5805	4.42847	0.00186846	0.00031086	0.00970842	0.000482099	0.537309	0.0342683	0.000570684	0.000129963	0.00197041	0.000247127	0.000801254	0.000139464	0.029487	0.00452991	0.225774
164	0.0901513	0.0111284	1.69777	0.0127139	15.5581	0.0800459	4.19798	0.0288823	4.09477	0.0210674	0.701272	0.00459444	23.7773	0.228178	126.171	1.9624	1671.99	179.623	66.6415	0.526735	31.7069	0.541636	114.573	1.49435	129.981	1.88034	0.0157877	0.000898734	0.191792	0.0197228	99.0246	1.03503	99.7492	5.61073	1.7098	0.243317	-0.00147957	0.000188044	0.0135476	0.00175071	0.00281403	0.000289076	0.00514556	0.000969397	0.00169696	0.000203281	0.0320451	0.00284222	0.296259
165	0.0575288	0.00474886	1.52907	0.0114506	15.8007	0.0812941	3.83294	0.0197203	3.69442	0.0190076	2.24837	0.0147304	23.56	0.226092	122.567	1.83457	6468.95	596.664	62.5628	0.49073	30.7343	0.539401	68.4999	0.878618	140.312	2.04762	0.0429352	0.00409404	0.151906	0.0103342	207.199	1.03795	178.224	18.0507	6.76413	0.60515	-0.000565273	0.000117954	0.104514	0.0147796	0.00821849	0.000501948	0.0166312	0.0026134	0.00304961	0.000775182	0.0608128	0.00543997	0.479268
166	0.00692782	3.56434e-05	1.56318	0.011706	15.8316	0.0814528	3.9183	0.0201595	3.77538	0.0194242	2.38773	0.016398	23.4331	0.224875	98.0736	1.46796	624.252	12.8259	65.3195	0.359539	16.478	0.344488	67.7796	0.869379	143.374	2.12826	0.0520223	0.00447191	0.325426	0.0487621	234.277	1.1736	76.4632	6.1177	0.195087	0.0182127	0.000947047	0.000152545	0.0190707	0.00210468	0.0709766	0.00809548	0.175253	0.0190991	0.0258154	0.00274037	0.156359	0.0130666	0.541638
167	0.0406035	0.00347787	1.63781	0.0122649	15.7531	0.0810491	4.21067	0.0216637	4.09841	0.0210861	1.40599	0.00921146	23.6564	0.227018	125.522	1.8788	414.213	6.93207	59.0492	0.295804	18.8334	0.350406	78.3159	1.00452	139.583	1.8251	0.131786	0.00618715	0.120384	0.00689226	218.288	1.0935	1.76544	0.23238	0.0437901	0.00150099	0.0137529	0.000569837	0.28078	0.0147855	0.000116768	5.82786e-05	0.00142763	0.000208464	0.00127188	0.00017432	0.0239214	0.00319734	0.212021
168	0.0785641	0.00496727	1.88285	0.0140999	15.6274	0.0804023	4.2117	0.021669	4.07597	0.0209707	0.607255	0.00397848	23.6429	0.226888	122.922	1.83989	3426.14	282.601	70.5667	0.442227	27.5375	0.435115	113.091	1.45056	145.973	1.87724	0.011121	0.000756485	0.178661	0.00640325	81.4403	0.407971	138.944	12.3167	3.55036	0.272866	-0.000587067	0.000118897	0.0244889	0.00506563	0.000992408	0.000172199	0.00581893	0.0010851	0.00151019	0.000192533	0.0350729	0.00345105	0.341761
169	0.04401	0.00616972	1.75523	0.0131442	15.6408	0.0804712	3.90745	0.0294103	3.7755	0.0194248	1.72884	0.0113266	23.447	0.225008	121.986	1.87045	875.784	29.9946	55.7067	0.329212	13.7326	0.317547	85.2818	1.17511	146.415	1.99833	0.644422	0.0590705	0.0892858	0.00590427	199.24	0.998082	4.9016	1.66294	0.611155	0.0293875	0.0548562	0.00370978	3.87881	0.714504	0.000157587	6.88616e-05	0.00259565	0.00028591	0.00124049	0.000175138	0.0399686	0.00367275	0.397052
170	0.0143868	7.40193e-05	1.62019	0.012133	15.6672	0.0806069	3.99908	0.0325135	3.8875	0.020001	1.3083	0.00906792	24.0533	0.230826	115.471	1.85759	1174.24	257.798	50.5779	0.441698	18.451	0.393796	96.3492	1.35321	139.646	2.01491	0.099632	0.00489456	0.0226809	0.00255322	184.139	1.10851	50.0751	8.59236	1.0344	0.304329	0.0112162	0.00121961	0.144225	0.00968108	0.00172955	0.000226709	0.00364014	0.000491718	0.00150045	0.000191396	0.0204978	0.00172477	0.214002
171	-0.0100793	5.18574e-05	2.11213	0.0158169	16.0495	0.0825741	4.24615	0.0218463	4.17636	0.0214872	0.582011	0.00381309	23.358	0.224154	116.522	1.74409	1814.1	28.0005	62.8407	0.314797	23.1925	0.437766	103.325	1.32531	159.487	2.18446	-0.00373803	0.000434145	0.0216087	0.000975642	71.8031	0.402356	48.9641	5.47235	1.66489	0.0400388	0.00255521	0.000245935	0.0111716	0.00157623	0.00142494	0.000204381	0.00265545	0.000285317	0.00200449	0.000219798	0.0496038	0.00461119	0.441964
172	0.0133661	6.8768e-05	2.25318	0.0168732	16.1368	0.0830231	4.24343	0.0218323	4.14292	0.0213151	0.612775	0.00401464	23.13	0.221966	118.496	1.77364	226.253	2.21255	57.1886	0.286483	26.3509	0.466794	102.694	1.31722	158.97	2.15815	0.0148834	0.000862255	0.00774252	0.000579385	69.5544	0.353369	93.1275	11.8483	0.000481258	0.000156321	-6.84478e-05	3.99886e-05	-0.00210598	0.000679831	0.000441698	0.00011308	0.00128867	0.000197493	0.00221115	0.000344322	0.0552909	0.0041583	0.48353
173	0.0113182	5.82315e-05	1.72093	0.0128874	15.8845	0.0817252	4.08391	0.026508	4.03355	0.0207525	0.886592	0.00580858	24.1735	0.23198	117.646	1.83093	1564.91	122.614	57.1137	0.414003	25.7512	0.569505	116.08	1.62241	164.479	2.15879	0.940433	0.0651346	0.0364124	0.0020321	130.198	1.32354	19.0131	4.60955	1.4864	0.14716	0.0860207	0.00643868	4.6954	0.316701	0.000534496	0.000125792	0.00369126	0.000338117	0.00161995	0.000198632	0.0279461	0.00456149	0.243891
174	0.062115	0.000319579	1.71132	0.0128154	15.6803	0.0806747	4.20275	0.021623	4.095	0.0210686	0.90934	0.00595761	23.99	0.230219	123.013	1.84125	1744.68	44.3311	61.329	0.414976	24.0499	0.407519	111.711	1.43287	173.339	2.15207	0.631239	0.0355241	0.14067	0.0116213	126.314	1.0129	88.0996	7.81798	1.59056	0.0417388	0.0551195	0.004009	3.9701	0.138745	0.00234313	0.000262863	0.00561712	0.000850196	0.00223419	0.000232837	0.0282175	0.00348025	0.23527
175	0.0427254	0.00021982	1.89252	0.0141723	15.896	0.0817842	4.18945	0.0215545	4.10576	0.021124	0.609269	0.00399167	24.0587	0.230878	113.734	1.70236	1018.89	56.843	66.0643	0.636041	28.8372	0.457352	120.87	1.55035	165.49	2.21959	0.012848	0.000800814	0.122232	0.0216175	85.5433	0.428525	24.4647	3.95617	0.709681	0.0860464	0.00198979	0.000215782	0.0323048	0.00266171	0.000950904	0.000165903	0.00391207	0.000466038	0.00197027	0.000216707	0.0362652	0.00388446	0.295696
176	0.000636556	3.563e-06	2.07853	0.0155653	15.7933	0.0812557	3.96804	0.0204154	3.88252	0.0199754	1.69607	0.011112	22.9949	0.220669	119.559	1.78955	495.997	7.42314	53.9218	0.270119	21.8133	0.451725	93.3738	1.20088	164.399	2.28913	0.629803	0.0194584	0.0387413	0.00331987	216.768	1.40757	59.3693	9.84086	0.107174	0.00802971	0.125575	0.00399797	1.90759	0.0771813	0.00096661	0.000168801	0.00331618	0.000319689	0.00121408	0.000171677	0.0323605	0.00254952	0.353608
177	0.236278	0.00346691	2.31492	0.0173355	15.1915	0.0781595	4.16262	0.0229342	4.08146	0.020999	0.619591	0.0040593	22.1698	0.212752	88.6247	1.32653	205.855	2.36744	63.8133	0.31967	13.2645	0.291959	99.8532	1.28077	157.734	2.15857	0.440726	0.0285056	0.336236	0.0087014	50.0725	0.315807	0.349467	0.0138272	0.00062277	0.000175994	0.05154	0.00388242	2.02399	0.104909	0.00112783	0.000178631	0.00315773	0.000305566	0.00176255	0.000202692	0.0457557	0.00362013	0.362151
178	0.00782996	4.02848e-05	1.61107	0.0120647	15.8771	0.0816872	3.895	0.0200396	3.80904	0.0195973	1.61698	0.0105938	24.1696	0.231942	127.72	1.95262	953.288	94.6675	54.2707	0.271867	27.5602	0.537625	87.5051	1.13904	140.66	1.93686	0.1687	0.0151899	0.0506456	0.00463889	194.058	1.18058	71.462	5.40423	0.730303	0.101533	0.0207103	0.000703956	0.483773	0.0994631	0.00096302	0.000167896	0.0040024	0.000349955	0.00121703	0.000171331	0.0264755	0.00354712	0.299271
179	0.00983494	5.06003e-05	1.65506	0.0123941	16.0587	0.0826212	3.99007	0.027546	3.92327	0.020185	1.25888	0.00824766	24.4456	0.234591	138.259	2.09975	1401.09	34.8726	54.2651	0.376592	25.1736	0.441115	99.3326	1.32187	153.167	2.49104	0.263461	0.0305851	0.0445892	0.00654161	175.413	0.878723	46.4364	8.27138	1.19795	0.0411133	0.0723993	0.00644691	1.18902	0.199053	0.000357373	0.000100794	0.00232345	0.000262697	0.00144762	0.000184226	0.019774	0.00166196	0.251901
180	0.113029	0.00911395	2.22443	0.0166579	15.4556	0.0795183	4.21285	0.0216749	4.05902	0.0208835	1.45452	0.016903	22.2419	0.216027	80.5361	1.20546	294.604	3.23315	56.7319	0.407707	11.2402	0.241378	98.0888	1.28576	167.464	2.48878	0.0535581	0.00818912	0.594221	0.0230446	224.596	2.78153	0.394517	0.0127902	0.000274322	0.000118504	0.00181193	0.00020657	0.36009	0.0688941	0.00196198	0.000238876	0.00631024	0.000683894	0.00181723	0.000208747	0.0361337	0.00371441	0.296952
181	-0.00546662	2.81255e-05	1.72189	0.0128946	15.949	0.0820569	4.00361	0.0205984	3.89987	0.0200647	1.79005	0.0121821	23.8043	0.228437	114.457	1.73791	602.01	35.4152	53.8867	0.269943	24.8292	0.463113	89.147	1.14345	144.996	1.9703	0.0817757	0.0102139	0.0570496	0.0015807	224.017	1.1222	67.204	6.12038	0.216	0.0285841	0.0131537	0.000555519	0.235135	0.0629919	0.00130237	0.000193626	0.00353004	0.000325808	0.00173146	0.000202817	0.0376168	0.00473501	0.317597
182	0.235924	0.00876159	2.19241	0.0164181	15.0662	0.0775148	4.16472	0.0223484	4.05098	0.0208421	1.93374	0.0126691	21.6728	0.207982	91.2615	1.37427	1373.42	38.5113	68.552	0.476112	18.6361	0.414328	84.89	1.08885	168.234	2.31472	0.144845	0.00623149	0.51673	0.0185314	401.861	2.0131	12.71	1.30508	1.036	0.0317223	-0.000525081	0.000109263	0.0878854	0.00585684	0.00178585	0.000223928	0.00396629	0.000341041	0.00185283	0.000207228	0.0394553	0.0031405	0.325272
183	0.0391476	0.00493265	2.26057	0.0169285	15.6632	0.0805865	3.77532	0.0194238	3.68579	0.0189633	1.64551	0.0107807	22.802	0.218819	93.0452	1.39269	2050.18	182.572	56.0495	0.280777	31.2133	0.492605	93.179	1.19517	180.804	2.65972	0.0428067	0.0014688	0.0968391	0.00763507	188.668	1.41182	101.08	3.8875	2.0336	0.211422	-0.00130658	0.000175225	0.0705986	0.00568906	0.00270696	0.000280212	0.00705081	0.00103868	0.00249608	0.000244508	0.0411602	0.00352205	0.406101
184	0.0150506	7.74347e-05	2.28624	0.0171208	15.975	0.0821906	4.09187	0.0210525	3.98557	0.0205056	1.8517	0.0125121	22.6155	0.217029	97.6084	1.461	758.197	22.4283	56.7521	0.284297	32.2249	0.578427	91.438	1.17284	170.725	2.42045	0.151779	0.0114654	0.0906106	0.00613403	261.623	1.95395	179.723	4.71133	0.334299	0.0237969	0.0242307	0.00250312	0.743997	0.0718371	0.00870944	0.000812303	0.0248215	0.00141397	0.00278894	0.000256738	0.0488108	0.00493494	0.390059
185	0.0083639	4.30319e-05	2.08545	0.0156171	16.0251	0.0824483	4.19821	0.0215996	4.09994	0.021094	0.661287	0.00433248	23.8823	0.229186	86.7756	1.29885	373.976	10.9838	57.134	0.28621	10.7734	0.225611	110.327	1.41511	158.824	2.03592	-0.00107079	0.000230532	0.00904147	0.000625996	53.7941	0.269479	5.75365	0.966111	0.0960458	0.00768469	0.00186784	0.000209098	0.0062278	0.00116182	0.000171189	7.02483e-05	0.0014534	0.000209086	0.00220279	0.000229197	0.0461145	0.00374285	0.361781
186	-0.003389	1.74363e-05	2.00404	0.0150075	16.1847	0.0832696	4.3082	0.028663	4.23679	0.0217981	0.608761	0.00398834	24.0297	0.2306	90.4001	1.43958	261.111	2.95715	58.8235	0.342495	8.23059	0.179238	98.4653	1.32873	145.386	1.94993	-0.00419416	0.000449004	0.00990465	0.000644704	56.0472	0.32729	0.377925	0.011061	0.000235447	0.000107729	-0.0019213	0.000208676	0.00251136	0.000725485	0.00501777	0.000374558	0.0745136	0.00149573	0.00121579	0.000167516	0.0339122	0.00345231	0.314608
187	0.00336639	1.73199e-05	1.83776	0.0137623	15.8727	0.0816646	3.91522	0.0201436	3.81152	0.0196101	1.58403	0.0112303	23.9588	0.229919	112.56	1.68478	462.283	7.60398	55.3165	0.277106	22.2421	0.503898	95.5326	1.22535	160.021	2.27944	0.0366756	0.00467131	0.0348155	0.00360928	184.73	0.925394	97.0326	6.05814	0.0896968	0.00686953	-0.00096958	0.000151145	0.0131014	0.00168947	0.000183735	7.29963e-05	0.00205442	0.000249321	0.00117042	0.000167602	0.0302885	0.0038417	0.327099
188	0.129831	0.0101637	2.22065	0.0166296	15.2993	0.0787144	4.4194	0.0227376	4.26573	0.021947	2.37505	0.0155603	21.4036	0.205399	56.6354	0.891439	508.571	13.6663	67.4839	0.343289	7.73066	0.142649	88.9263	1.14062	171.698	2.31924	0.415938	0.015316	0.521751	0.016286	598.123	2.99627	9.6998	1.68053	0.0837013	0.00207365	0.056342	0.00625986	0.730227	0.048217	0.00434191	0.000878107	0.0126456	0.000614062	0.00151155	0.000188751	0.0381837	0.00352008	0.289224
189	0.206444	0.00419388	2.25781	0.0169079	15.2001	0.0782038	3.83448	0.0244589	3.78886	0.0194935	1.36987	0.0113828	22.4583	0.21552	82.7953	1.26096	359.648	7.90293	59.8443	0.410784	15.9699	0.334952	94.0723	1.25692	177.055	2.70442	0.0506363	0.00488317	0.461945	0.0182356	147.641	0.770358	6.86434	0.826629	0.0509997	0.00720366	0.0263735	0.00255976	0.0468102	0.00410357	0.0310478	0.00436066	0.0467125	0.00528542	0.0122237	0.00181982	0.0833395	0.0101888	0.301251
190	0.350091	0.00785923	2.46911	0.0184902	14.1638	0.0728722	4.50989	0.0405321	4.47139	0.0230051	2.04525	0.0133996	20.0474	0.192384	40.7757	0.669869	899.541	17.4823	69.6531	0.514467	14.789	0.281846	84.0327	1.13252	168.294	2.15237	0.186293	0.00777348	1.21073	0.0268146	479.569	4.4841	10.0562	2.61339	0.511003	0.0169208	0.0166337	0.00268601	0.0556357	0.00430808	0.00823693	0.000699954	0.0148442	0.00146944	0.00384639	0.000289258	0.0470384	0.0032273	0.289857
191	0.0182633	9.39641e-05	2.07379	0.0155298	15.8273	0.0814309	4.11829	0.0211884	3.98384	0.0204967	1.20164	0.00872204	23.5582	0.226076	91.5575	1.37043	545.357	41.4422	55.6877	0.295449	13.1533	0.252914	102.658	1.332	162.686	2.34144	0.17509	0.0122127	0.0523353	0.0081587	157.641	0.789695	2.60892	0.377661	0.241642	0.0436251	0.0166526	0.00198493	0.583325	0.0374753	0.000555186	0.000126997	0.00307871	0.000305427	0.00155298	0.000193458	0.0407278	0.00401966	0.385989
192	-0.00424679	2.18496e-05	3.14088	0.0235209	15.9441	0.0820318	4.0229	0.024481	3.90002	0.0200654	0.611539	0.00400655	21.5517	0.20682	104.548	1.73929	356.515	13.5295	46.7716	0.2343	18.3251	0.32186	109.75	1.40772	209.55	2.52774	0.140573	0.0079498	0.0844442	0.0169419	81.6215	0.570793	46.1458	5.80008	0.230585	0.0244061	0.0379573	0.00259394	0.266274	0.0206568	0.00180577	0.000227811	0.00649801	0.000897345	0.00142139	0.000184078	0.0448946	0.00363935	0.359323
193	0.073307	0.0016873	3.04649	0.022814	15.6287	0.0804089	3.80811	0.0214614	3.79624	0.0195315	0.584362	0.00382849	21.1834	0.207377	110.134	1.64848	496.271	71.368	49.4676	0.306529	18.8994	0.46274	104.051	1.37779	192.847	2.67593	0.618784	0.0245165	1.02909	0.244956	68.3933	0.469905	22.7176	7.64294	0.533266	0.11697	0.409015	0.0339157	4.06841	0.129941	0.011072	0.00256785	0.0413738	0.00821518	0.00557577	0.000832191	0.069432	0.0069587	0.354132
194	0.0129232	6.64893e-05	2.43711	0.0182506	15.9326	0.0819723	3.99436	0.028653	3.88395	0.0199828	1.15058	0.00753814	23.2444	0.223064	72.9561	1.16352	231.825	2.70151	47.9693	0.392193	5.10444	0.146228	104.704	1.44267	180.299	2.46013	0.140985	0.00895574	2.0441	0.50564	126.131	1.00814	0.398697	0.0144441	-0.000395539	0.00014237	0.0408046	0.00307514	25.5887	7.04256	0.0572339	0.00812078	0.0177463	0.00214939	0.0140024	0.00173144	0.119453	0.00986748	0.29741
195	0.0443661	0.00547284	1.8808	0.0140846	15.7414	0.0809889	4.3599	0.0224315	4.26609	0.0219489	2.94223	0.0192762	22.158	0.212639	72.3408	1.09761	1065.69	32.9604	63.9708	0.396145	21.2338	0.39903	78.6027	1.0082	169.417	2.06106	0.913019	0.0167318	0.42005	0.00685126	735.001	3.68195	66.3476	6.41899	0.600694	0.0426846	0.0657854	0.00301753	3.00126	0.0709607	0.00369302	0.000617879	0.006881	0.000840664	0.00207273	0.000217251	0.0426951	0.00428287	0.369047
196	0.00539975	2.77815e-05	1.92268	0.0143982	16.0127	0.0823845	4.17979	0.0215048	4.13725	0.021286	0.579852	0.00379895	24.4299	0.23444	107.406	1.60764	313.766	5.72174	63.0079	0.315635	23.1166	0.388415	109.653	1.40648	141.011	2.10469	0.376949	0.0171706	0.112502	0.0043095	75.5512	0.37847	7.25257	1.42509	0.0191003	0.000980564	0.0948407	0.00568819	3.82758	0.106539	0.00135675	0.000195633	0.0125166	0.00201308	0.00152241	0.000189006	0.0408664	0.00322522	0.410087
197	0.0607585	0.00894939	1.79524	0.0134438	15.7265	0.0809122	3.83573	0.0317301	3.80912	0.0195978	1.67664	0.0109846	23.9799	0.230122	109.825	1.75291	1601.89	90.6442	56.6363	0.665145	16.7542	0.342844	89.3796	1.18115	166.321	2.51735	0.316873	0.0196365	0.280072	0.0131727	181.961	1.02957	22.3633	3.27934	1.57724	0.104533	0.0362224	0.00295114	0.787688	0.0444477	0.00677417	0.00115619	0.0132053	0.00188141	0.00318536	0.000273278	0.0370498	0.00341103	0.295851
198	-0.00162459	8.35844e-06	1.58517	0.0118707	15.63	0.0804159	4.76299	0.0245054	4.60071	0.0236704	3.4913	0.0228736	22.2083	0.213121	26.8508	0.402149	571.673	5.72689	56.2021	0.281542	1.60998	0.11202	60.1378	0.771361	153.638	2.29771	0.165003	0.00776785	0.0675635	0.00341968	474.115	2.37506	0.483792	0.0151279	0.00245044	0.000354616	0.0264755	0.00220447	0.0390811	0.00422761	0.0096582	0.000825709	0.0203065	0.00120275	0.00464772	0.000714274	0.0369932	0.0043681	0.311608
199	0.182705	0.0044289	2.05698	0.015404	15.1979	0.0781924	4.73572	0.0243651	4.62922	0.0238172	2.1474	0.0207542	21.6003	0.207287	46.5908	0.70884	402.614	4.68673	64.0662	0.320936	4.2439	0.143442	69.7844	0.895094	145.461	2.02391	0.084132	0.00566222	0.695415	0.0092786	223.99	2.38601	0.434886	0.0109839	0.00126032	0.000246504	0.0235179	0.00108694	0.061594	0.00916495	0.0057262	0.000699142	0.0210899	0.00176897	0.00321886	0.000269698	0.0356044	0.00386709	0.341686
200	0.0448292	0.00290952	2.82941	0.0211883	16.0132	0.0823874	3.94375	0.0202904	3.84355	0.0197749	0.778687	0.00690359	22.3465	0.214447	87.9346	1.3162	191.601	2.0157	51.4251	0.471115	9.68404	0.257082	106.064	1.36043	189.866	2.69316	0.188374	0.0139173	1.52783	0.0147861	66.7933	0.4197	0.418326	0.0116589	-0.000264514	0.000114358	0.0675385	0.00555425	1.20499	0.0397091	0.013654	0.00127547	0.0307446	0.00142372	0.00534841	0.000868733	0.0680906	0.00733076	0.426233
211	0.120737	0.00700595	1.53197	0.0114723	15.5353	0.0799285	5.1764	0.0266324	5.03212	0.0258901	3.45252	0.0289602	21.3674	0.230364	32.621	0.48827	616.252	10.3547	64.8938	0.325082	2.36673	0.138873	49.7147	0.637669	118.97	1.53807	0.255988	0.00949066	0.801045	0.02618	587.674	2.94392	0.482578	0.0166952	0.00253438	0.000352868	0.0822881	0.00602169	0.508575	0.035147	0.0107186	0.00113437	0.020603	0.00101831	0.00323612	0.000469692	0.0461505	0.00604857	0.318681
212	0.253082	0.00501558	2.01498	0.0150894	14.9547	0.0769413	5.11347	0.0263086	4.93272	0.0253786	2.30389	0.0363245	20.7208	0.223393	39.3025	0.596332	463.29	8.33248	70.8374	0.354857	3.09333	0.144728	68.2962	0.876005	141.99	1.78315	0.082928	0.00651504	7.19038	0.390399	323.528	9.4902	0.413164	0.0110144	0.00154324	0.000275232	0.00744214	0.00088218	0.752922	0.0213168	0.0936247	0.0060852	0.308642	0.0198109	0.0573724	0.00309969	0.386676	0.0233193	0.504836
213	0.267863	0.029853	1.75907	0.0137728	15.1835	0.0983506	4.23108	0.0217688	4.12623	0.0212293	0.638413	0.00442909	23.4905	0.253253	90.1329	1.43492	380.591	40.7476	71.9431	1.13977	14.8468	0.263938	123.101	1.67333	139.755	2.00663	0.0308881	0.0012204	1.21766	0.129806	85.2889	1.08308	6.15729	0.883866	0.11614	0.00243375	0.0032108	0.000270386	1.4722	0.125408	0.00242165	0.000260843	0.00484336	0.00074866	0.00142355	0.000181899	0.0316991	0.00209626	0.24384
214	0.433217	0.0135157	1.72516	0.012919	14.7039	0.0756507	3.82589	0.0234442	3.74115	0.0192481	1.74299	0.0114193	22.3866	0.241351	93.9041	1.4297	365.839	11.5836	74.0606	0.82596	11.884	0.233083	83.1528	1.0798	145.8	2.32771	0.0376897	0.00134226	3.11942	0.106835	145.606	0.868307	4.71653	0.856866	0.0675152	0.00183477	0.00715982	0.000970583	0.394581	0.0170719	0.0968621	0.00270825	0.237867	0.00547907	0.0319359	0.00153677	0.168937	0.00533594	0.422963
215	0.622798	0.0422238	1.79411	0.0151133	14.0156	0.11223	3.88569	0.0310963	3.79202	0.024954	1.70429	0.0160103	21.642	0.233325	98.1034	1.66859	746.995	30.9729	78.6103	2.03159	17.4562	0.366048	74.8573	1.02013	151.46	2.04239	0.101809	0.0106974	1.36151	0.0716312	136.64	1.85348	17.9886	3.8019	0.517403	0.0317766	0.00799217	0.00125511	0.960214	0.0863039	0.00951621	0.00109194	0.0304892	0.00243547	0.00492491	0.00061478	0.0584834	0.00487636	0.353978
216	0.20788	0.0230595	1.98516	0.018844	15.1805	0.0781028	3.94301	0.043282	3.92142	0.0201756	0.783417	0.00513262	23.3054	0.251257	93.1681	1.58873	289.356	6.32519	62.2505	1.3075	16.9491	0.372028	119.303	1.69952	176.047	3.3052	0.148989	0.00971586	0.451332	0.0385352	105.468	1.30519	6.05351	0.650835	0.00432537	0.000466733	0.0322919	0.00228068	1.49963	0.110461	0.00586739	0.00167114	0.0120317	0.0019764	0.00166655	0.000198337	0.0345671	0.00536582	0.217622
217	0.052208	0.00298594	2.25024	0.0168512	15.9984	0.0823113	4.1368	0.0212837	4.07462	0.0209637	0.605175	0.00396485	23.0376	0.24837	106.574	1.5952	358.449	19.6991	55.6954	0.279003	23.893	0.48586	99.8836	1.28116	160.614	2.17307	0.00628049	0.000566529	0.114041	0.00662602	66.1569	0.421229	96.0389	17.736	0.191082	0.0229478	-0.00271703	0.00025681	0.0185219	0.00203455	0.00499488	0.00142069	0.0123731	0.00360414	0.00306637	0.000616033	0.0570439	0.00407539	0.471051
218	0.0175753	9.04242e-05	2.33877	0.0175142	16.2639	0.0836772	4.18829	0.0215486	4.10287	0.0211091	0.61387	0.00402182	23.1679	0.249775	107.138	1.60363	936.707	97.6232	56.514	0.339626	24.6396	0.428965	100.533	1.28949	160.421	2.25026	0.162445	0.0111154	0.316557	0.0123008	67.1196	0.336232	60.7126	8.42874	0.973579	0.122474	0.0272532	0.00192952	1.6638	0.097239	0.00445709	0.00079437	0.0182205	0.00275149	0.00352541	0.000588372	0.0628421	0.00567024	0.467841
219	0.416924	0.0178969	2.12368	0.0159034	14.6652	0.0877728	4.24493	0.02184	4.20042	0.021611	0.514242	0.00457045	21.8132	0.263436	94.644	1.44903	261.644	6.80647	78.1511	1.14383	23.5209	0.410316	95.5249	1.29229	158.94	2.23413	0.259349	0.0327015	0.67685	0.0274795	60.8298	0.365283	10.4665	1.39064	0.0374755	0.00586927	0.0429314	0.00299386	2.02941	0.198257	0.00335237	0.000306128	0.0120836	0.0015162	0.00319199	0.000443506	0.0514017	0.0035354	0.333112
220	0.0897347	0.00506623	1.70734	0.0127856	15.8431	0.081512	3.83666	0.0220297	3.76307	0.0193609	1.57844	0.0103412	23.5796	0.254213	111.393	1.66732	739.938	34.5451	54.8738	0.28336	20.4346	0.367602	92.1047	1.18139	145.889	1.92762	0.569686	0.0450494	0.434229	0.0148685	185.098	0.92724	11.9645	1.37096	0.450695	0.0323487	0.0644774	0.00517933	3.69886	0.260174	0.00758374	0.000471105	0.017197	0.00298772	0.0042699	0.000320654	0.0336311	0.00415739	0.319183
221	0.139088	0.000715602	1.70448	0.0129901	15.482	0.121748	4.14828	0.0213427	4.0377	0.0207738	0.769146	0.00548512	23.8856	0.257512	109.005	1.63395	299.689	5.61865	61.0984	1.17403	13.4864	0.252803	125.657	1.66377	144.641	1.92277	0.0186811	0.00096987	0.462536	0.0699059	103.965	1.52401	10.9833	0.875673	0.00767063	0.000631828	-0.00199544	0.000218189	0.0467626	0.00905773	0.00418596	0.000352383	0.012572	0.00250098	0.0022362	0.000233617	0.0331474	0.00427621	0.237843
222	0.0649251	0.00537584	1.78456	0.0133639	15.8327	0.0814584	4.17112	0.0214602	4.11373	0.021165	0.600154	0.00393196	24.2276	0.261199	108.066	1.61753	429.437	15.9148	66.2251	0.459284	29.4396	0.504595	125.434	1.62225	142.017	2.00451	0.649785	0.0378193	0.32152	0.0601258	85.5715	0.481731	32.6178	2.76926	0.13191	0.0146019	0.171752	0.0125136	2.65876	0.189862	0.00521388	0.00084345	0.0150423	0.00146606	0.0029731	0.000270724	0.0402903	0.00454449	0.310352
223	0.120195	0.00561725	2.27377	0.0170274	15.6745	0.0806446	4.03366	0.023323	4.00392	0.0206	0.653648	0.00428242	22.7808	0.245601	102.586	1.55016	448.833	48.9363	55.732	0.346602	22.4121	0.429534	97.8136	1.25461	163.551	2.24965	-0.000392426	0.000139171	0.22612	0.00895088	55.3166	0.339995	9.43472	1.41915	0.311844	0.0547344	-0.00263354	0.000248815	0.0146268	0.00178341	0.00099292	0.000170345	0.00543875	0.000707032	0.0022769	0.000234003	0.0493934	0.00349741	0.472796
224	0.446928	0.0102156	1.74008	0.0130308	14.5478	0.0748476	4.22919	0.0332635	4.17528	0.0214816	0.911128	0.00596933	22.3835	0.241318	95.1994	1.47506	571.895	72.1289	72.0706	0.688353	17.0974	0.354056	113.449	1.45516	142.683	2.1172	0.0744552	0.00664888	0.700904	0.0146344	138.717	0.715592	2.14715	0.443939	0.333463	0.0862649	0.0120013	0.000517331	0.182401	0.010897	0.00315957	0.000295389	0.016444	0.00151249	0.00229073	0.000291832	0.0303849	0.00399336	0.196601
225	0.651229	0.0335715	1.63294	0.0133556	14.0192	0.101785	3.90319	0.0208757	3.85332	0.0198252	1.83033	0.0143366	21.8792	0.235881	107.03	1.80874	778.069	30.2857	70.8684	1.34958	16.8435	0.304426	72.7432	0.960274	150.536	2.15315	0.173284	0.0128354	1.09487	0.0564371	155.085	1.81928	1.34972	0.119996	0.519102	0.0197491	0.0108947	0.0013921	1.87634	0.0669436	0.00460837	0.000352499	0.0135618	0.00135683	0.00324779	0.000433261	0.042978	0.00377773	0.318667
226	5.69173e-05	8.37888e-07	2.45556	0.0183887	16.0877	0.0827708	4.01121	0.0206375	3.98784	0.0205173	0.616746	0.00404066	22.9855	0.247809	102.401	1.53274	495.422	19.2398	52.297	0.26198	22.2389	0.498067	102.605	1.31607	179.602	2.43787	0.843759	0.0394174	0.0303321	0.00246581	64.7016	0.32412	3.68572	0.325078	0.326205	0.0287604	0.110187	0.00588483	5.70337	0.212889	0.00216267	0.000372669	0.00746281	0.000617468	0.00245823	0.00024444	0.0508628	0.00442728	0.457891
227	0.0818555	0.00467246	2.04871	0.015342	15.7602	0.0810858	4.1884	0.038824	4.07864	0.0290451	0.619882	0.00406121	23.6202	0.254651	107.587	1.61036	591.564	48.8506	62.349	0.436769	26.702	0.49487	117.293	1.50447	166.984	2.09704	5.57288	0.242692	5.461	1.31584	82.5946	0.413754	66.7134	8.37121	0.370239	0.0610728	0.581181	0.0242226	25.731	0.890892	0.0209734	0.0039508	0.0347304	0.00464634	0.00705342	0.00152382	0.0567787	0.00646686	0.254933
228	0.00367602	1.8913e-05	2.0013	0.0164538	16.0695	0.0826769	4.07472	0.0209643	3.94492	0.0202965	0.865403	0.00607896	23.88	0.257452	101.365	1.51722	292.252	5.0755	53.9054	0.270037	14.8909	0.339059	116.771	1.49777	151.149	2.48543	3.10659	0.224181	0.0370863	0.00267369	116.871	1.34078	1.77613	0.451674	0.00354199	0.000432921	0.321756	0.0188866	15.9218	1.05211	0.00420277	0.000357092	0.00947873	0.000884895	0.00187647	0.000340292	0.0377134	0.00404335	0.329502
229	0.0223103	0.00305586	2.15148	0.0161116	16.1346	0.0830119	4.25586	0.0218962	4.18662	0.02154	0.627331	0.00411001	23.2485	0.250644	104.157	1.55902	639.606	53.499	56.2226	0.281644	22.3923	0.401166	99.6218	1.2778	160.457	2.3181	0.0178055	0.000943145	0.0264344	0.00344003	70.9378	0.5665	1.67134	0.264629	0.504952	0.0761492	0.00139177	0.000181558	0.00837852	0.00135805	0.00078518	0.000152411	0.000936051	0.000169719	0.00179217	0.000208486	0.0525365	0.00455943	0.514095
230	0.101199	0.0187252	2.89669	0.0216922	15.848	0.0815371	3.87628	0.0199433	3.84052	0.0197593	0.601547	0.00394108	21.664	0.233561	104.791	1.68113	162.437	9.03664	51.0817	0.87907	21.27	0.373621	103.488	1.32739	192.621	2.51005	0.0496165	0.00628068	0.219165	0.0275969	51.5109	0.585748	0.34983	0.0107097	0.0223568	0.00650118	0.00514873	0.000346256	0.184787	0.0306221	-7.22908e-05	4.58194e-05	0.00420173	0.00040995	0.00274529	0.000375528	0.0636828	0.00493468	0.538061
231	0.0161485	8.30833e-05	1.95059	0.0161604	16.1489	0.0830855	4.09007	0.0230376	4.01492	0.0206566	0.70726	0.00463367	24.0044	0.258793	112.887	1.72848	389.461	26.5183	56.229	0.395342	19.5178	0.375928	120.329	1.66594	154.83	3.02743	0.977464	0.0735465	0.316249	0.00722829	100.832	1.10666	0.652739	0.0185785	0.102464	0.0306928	0.0853129	0.00667807	8.51206	0.384074	0.000586502	0.000132399	0.00550146	0.00086299	0.00212694	0.000228195	0.037249	0.00426209	0.326351
*BIR-1G is used as the primary reference material
[truncated: 29 more columns]

## Sheet: S3g_BIR-1G (Session 1)
Table S3g. LASS-ICP-MS trace element analyses of BIR-1G (Session 1) where NIST-SRM614 is used as the primary reference material.
	Major elements (wt %)														Trace elements (μg/g)
Analyses	Na	2s	Mg	2s	Al	2s	Ca (43)	2s	Ca (44)	2s	Mn	2s	Fe	2s	Sc	2s	Ti	2s	V	2s	Cr	2s	Co	2s	Zn	2s	Rb	2s	Sr	2s	Y	2s	Zr	2s	Nb	2s	Cs	2s	Ba	2s	La	2s	Ce	2s	Pr	2s	Nd	2s	Sm
3	1.29716	0.00912938	6.67152	0.101057	8.92813	0.0684773	8.90141	0.0532503	8.8786	0.0552662	0.135859	0.00714508	14.5624	1.49279	13.7443	0.203476	6890.4	157.643	324.046	3.92074	406.015	23.5441	56.4072	0.960411	113.26	3.14222	0.20673	0.00781754	106.55	1.20543	12.7571	0.12081	12.3833	0.327442	0.487628	0.012781	0.007194	0.00042406	5.90627	0.0994062	0.567632	0.00890264	1.80616	0.0203016	0.328677	0.00536398	2.21658	0.0487722	0.94753
4	1.29095	0.00891203	6.67319	0.101083	8.7967	0.0609498	8.97089	0.053666	8.91408	0.0554871	0.13575	0.0071393	14.4648	1.48279	13.6349	0.194938	6899.64	157.854	325.016	3.93247	406.132	23.4771	56.2544	0.94728	113.935	2.86587	0.194663	0.00647751	107.013	1.19522	12.7455	0.117879	12.4895	0.324047	0.491126	0.0112787	0.00797	0.000441762	5.79881	0.0801473	0.544932	0.00851862	1.78538	0.0248189	0.336684	0.00503741	2.17198	0.0506498	0.989384
53	1.29045	0.00765834	6.89277	0.0640935	9.02961	0.0824956	9.10601	0.0706154	9.07899	0.0744962	0.151945	0.00924276	11.7256	0.462478	15.1578	0.212835	7137.45	122.626	329.455	3.3206	453.863	26.3045	55.246	0.985187	103.53	2.92711	0.199721	0.00630355	107.274	1.23284	12.6877	0.232877	12.1471	0.201285	0.493655	0.0102637	0.006078	0.000378249	6.10815	0.0922976	0.558777	0.0090055	1.81489	0.0241292	0.332376	0.00618541	2.26531	0.0534508	0.975047
54	1.30231	0.00772873	6.88241	0.0639971	9.05102	0.0826912	9.09051	0.0704951	9.05641	0.0743109	0.151475	0.00921418	11.7076	0.46177	15.7439	0.194999	7090.88	121.826	328.885	3.31486	464.248	26.8442	57.0436	0.970835	106.876	3.04832	0.192699	0.00583806	107.122	1.19643	13.1956	0.210698	12.5804	0.183305	0.517028	0.0109991	0.001249	0.00017404	6.14751	0.0866207	0.582202	0.00783514	1.85713	0.0235813	0.35104	0.00568696	2.31536	0.0476655	0.984313
103	1.30044	0.00894095	6.90601	0.0569184	9.05645	0.0823891	9.10995	0.0756354	9.08524	0.0739131	0.157273	0.0085362	10.4986	0.387256	16.8451	0.174864	7296.22	119.118	335.624	3.08853	486.632	27.9886	57.5572	0.93115	107.759	1.64733	0.211814	0.00680327	106.174	1.18585	13.1773	0.256766	12.336	0.174856	0.500656	0.00929449	0.002013	0.000218628	6.03834	0.0852431	0.56676	0.00877149	1.8446	0.0228029	0.34661	0.0049078	2.25605	0.043104	1.02113
104	1.28795	0.00765361	6.89215	0.0568041	9.10126	0.0827967	9.13737	0.0719408	9.09586	0.0739995	0.155906	0.008462	10.4869	0.386823	16.8952	0.161892	7286.38	118.957	335.144	3.08411	476.798	27.6438	55.7952	0.9778	104.098	2.09312	0.198234	0.00755777	106.513	1.18963	13.2584	0.24143	12.488	0.167524	0.50695	0.00762726	0.001903	0.00021054	6.03478	0.0779469	0.561049	0.006876	1.80686	0.0229351	0.329361	0.00486075	2.2498	0.0437424	1.02608
153	1.28642	0.00780475	6.98206	0.0644603	9.28861	0.0633614	9.29235	0.0576229	9.25055	0.0578666	0.165226	0.00652754	11.4605	1.39803	17.8368	0.31918	7250.08	172.85	339.193	2.93641	480.781	27.8547	56.7481	0.96422	101.995	1.52447	0.184856	0.00497832	108.304	1.2846	13.6735	0.185822	13.0892	0.305649	0.50892	0.00791426	0.004405	0.000316598	6.14657	0.102436	0.585478	0.00870152	1.84252	0.0203481	0.354416	0.00555185	2.27196	0.0506437	1.02208
154	1.28657	0.0093752	6.94798	0.0641457	9.21107	0.0628324	9.21185	0.0556275	9.10669	0.0569667	0.165194	0.00655691	11.3963	1.39021	17.8573	0.315175	7183.69	171.267	333.912	2.89069	476.277	27.4551	56.9188	0.980288	103.056	1.47347	0.179142	0.00484344	106.472	1.18917	13.648	0.162011	12.9882	0.298065	0.502124	0.00885526	0.004136	0.000312649	6.11557	0.0952966	0.570593	0.00962427	1.85406	0.0233064	0.339514	0.00569662	2.33339	0.0474986	1.01573
203	1.30577	0.00787311	6.83013	0.0806341	9.07197	0.0601662	9.13193	0.0619839	9.07605	0.061722	0.176017	0.0106536	10.7143	1.38112	18.1167	0.336653	7001.03	175.751	329.26	5.6775	467.321	26.9268	56.7799	0.960843	105.63	1.65896	0.185121	0.00611152	106.744	1.19221	12.8974	0.131184	11.9342	0.351172	0.478955	0.00932053	0.002407	0.000236228	6.00366	0.0909516	0.551055	0.00645812	1.82011	0.0223329	0.337132	0.00575375	2.19261	0.0433958	1.007
204	1.29641	0.00781667	6.90272	0.081491	9.16687	0.126808	9.15401	0.144239	9.28629	0.0631517	0.177137	0.0107214	10.7442	1.38892	18.713	0.408131	7160.37	179.751	334.942	5.77546	474.485	27.8598	56.9736	1.1333	103.746	1.65767	0.184443	0.0046681	109.053	1.27755	13.6901	0.17553	12.6574	0.382305	0.515947	0.0134787	0.00455	0.00032411	6.06594	0.100255	0.578707	0.00824881	1.85675	0.0260189	0.345479	0.00582523	2.31096	0.0555274	1.03078
253	1.28811	0.00778905	6.89513	0.074766	9.19351	0.085292	9.34613	0.0630372	9.24938	0.0607955	0.185094	0.01087	13.0598	0.523083	18.9672	0.369979	7836.65	138.553	334.622	5.86311	499.177	29.0004	57.7426	0.984934	110.884	2.07041	0.191963	0.00500484	108.767	1.22198	13.4432	0.132118	12.8077	0.278228	0.512029	0.0101191	0.005329	0.000351504	6.05765	0.0964017	0.558548	0.00799607	1.90082	0.0223342	0.343237	0.00514948	2.29354	0.046291	1.02158
254	1.29135	0.00767622	6.89394	0.0735954	9.28742	0.0861632	9.35668	0.0654159	9.26857	0.0609216	0.18419	0.0107367	13.1212	0.52554	19.7342	0.382422	7816.51	138.196	335.205	5.87332	506.852	29.3257	58.1423	0.961787	109.932	1.72301	0.184111	0.00507765	109.846	1.31687	14.1662	0.12647	13.4784	0.292652	0.502779	0.00875464	0.004747	0.000337158	6.31234	0.0810737	0.597016	0.0076347	1.90083	0.0229131	0.351901	0.00500157	2.36104	0.0439956	1.0557
303	1.29636	0.00794265	6.91412	0.0614983	9.30569	0.0918183	9.39126	0.0680625	9.31903	0.0578408	0.190713	0.00743625	12.1986	0.71923	18.115	0.322108	7480.61	128.451	339.654	4.3722	530.486	30.7188	57.4141	0.94187	105.748	2.0692	0.194499	0.00424356	107.48	1.20043	13.8734	0.158721	12.9703	0.168125	0.523451	0.00951783	0.003908	0.000295019	6.04026	0.0761507	0.576278	0.00960497	1.86035	0.0201524	0.351155	0.0050532	2.23167	0.0475635	1.05595
304	1.2889	0.00789695	6.85797	0.0609988	9.35191	0.0922743	9.33308	0.0676409	9.23246	0.0573036	0.189239	0.00733304	12.1011	0.71427	18.4796	0.327346	7414.44	127.315	342.245	9.15521	526.242	30.3181	57.4921	0.965303	104.015	2.06318	0.196223	0.0058691	107.123	1.19644	14.2427	0.160629	13.1773	0.18118	0.510763	0.00811805	0.006384	0.000383413	6.16484	0.0968716	0.577991	0.00869303	1.84967	0.0205862	0.33671	0.00592229	2.23839	0.0454406	1.00905
353	1.31245	0.00848843	7.03231	0.143346	9.29694	0.0821556	9.36097	0.0679149	9.23691	0.0563864	0.217547	0.00868861	11.4143	0.762275	18.7789	0.179897	7401.06	194.862	339.134	4.30508	552.059	31.8333	58.0186	0.94106	107.323	1.74478	0.192114	0.00543952	108.442	1.21118	13.5751	0.18855	12.985	0.173466	0.50327	0.00977627	0.003826	0.000294163	6.11702	0.0839764	0.582099	0.00907138	1.87173	0.021289	0.348199	0.00452587	2.26762	0.0464851	1.0351
354	1.28243	0.00788824	7.01465	0.142986	9.29571	0.0821447	9.3259	0.0676605	9.23746	0.0563897	0.21327	0.00854263	11.3799	0.761551	18.6058	0.270847	7402.4	194.898	340.09	4.57503	542.303	31.9115	56.6596	1.07194	103.716	1.99374	0.190239	0.00567588	108.851	1.32471	13.518	0.204652	12.8479	0.202618	0.505977	0.0132287	0.005931	0.000366322	6.07086	0.0947327	0.580618	0.0095702	1.86072	0.0284583	0.34186	0.00582452	2.25345	0.0546113	1.02057
403	1.28295	0.0102566	7.30343	0.15287	9.18671	0.078639	9.20652	0.0599015	9.14566	0.0572874	0.174393	0.00615248	11.96	1.53914	19.1739	0.190036	7474.84	266.649	338.493	4.98101	522.932	30.2856	58.6438	0.989037	110.244	2.92605	0.189038	0.00594696	108.954	1.21689	13.7406	0.137242	13.0643	0.151452	0.522049	0.0130556	0.004289	0.000321115	6.36407	0.111788	0.586535	0.008623	1.89133	0.0250274	0.354716	0.00517582	2.24302	0.0405149	1.03703
404	1.25353	0.0108811	7.15623	0.166679	9.16682	0.0784688	9.10712	0.0592548	9.10345	0.0570231	0.170579	0.00599584	11.6005	1.49287	18.8421	0.215236	7419.47	264.673	332.757	4.89659	514.585	29.8244	57.449	1.02462	108.178	2.86287	0.190729	0.00685981	107.78	1.20378	13.644	0.157427	12.9885	0.163729	0.497091	0.0124748	0.005761	0.000373554	6.09434	0.100225	0.572216	0.00992982	1.85512	0.0250764	0.344994	0.00552579	2.25393	0.0494479	1.02008
453	1.29662	0.012029	7.08376	0.215356	9.26839	0.0754083	9.18968	0.0627477	9.18363	0.0613824	0.144522	0.00829697	9.44882	1.25893	18.0463	0.253138	7415.32	241.407	338.916	5.33067	458.843	26.5186	57.4497	0.981315	105.955	2.92849	0.201601	0.00540777	111.464	1.24493	13.662	0.225207	12.8849	0.155362	0.491389	0.0100856	0.008712	0.000859364	6.23461	0.0938668	0.584556	0.00998459	1.87473	0.0261387	0.354264	0.00661386	2.25194	0.0484777	1.05532
454	1.27305	0.00769916	7.02904	0.213693	9.21005	0.0749337	9.09999	0.0621353	9.11358	0.0609143	0.143772	0.0082539	9.27414	1.23585	17.5652	0.297798	7380.33	240.268	336.653	5.29508	446.888	26.3657	55.5738	1.10792	102.201	2.95823	0.189752	0.0046343	110.83	1.2382	13.3069	0.252151	12.7023	0.183512	0.49718	0.00879137	0.004519	0.000339596	6.02284	0.102941	0.58081	0.0120272	1.8204	0.0243525	0.337329	0.00531408	2.21057	0.050757	1.01422
494	1.26284	0.0082374	7.39642	0.36394	9.35266	0.0980633	9.29706	0.0729258	9.25228	0.0707822	0.147518	0.0133185	10.3262	0.78846	17.7307	0.363154	7578.5	256.342	335.059	4.58344	490.699	28.6341	55.9216	1.01933	97.429	3.04361	0.201028	0.00586571	114.34	1.27705	13.9091	0.40009	12.842	0.217841	0.516756	0.0106177	0.005076	0.000358775	6.13977	0.0999546	0.602584	0.0105678	1.89919	0.0268527	0.354983	0.00625293	2.36107	0.0475269	1.02468
Average	1.28919		6.9599		9.17226		9.19622		9.15101		0.16822		11.6022		17.5516		7324.58		334.681		484.934		56.9634		106.167		0.193272		108.338		13.4672		12.7544		0.504082		0.00478033		6.09449		0.574592		1.85111		0.34384		2.2643		1.01754
2s	0.0271094		0.346588		0.288897		0.268244		0.234887		0.0461701		2.75562		3.36883		504.77		9.90375		78.9406		1.76437		7.99403		0.0160061		3.99379		0.885233		0.734097		0.0235127		0.00387349		0.245784		0.0287174		0.0659685		0.0170141		0.100876		0.0533146
GeoRem Preferred value	1.37		5.67		8.81		9.5		9.5		0.15		8.08				5400		326		392		52		78				109		14.3		14		0.52						0.609		1.89		0.37		2.37		1.09
2s	0.05		0.06		0.11		0.1		0.1		0.008		0.078				200		32		24		5		17				2		1.4		1.2		0.04						0.02		0.04		0.02		0.03		0.02
[truncated: 29 more columns]

## Sheet: S3h_BIR-1G (Session 2)
Table S3h. LASS-ICP-MS trace element analyses of BIR-1G (Session 2) where NIST-SRM614 is used as the primary reference material.
	Major elements (wt %)														Trace elements (μg/g)
Analyses	Na	2s	Mg	2s	Al	2s	Ca (43)	2s	Ca (44)	2s	Mn	2s	Fe	2s	Sc	2s	Ti	2s	V	2s	Cr	2s	Co	2s	Zn	2s	Rb	2s	Sr	2s	Y	2s	Zr	2s	Nb	2s	Cs	2s	Ba	2s	La	2s	Ce	2s	Pr	2s	Nd	2s	Sm
	1.2951	0.00805341	7.36765	0.0379062	12.2099	0.0628195	9.24033	0.0476644	8.88193	0.0514022	0.142552	0.000733426	12.3311	0.0698865	19.9454	0.227306	7816.86	40.2174	330.515	1.70048	487.368	4.43979	55.0955	0.496876	104.227	1.16782	0.207152	0.00714537	108.906	1.05437	11.8151	0.13963	11.2638	0.122239	0.46728	0.00788004	0.00770456	0.00040459	6.08509	0.0942128	0.530807	0.00820758	1.82818	0.0229936	0.336364	0.00606948	2.20374	0.0459512	0.893119
	1.29414	0.00665831	7.34478	0.0377886	12.1451	0.062486	9.09435	0.04679	8.80386	0.0452955	0.143171	0.000918222	12.3656	0.0715098	20.1741	0.128046	7778.62	40.0207	330.1	1.69835	496.548	3.27533	56.2502	0.335657	107.139	1.53328	0.197254	0.00567145	108.695	0.700249	12	0.0655831	11.5223	0.0750611	0.490477	0.00912714	0.00604831	0.000362904	6.21945	0.0730243	0.536186	0.00715436	1.89105	0.024733	0.340435	0.00487043	2.22724	0.0242607	0.951985
	1.29834	0.0066799	7.49102	0.038541	12.7546	0.0656218	9.70892	0.049952	9.03425	0.0464808	0.201494	0.00106679	13.6899	0.0991586	19.8925	0.252823	7568.34	38.9388	353.397	1.83229	450.879	5.73251	54.8588	0.651679	103.869	1.31841	0.19156	0.00542247	114.421	0.995406	12.203	0.127675	11.1717	0.141951	0.51383	0.00774541	0.00337008	0.000259265	6.14545	0.0906566	0.563626	0.00874298	1.9061	0.0205681	0.350173	0.00567504	2.13232	0.0394556	0.974964
	1.29688	0.00667237	7.50178	0.0385963	12.8168	0.0659419	9.74336	0.0501291	9.04919	0.0465577	0.201015	0.00106244	13.5995	0.0699687	20.622	0.187482	7553.48	38.8623	350.657	1.80412	462.191	3.78122	56.6337	0.44638	106.513	1.06319	0.195016	0.00627552	114.948	0.591402	12.732	0.116323	11.5252	0.112159	0.516673	0.00893683	0.00331755	0.000262756	6.3568	0.0838751	0.572726	0.00571207	1.93419	0.0208979	0.358616	0.00552828	2.2174	0.0278209	0.975219
	1.28876	0.0066306	7.59124	0.0390566	11.6607	0.0599938	10.035	0.056824	9.05442	0.0465846	0.222337	0.00114391	21.294	0.109557	19.9758	0.212333	7299.82	37.5573	354.987	1.82639	541.634	5.38774	56.7479	0.495512	105.776	1.1486	0.20455	0.00611821	117.251	0.776631	12.0354	0.108478	11.4429	0.0823279	0.512416	0.00689961	0.00772063	0.000840867	6.53274	0.0774547	0.570518	0.00541098	1.903	0.0154757	0.359295	0.00332824	2.16322	0.0282876	0.993404
	1.28896	0.00663162	7.62479	0.0392292	11.8159	0.0607924	10.0485	0.0541548	9.11779	0.0469107	0.2226	0.00119049	21.2418	0.109288	20.7221	0.149623	7346.75	37.7987	357.044	1.83698	546.995	4.82196	57.3798	0.400734	106.986	1.02963	0.207368	0.00573597	117.92	0.606693	12.5981	0.0783424	12.0038	0.0745635	0.512207	0.00846454	0.00540532	0.000330644	6.65467	0.0530748	0.575795	0.00708596	1.94376	0.0145388	0.367269	0.00556329	2.25725	0.0330726	0.974717
	1.30155	0.00669641	7.6154	0.0391809	11.7828	0.060622	9.87891	0.0508266	8.98966	0.0462514	0.236786	0.00121825	14.66	0.085043	20.2163	0.19839	7155.58	36.8151	346.899	1.78478	498.636	4.82296	58.2222	0.547553	108.043	1.62895	0.20115	0.00455824	114.662	0.58993	12.2267	0.116219	11.7235	0.105495	0.499103	0.00579177	0.00354605	0.000265046	6.47596	0.0608303	0.576987	0.00859332	1.90828	0.0172657	0.352753	0.00585762	2.14197	0.0377477	0.93987
	1.31675	0.00677465	7.63626	0.0392882	11.7165	0.0602807	9.78026	0.050319	8.97681	0.0461853	0.237859	0.00129784	14.7125	0.0756951	20.2498	0.218869	7138.25	36.726	345.665	1.77843	492.282	5.39128	58.4944	0.665635	108.473	1.66969	0.208339	0.0068261	115.307	0.593248	12.1377	0.100276	11.7256	0.10949	0.5034	0.00952431	0.00614065	0.000352283	6.52955	0.10754	0.574276	0.00699394	1.91038	0.0194113	0.352762	0.0053656	2.16552	0.0282176	1.01429
	1.29317	0.00665331	7.65585	0.039389	11.7422	0.0604132	9.89195	0.0508937	9.06618	0.0466451	0.290691	0.0014956	19.1284	0.0984147	20.5687	0.214461	7335.77	37.7422	344.22	1.7829	401.99	3.68421	59.178	0.409933	105.938	1.11576	0.190893	0.00461708	113.996	0.639385	12.3001	0.0839226	11.7235	0.108572	0.479658	0.00875263	0.00331789	0.000251219	6.16997	0.0789342	0.572683	0.0065695	1.88131	0.0144926	0.348864	0.0029735	2.19412	0.0241376	0.95956
	1.27929	0.0071534	7.55218	0.0388556	11.626	0.0611987	9.66097	0.0497053	8.96576	0.0461285	0.286701	0.00218733	18.8798	0.118966	19.7911	0.264429	7200.28	37.0451	339.913	2.28388	392.368	4.75261	57.2177	0.603274	103.794	1.52783	0.185503	0.00607217	112.918	0.761986	11.7453	0.129066	11.2485	0.118401	0.488476	0.00570213	0.00340371	0.000251304	5.91421	0.0759323	0.535993	0.00631899	1.81097	0.0216713	0.346865	0.00608781	2.0976	0.0377002	0.988767
	1.27953	0.00789485	7.6383	0.0392988	12.2581	0.0630674	10.0966	0.0519464	9.18937	0.0472789	0.252353	0.00143672	26.8289	0.138033	20.8673	0.147416	7590.07	39.0506	339.76	1.74805	693.762	3.56938	61.026	0.313976	106.567	0.784384	0.19187	0.00577709	117.151	0.628946	12.4261	0.0829629	11.8947	0.0725909	0.526799	0.00809328	0.00259365	0.00021979	6.53793	0.0817283	0.596342	0.00589247	1.9816	0.0182084	0.369636	0.00563646	2.20725	0.0198008	0.990585
	1.2825	0.00659841	7.51476	0.0386631	12.0673	0.0620857	9.73538	0.070197	8.89627	0.0457709	0.25036	0.00128809	26.6224	0.136971	20.303	0.221222	7344.13	37.7852	332.079	1.7463	653.937	7.07462	59.5312	0.580061	105.366	1.75979	0.190386	0.00612272	114.32	0.709609	12.2305	0.0963944	11.4425	0.10746	0.490667	0.00940417	0.00400635	0.000278892	6.16852	0.0728829	0.570665	0.00831295	1.92012	0.0191887	0.352735	0.00464889	2.108	0.0268614	0.968107
	1.28015	0.00679732	7.57561	0.0544399	11.5269	0.0844616	10.1851	0.0578228	9.19551	0.0493733	0.320637	0.00179914	30.3837	0.160866	20.6737	0.218854	7956.25	50.1829	343.952	1.96406	413.597	3.38514	61.954	0.40558	105.764	0.912079	0.195863	0.00461815	117.655	0.77371	12.2772	0.122383	11.7373	0.121231	0.505996	0.00783271	0.00563477	0.000324421	6.44049	0.0952543	0.580358	0.0103289	1.97714	0.0233816	0.362333	0.00553219	2.26729	0.0358375	0.979496
	1.28679	0.00687557	7.49732	0.0385734	11.4992	0.0591628	10.0279	0.051593	9.05132	0.0465686	0.316706	0.00180179	30.1742	0.155245	20.532	0.234857	7878.74	40.5358	339.464	1.74653	411.308	4.27817	61.9642	0.603567	104.86	0.977351	0.203705	0.00842188	116.451	0.761613	12.2428	0.124483	11.7234	0.0958965	0.492674	0.00742417	0.00576943	0.000333047	6.26214	0.0796224	0.567459	0.00590086	1.94421	0.021795	0.35163	0.00650164	2.16876	0.0300688	0.952526
	1.27406	0.00820308	7.41184	0.0532071	12.0001	0.0908184	9.98259	0.05136	9.15027	0.0645377	0.200867	0.00151673	18.4773	0.116459	21.3329	0.269222	8534.41	53.7205	357.079	2.74277	765.857	8.16357	64.9097	0.534181	105.139	1.30515	0.191522	0.00478116	115.36	0.63799	12.3201	0.145982	11.9588	0.152527	0.495252	0.010254	0.00412549	0.000282955	6.38467	0.0915133	0.562314	0.0067434	1.96082	0.02417	0.360977	0.00614086	2.24026	0.0337012	0.97244
	1.26596	0.00744709	7.34351	0.0476829	11.934	0.0613999	9.84196	0.0506365	9.04389	0.0465304	0.199114	0.00156044	18.2846	0.0940736	21.469	0.219986	8482.52	43.6422	353.164	1.81701	750.805	6.52562	64.7055	0.49546	104.393	1.11663	0.188089	0.00548693	114.052	0.654973	12.264	0.113306	11.8929	0.12773	0.485482	0.00708843	0.00223082	0.000211501	6.30252	0.0628918	0.567072	0.00686772	1.93098	0.0182246	0.350035	0.0049029	2.20328	0.035907	1.00616
Average	1.28887		7.52264		11.9723		9.8095		9.02915		0.232828		19.5421		20.4585		7623.74		344.931		528.76		59.0106		105.803		0.196889		114.626		12.2221		11.625		0.498774		0.00464595		6.32376		0.565863		1.91451		0.353796		2.1872		0.97095
2s	0.0243389		0.215166		0.786957		0.588802		0.217516		0.106183		12.2563		0.9774		862.522		18.2451		245.563		6.25451		2.83835		0.0149842		5.40122		0.502961		0.520478		0.0309706		0.00344325		0.400785		0.0350013		0.0939212		0.017891		0.101164		0.0572925
GeoRem Preferred value	1.37		5.67		8.81		9.5		9.5		0.15		8.08				5400		326		392		52		78				109		14.3		14		0.52						0.609		1.89		0.37		2.37		1.09
2s	0.05		0.06		0.11		0.1		0.1		0.008		0.078				200		32		24		5		17				2		1.4		1.2		0.04						0.02		0.04		0.02		0.03		0.02
[truncated: 29 more columns]

## Sheet: S3i_NIST614 (Session 1)
Table S3i. LASS-ICP-MS trace element analyses of NIST-SRM614 (Session 1) where BIR-1G is used as the primary reference material.
	Major elements														Trace elements (μg/g)
Analyses	Na (wt %)	2s	Mg (μg/g)	2s	Al (wt %)	2s	Ca (43) (wt %)	2s	Ca (44) (wt %)	2s	Mn (μg/g)	2s	Fe (μg/g)	2s	Sc	2s	Ti	2s	V	2s	Cr	2s	Co	2s	Zn	2s	Rb	2s	Sr	2s	Y	2s	Zr	2s	Nb	2s	Cs	2s	Ba	2s	La	2s	Ce	2s	Pr	2s	Nd	2s	Sm
1	10.904	0.102795	29.3287	0.319495	0.99879	0.0136003	9.08983	0.0825002	9.13168	0.0708394	1.62019	0.0400252	9.02381	0.980585	2.35935	0.0435006	3.34767	0.0995901	1.01162	0.0153868	1.11518	0.0587913	0.717422	0.0227066	1.91161	0.0408917	0.855089	0.0416994	46.1151	0.60407	0.888857	0.0195047	0.931929	0.0186997	0.870109	0.0259744	0.594628	0.0428594	3.59715	0.0602466	0.792187	0.0204394	0.846052	0.0137528	0.850802	0.0224866	0.797173	0.0232437	0.833066
2	10.9879	0.0969454	28.4762	0.39243	1.00582	0.0132825	9.08201	0.0767127	9.12355	0.0639626	1.49794	0.0348177	11.2288	0.815096	2.30434	0.036749	3.19306	0.0888263	1.02514	0.0125987	1.21521	0.0451341	0.743624	0.0186354	1.94371	0.0374087	0.86639	0.0412865	48.1276	0.709469	0.886721	0.0164616	0.985294	0.0175379	0.893429	0.0184911	0.616538	0.0435206	3.55161	0.0470664	0.789185	0.0157779	0.869883	0.00950952	0.86768	0.0191715	0.813677	0.0193095	0.885028
51	10.7969	0.0952601	27.9993	0.291301	0.983714	0.0102696	8.93259	0.0597903	8.94643	0.0545716	1.44244	0.0405728	13.1459	0.493544	2.1051	0.0339563	3.14318	0.0811563	1.01477	0.00894145	1.01452	0.0509513	0.734955	0.0141127	2.02441	0.0436517	0.88637	0.0272581	46.3151	0.540501	0.87898	0.0174188	0.958265	0.0201652	0.85271	0.019973	1.2575	0.722315	3.42507	0.0467122	0.780941	0.0163821	0.846512	0.0102232	0.849515	0.019223	0.785919	0.0166036	0.825035
52	10.8155	0.0954243	27.9133	0.279985	0.980524	0.00862994	8.94073	0.0598447	8.9694	0.0547117	1.31519	0.0444435	12.5791	0.618088	2.06671	0.0339108	3.17563	0.0765858	0.997914	0.0138738	1.00159	0.0560341	0.712312	0.0161608	2.12169	0.0528881	0.866934	0.0265448	47.2204	0.525088	0.881685	0.0169873	0.975572	0.0206365	0.834568	0.0194545	1.27633	0.733176	3.38556	0.0514756	0.770943	0.017009	0.841729	0.0106935	0.83128	0.0190629	0.780216	0.0178406	0.839486
101	10.8043	0.095326	27.7811	0.284769	0.973621	0.00732988	8.85109	0.0537686	8.88352	0.0521771	1.42009	0.0485062	15.0745	0.591121	1.91058	0.0287738	3.10837	0.0839802	0.985426	0.011776	0.975644	0.0738778	0.736194	0.0134807	2.06576	0.0436945	0.856303	0.0256728	46.5436	0.375447	0.845458	0.0173609	0.949844	0.0210192	0.867769	0.0180078	1.95243	1.13676	3.53285	0.0375794	0.772678	0.0160603	0.850695	0.0124416	0.835685	0.0188336	0.794615	0.0132173	0.832261
102	10.8292	0.0955456	28.1152	0.284913	0.98629	0.00707343	8.95538	0.0544021	8.99945	0.0528581	1.24988	0.0575632	13.6994	0.747151	1.88941	0.0302812	3.0908	0.0702539	0.987594	0.0101241	0.96777	0.0698247	0.707598	0.0139059	2.09882	0.0459699	0.82733	0.0248424	47.3251	0.409959	0.876625	0.0165972	0.968386	0.0184626	0.860357	0.0192628	1.99804	1.16336	3.43631	0.0350933	0.774684	0.0163833	0.848824	0.0122037	0.8317	0.0185918	0.813218	0.0147632	0.81345
151	10.8184	0.0954503	27.5747	0.302455	0.96309	0.00740923	8.77919	0.0609018	8.84897	0.0762044	1.30763	0.0480387	13.2278	0.629992	1.78591	0.0300638	3.13374	0.0739978	0.988812	0.0109168	0.965543	0.0595304	0.731727	0.0152009	2.13904	0.047139	0.94116	0.0264441	46.4826	0.527237	0.816933	0.0164615	0.910924	0.0143551	0.843024	0.0180099	1.10106	0.120899	3.40086	0.0422522	0.768343	0.0154102	0.837282	0.0111199	0.826036	0.0180973	0.775715	0.0161238	0.801786
152	10.8676	0.0958839	27.6974	0.257077	0.956996	0.00729261	8.7968	0.061024	8.86955	0.0763816	1.21203	0.0498225	13.4913	0.511412	1.78269	0.0324569	3.17391	0.0802951	0.977329	0.012903	0.943265	0.0511782	0.733296	0.0166072	2.11678	0.053433	0.946529	0.0267844	46.6378	0.539407	0.835294	0.0168646	0.914588	0.0144326	0.843492	0.0181268	1.07495	0.117673	3.37528	0.0331898	0.761255	0.0157529	0.820826	0.0104082	0.826788	0.0188047	0.790602	0.0167514	0.799632
201	10.791	0.095208	27.8742	0.314603	0.973834	0.00809138	8.87166	0.0653477	8.83393	0.109807	1.15145	0.0528613	12.1688	0.541491	1.75019	0.0294437	3.24613	0.116589	0.997652	0.0135548	1.03333	0.0705849	0.727841	0.0154022	2.09187	0.048246	0.927496	0.0190211	46.4001	0.695933	0.841982	0.0154124	0.947517	0.0275446	0.86096	0.0188456	1.27084	0.331544	3.44343	0.0450203	0.781435	0.0164442	0.844758	0.0109713	0.832349	0.0180515	0.789193	0.0233245	0.811049
202	10.8072	0.0953516	28.2632	0.26592	0.975568	0.00845357	8.8916	0.0654946	8.86283	0.110166	1.19563	0.0651976	16.354	0.539606	1.69487	0.0286359	3.12235	0.101198	0.993296	0.0125021	0.958661	0.0373231	0.722774	0.0126426	2.10964	0.0494245	0.920837	0.0185597	46.446	0.645638	0.841039	0.0160996	0.990664	0.0298875	0.865606	0.0199861	1.28953	0.336637	3.49918	0.0464395	0.76902	0.0156565	0.838812	0.0100785	0.841351	0.0183007	0.814878	0.0231074	0.794834
251	10.9089	0.0962486	27.8358	0.303887	0.964142	0.00942978	8.73453	0.0571299	8.81681	0.0942259	1.19996	0.0497315	10.9945	0.549794	1.66164	0.0257125	2.90442	0.0978984	0.976516	0.0111374	0.938935	0.0409826	0.720726	0.0167224	1.98509	0.0439446	0.919023	0.0204733	46.534	0.557739	0.832044	0.0160798	0.924264	0.0306674	0.864589	0.0177906	1.00267	0.262784	3.34246	0.0597685	0.77269	0.0170244	0.820576	0.00923726	0.838522	0.0191134	0.769002	0.0215466	0.813402
252	10.8937	0.0961141	28.2839	0.253208	0.95999	0.00871595	8.67279	0.0563055	8.7657	0.0936798	1.04617	0.0531555	12.0318	0.402683	1.68258	0.0287101	2.89986	0.101555	1.0116	0.0122235	0.933609	0.0653749	0.719911	0.0129993	1.98077	0.0443798	0.916274	0.0190047	45.5754	0.573742	0.838626	0.0161707	0.888061	0.0285115	0.839512	0.0188366	0.993036	0.260265	3.40087	0.0630876	0.770793	0.0158781	0.816197	0.0113205	0.827259	0.0181669	0.769298	0.0230457	0.810071
301	10.7888	0.0951889	27.9552	0.323308	0.96034	0.00734209	8.67915	0.0630924	8.77032	0.0621874	1.08092	0.050382	12.5439	0.626687	1.7787	0.0301542	3.0525	0.0750084	0.969639	0.0116571	0.78356	0.0477862	0.716382	0.0152511	2.08368	0.0582272	0.888191	0.0191419	46.6178	0.346274	0.802429	0.0161779	0.900403	0.0222579	0.844095	0.0175593	0.884846	0.153094	3.45868	0.07069	0.766121	0.0156291	0.831285	0.00838421	0.83128	0.0188071	0.803415	0.0191957	0.82458
302	10.8246	0.0955046	28.2079	0.356939	0.945375	0.0084013	8.66581	0.0583147	8.73656	0.0619742	1.11901	0.0669556	12.4177	0.495487	1.70436	0.029251	3.0498	0.0877497	0.975579	0.0109967	0.923044	0.0569123	0.718695	0.0152416	2.13447	0.052368	0.868497	0.01887	46.0874	0.391283	0.801242	0.0157854	0.91528	0.0243343	0.830737	0.020178	0.878928	0.151996	3.41225	0.0601494	0.754303	0.0154138	0.831366	0.00901808	0.818816	0.0181465	0.765597	0.0195816	0.773151
351	10.8469	0.0957011	27.2708	0.317867	0.953968	0.00687515	8.66084	0.0605022	8.77086	0.0621558	0.940819	0.0641189	12.4582	0.483827	1.69828	0.0306226	3.04549	0.0912054	0.965347	0.0133174	0.844819	0.0799201	0.709796	0.015749	2.0427	0.0406873	0.898478	0.0145387	46.1468	0.400427	0.823547	0.0152878	0.929858	0.0199932	0.83472	0.0205795	0.945406	0.209285	3.47058	0.0451142	0.747647	0.0157801	0.8226	0.00804216	0.826121	0.0179116	0.779453	0.0155005	0.804618
352	10.8819	0.0960104	27.5693	0.232784	0.961108	0.006837	8.74606	0.0610975	8.80686	0.0624109	0.981288	0.0576662	14.2254	0.52993	1.70929	0.0297972	3.05882	0.110214	0.990205	0.00988146	0.978399	0.0498588	0.732263	0.0127	2.0697	0.0497511	0.896296	0.0141404	46.3448	0.352695	0.837198	0.0176856	0.914985	0.0165877	0.847958	0.0189207	0.945697	0.209403	3.39438	0.0504255	0.761346	0.016064	0.830436	0.0068754	0.833248	0.0186668	0.809526	0.0143167	0.806042
401	10.9439	0.0965576	25.8839	0.409316	0.973484	0.00740826	8.88312	0.0663054	8.89181	0.0568744	1.18549	0.0574504	13.2657	0.369152	1.7012	0.030133	3.11746	0.0854633	0.990748	0.011016	0.858431	0.0594988	0.711445	0.0152376	2.00616	0.0482945	0.91182	0.0179342	46.0546	0.512108	0.82512	0.0206043	0.914035	0.0137119	0.863528	0.021128	0.93626	0.179379	3.32267	0.0697849	0.765388	0.0167416	0.829455	0.0103636	0.820265	0.0189159	0.802449	0.0149683	0.815019
402	10.9676	0.0967667	26.9263	0.315597	0.960717	0.00714326	8.87131	0.0618698	8.90953	0.0537577	1.23497	0.0477304	12.3422	0.692467	1.68167	0.0279179	2.95803	0.0920714	0.983472	0.0127251	0.861244	0.0675017	0.721133	0.0135981	2.05832	0.0415021	0.905635	0.0173378	46.5311	0.434624	0.834286	0.0183714	0.92068	0.0197787	0.840579	0.0184377	0.934063	0.178878	3.39126	0.0706665	0.754281	0.0172349	0.827482	0.010458	0.826603	0.0181788	0.791913	0.0134667	0.789356
451	10.9334	0.0964647	27.0402	0.368876	0.962641	0.00847453	8.90791	0.0710131	8.89933	0.0595375	1.41966	0.0560992	13.8043	0.54359	1.76016	0.0302606	3.13067	0.0925298	0.970414	0.0168853	1.05059	0.0641484	0.724237	0.0156525	2.11911	0.0568124	0.870128	0.0323234	45.1599	0.600581	0.826434	0.0173954	0.922581	0.0164189	0.869898	0.0190069	0.710562	0.207407	3.43258	0.0845167	0.752	0.0167462	0.819638	0.0159058	0.809442	0.0186829	0.804383	0.0198854	0.787729
452	10.9164	0.0963147	27.821	0.241997	0.965469	0.00807089	8.85673	0.0710526	8.86017	0.0604506	1.48205	0.0431293	19.0012	0.590656	1.78704	0.0337254	2.94919	0.0780117	0.991964	0.016466	1.0479	0.0582668	0.718839	0.0152193	2.04481	0.0481114	0.889244	0.0321026	44.8373	0.546228	0.830402	0.0174866	0.929921	0.0159288	0.854133	0.0180998	0.696443	0.203306	3.41331	0.0849566	0.737284	0.0165738	0.842493	0.0153891	0.806798	0.0175294	0.802644	0.0190043	0.789275
491	10.998	0.0970345	25.2146	0.471613	0.942702	0.00663311	8.74611	0.0654244	8.73778	0.0595513	1.33352	0.0338321	15.509	0.485853	1.82043	0.0330999	2.92445	0.0901773	0.98939	0.0117509	0.873371	0.0590542	0.736943	0.0128992	2.16807	0.05318	0.864043	0.0307585	44.1243	0.479943	0.803093	0.0164862	0.929001	0.0173161	0.833119	0.0181598	0.881927	0.23306	3.31457	0.0731909	0.73375	0.0148307	0.798914	0.0129071	0.806933	0.0193751	0.768874	0.0221034	0.792862
492	11.0249	0.0972724	26.9802	0.450426	0.953128	0.00773243	8.79112	0.0648129	8.79724	0.0599565	1.50826	0.0320347	13.8814	0.465382	1.78501	0.033203	3.03491	0.119848	0.971636	0.0146302	0.992501	0.0524828	0.719377	0.0130033	2.23495	0.0677834	0.852917	0.0307149	43.696	0.377029	0.828016	0.0193998	0.921682	0.0177744	0.819942	0.0188132	0.883913	0.233579	3.37521	0.0722344	0.74143	0.0161725	0.820629	0.0142675	0.81398	0.0183672	0.784328	0.0215558	0.826293
Average	10.8796		27.6369		0.968242		8.83665		8.87419		1.27021		13.294		1.83725		3.08457		0.989366		0.967142		0.723522		2.07051		0.889772		46.151		0.839819		0.933806		0.851583		1.05116		3.42619		0.764441		0.833475		0.829657		0.791186		0.812183
2s	0.1468		1.73321		0.0316444		0.245834		0.217287		0.363963		4.04282		0.3958		0.225896		0.0316968		0.190535		0.0196403		0.151173		0.0629857		1.99241		0.0535414		0.0545993		0.0343597		0.719565		0.142116		0.0314052		0.0304574		0.0293305		0.0315298		0.0470628
GeoRem Preferred value	10.1635		33.8		1.08		8.5048		8.5048		1.42		18.8				3.61		1.01		1.19		0.79		2.79		0.855		45.8		0.79		0.848		0.824		0.664		3.2		0.72		0.813		0.768		0.752		0.754
2s	0.2226		1.9		0.0264706		0.1429		0.1429		0.07		6				0.25		0.04		0.12		0.09		0.38		0.005		0.1		0.032		0.028		0.03		0.034		0.09		0.013		0.025		0.015		0.014		0.013
[truncated: 29 more columns]

## Sheet: S3j_NIST614 (Session 2)
Table S3j. LASS-ICP-MS trace element analyses of NIST-SRM614 (Session 1) where BIR-16 is used as the primary reference material.
	Major elements														Trace elements (μg/g)
Analyses	Na (wt %)	2s	Mg (μg/g)	2s	Al (wt %)	2s	Ca (43) (wt %)	2s	Ca (44) (wt %)	2s	Mn (μg/g)	2s	Fe (μg/g)	2s	Sc	2s	Ti	2s	V	2s	Cr	2s	Co	2s	Zn	2s	Rb	2s	Sr	2s	Y	2s	Zr	2s	Nb	2s	Cs	2s	Ba	2s	La	2s	Ce	2s	Pr	2s	Nd	2s	Sm
1	10.7156	0.0709188	27.6384	0.728013	0.73659	0.0235298	8.90147	0.134094	9.06417	0.0808577	1.34216	0.17633	14.5003	1.86152	1.51796	0.0533088	3.19974	0.277051	1.03794	0.0325438	0.648025	0.0450443	0.6997	0.0436379	2.07777	0.129765	0.855281	0.0391878	46.7361	0.53804	0.984669	0.0218823	1.06141	0.0396062	0.908963	0.0365295	0.680693	0.119112	3.42214	0.0926806	0.815367	0.020426	0.830952	0.0268412	0.833882	0.0179079	0.775604	0.0328749	0.943755
2	10.874	0.200445	24.7557	0.796316	0.721353	0.0263592	8.69155	0.182339	9.22761	0.181706	1.61775	0.15648	10.1613	0.312764	1.65977	0.0587594	2.63434	0.185582	0.968928	0.0321817	1.25193	0.0629722	0.796287	0.0419167	1.94378	0.136139	0.83327	0.0431484	45.3494	0.65566	0.90996	0.0261831	1.01601	0.0273091	0.884031	0.034615	0.667539	0.116967	3.34554	0.097691	0.831099	0.0222024	0.822004	0.027909	0.834177	0.0254158	0.813306	0.0395677	0.866987
51	10.7566	0.0629001	26.8204	1.14602	0.666038	0.0258229	8.48791	0.139916	8.92808	0.0661994	1.1445	0.0192192	10.6986	0.31951	1.61403	0.0483973	3.42332	0.232582	0.986512	0.0250264	0.889319	0.0513173	0.7601	0.0400429	2.38335	0.126	0.904859	0.0297022	44.3566	0.621453	0.938574	0.0240642	1.02499	0.0297015	0.838755	0.0262897	1.35943	0.138803	3.342	0.101502	0.774121	0.0225555	0.809797	0.0249283	0.812886	0.0193145	0.810835	0.0360331	0.831663
52	10.7149	0.0626567	23.5612	0.622072	0.714715	0.0235438	8.18475	0.138109	8.92361	0.071693	0.941917	0.0170463	11.945	2.14899	1.54035	0.0401305	2.50662	0.191296	0.87373	0.0290016	1.16007	0.0583492	0.702422	0.0298293	2.00448	0.0881546	0.86874	0.0375351	42.8438	0.631576	0.887659	0.0277803	1.08155	0.0335098	0.833808	0.0254886	1.30857	0.131473	3.31459	0.103886	0.772202	0.0189636	0.789914	0.0207871	0.808007	0.0186611	0.852893	0.0417227	0.88348
101	10.877	0.0627617	26.1495	0.682932	0.779314	0.0173264	8.23614	0.124312	8.9612	0.0732646	0.85402	0.0157818	6.65728	0.240056	1.58885	0.0504053	3.25717	0.192528	0.933139	0.0239668	1.01744	0.0530645	0.724247	0.0341524	1.99304	0.0787783	0.844779	0.0296902	43.337	0.724135	0.932836	0.0307487	1.01823	0.0279257	0.826065	0.028661	0.737889	0.114672	3.2181	0.0982443	0.773736	0.0206024	0.808691	0.0220926	0.797111	0.0188549	0.883962	0.0424699	0.860559
102	10.7837	0.0661817	24.2182	0.942809	0.732154	0.0249126	7.89987	0.20062	8.86542	0.0624728	1.02465	0.0172554	7.39782	0.251022	1.52082	0.0453489	2.84323	0.183315	0.910072	0.0269607	0.70076	0.0430493	0.684521	0.0444252	2.01426	0.122034	0.810773	0.0219953	41.5067	0.996736	0.893727	0.0312629	0.987295	0.0399651	0.828897	0.0264947	0.719488	0.112222	3.12184	0.108347	0.762286	0.0277478	0.790988	0.0221822	0.771269	0.0240876	0.760774	0.0379201	0.804793
151	10.6731	0.0785177	24.5163	0.936134	0.740178	0.0181546	8.13989	0.145153	9.0082	0.0631335	0.983088	0.0168099	8.70461	0.266642	1.5808	0.0492342	2.97567	0.250092	0.934602	0.0353737	0.812053	0.0464473	0.698918	0.0361549	1.85786	0.116823	0.842912	0.0313754	43.1612	0.773186	0.923821	0.0282805	0.989836	0.0330978	0.848637	0.021551	0.91061	0.242719	3.13902	0.108743	0.73763	0.0188951	0.798092	0.0225978	0.792583	0.0219483	0.805465	0.0392588	0.810976
152	10.6354	0.07824	26.399	0.950824	0.767458	0.0180977	8.24078	0.112747	9.02354	0.0598669	0.800216	0.0151075	12.1487	1.30036	1.5604	0.0407568	3.04218	0.256174	0.956418	0.0197075	1.05463	0.0537183	0.704247	0.0324158	2.01961	0.124205	0.827862	0.0228149	43.451	0.51272	0.916106	0.0283199	1.04804	0.0352698	0.880479	0.0224919	0.958958	0.255342	3.23225	0.0830462	0.782193	0.0237922	0.807546	0.0160156	0.802481	0.0178816	0.797515	0.0373082	0.86166
201	10.8828	0.0946437	26.4066	1.00154	0.759208	0.016371	8.30783	0.132669	8.99774	0.0683659	0.413156	0.0106878	13.118	0.349389	1.61212	0.0489611	3.47675	0.261826	1.02213	0.0276849	0.737736	0.0446782	0.696998	0.0343326	2.05231	0.117964	0.886317	0.0315187	44.3527	0.480343	0.945487	0.026073	1.05463	0.0328295	0.877353	0.0205053	1.36181	0.30742	3.44055	0.087719	0.780562	0.0198708	0.833446	0.0201821	0.812389	0.0177826	0.792603	0.0255491	0.850157
202	10.7913	0.0938474	25.1487	0.903905	0.754645	0.0228925	8.29578	0.129126	8.92695	0.0658832	1.02788	0.0174563	2.92133	0.158131	1.5151	0.0521067	2.93421	0.256521	0.954252	0.0205181	1.65005	0.0692265	0.743673	0.0304995	2.11774	0.105507	0.927154	0.0292752	43.9583	0.42514	0.951475	0.0274662	1.0166	0.0310815	0.881875	0.0226599	1.37977	0.311475	3.4102	0.0988047	0.792271	0.0216468	0.834831	0.0194482	0.810615	0.0180093	0.865765	0.0329263	0.861608
251	10.9366	0.0805964	25.7703	0.73034	0.721018	0.0212857	8.18644	0.179669	8.94488	0.135616	0.802985	0.0151332	7.09633	0.250478	1.56123	0.0511663	3.03221	0.196419	0.969771	0.0348418	0.71896	0.0438202	0.703964	0.0234708	2.11933	0.100993	0.891407	0.0269841	43.1535	0.52427	0.912586	0.0266762	1.00554	0.0305231	0.848546	0.0302182	1.43958	0.258394	3.31035	0.104522	0.76108	0.0150536	0.781153	0.0250833	0.804572	0.0185973	0.828581	0.0320979	0.877897
252	10.8477	0.0799412	23.1191	0.922166	0.731926	0.018389	8.09779	0.176768	8.86266	0.134369	0.87931	0.0159114	4.28181	0.191496	1.56969	0.0536565	2.92265	0.141154	0.964939	0.0315469	0.637527	0.0411698	0.661323	0.032403	2.04699	0.103253	0.900061	0.0281166	42.9648	0.450228	0.923237	0.0346176	1.01627	0.028698	0.834414	0.0308012	1.34903	0.242255	3.25714	0.105257	0.748664	0.0169523	0.796204	0.0222505	0.78952	0.0224763	0.822691	0.0367969	0.822312
301	10.8624	0.0680599	25.5839	0.678091	0.736865	0.0154261	7.96943	0.173507	8.91264	0.144078	0.558971	0.0124458	7.05389	0.243118	1.50666	0.0461006	3.20781	0.215677	0.992673	0.0207958	1.08425	0.0542752	0.670784	0.034189	1.84905	0.093953	0.871394	0.0348295	42.3939	0.62262	0.908068	0.0216341	0.972477	0.027432	0.869351	0.0371946	0.810481	0.140648	3.30334	0.102537	0.762975	0.0195889	0.770049	0.0198999	0.790364	0.0180046	0.801197	0.0255991	0.810829
302	10.864	0.0680696	25.1852	0.986228	0.804926	0.0182877	8.05352	0.168495	8.88966	0.145244	0.729117	0.0145177	2.62798	0.148489	1.59826	0.0585487	2.84719	0.192193	0.916571	0.0260937	1.21345	0.126866	0.675748	0.0383233	2.22624	0.112646	0.841714	0.0244706	42.9622	0.470729	0.925222	0.0165606	1.06274	0.037608	0.852679	0.032094	0.849892	0.147535	3.25929	0.0923294	0.767351	0.017499	0.796065	0.0203736	0.797267	0.0180331	0.839013	0.0416887	0.85055
351	11.0562	0.156312	26.6273	0.928675	0.724953	0.0124724	8.10714	0.0964649	8.89985	0.0882694	0.642921	0.0137382	10.9743	0.314868	1.49582	0.0507956	2.46862	0.228272	0.953958	0.0250752	0.630397	0.0414951	0.626381	0.0392966	2.06013	0.0713667	0.902244	0.0278791	43.2593	0.426025	0.933941	0.0233688	0.982537	0.0365774	0.861298	0.0221954	1.38862	0.335083	3.29168	0.0817404	0.771633	0.0193173	0.788411	0.0156943	0.787966	0.0185489	0.803598	0.0294031	0.777525
352	10.915	0.0745544	25.6932	0.869708	0.757446	0.0181089	8.19583	0.15558	8.85832	0.0878575	1.44597	0.13778	5.55509	0.222816	1.46422	0.0584439	2.6071	0.200448	0.919011	0.0316922	0.600997	0.0407853	0.62401	0.0453727	2.15009	0.0962964	0.896023	0.0348019	43.7016	0.580699	0.905673	0.0203367	1.00443	0.0342918	0.881453	0.024613	1.45556	0.351158	3.26535	0.100295	0.779393	0.0184801	0.792435	0.0140099	0.810873	0.0157014	0.78545	0.0313459	0.843968
Average	10.8241		25.4746		0.740549		8.24976		8.95591		0.950538		8.49014		1.55663		2.96117		0.955915		0.925475		0.698333		2.05725		0.869049		43.593		0.924565		1.02141		0.859788		1.08612		3.29209		0.775785		0.803161		0.803498		0.814953		0.84742
2s	0.216956		2.45282		0.0623757		0.513431		0.188479		0.640569		7.24811		0.103376		0.612558		0.0842035		0.592106		0.0890773		0.262166		0.0670025		2.42159		0.0476097		0.0641786		0.0488465		0.628752		0.181625		0.0457157		0.0383071		0.0326831		0.0657139		0.0778829
GeoRem Preferred value	10.1635		33.8		1.08		8.5048		8.5048		1.42		18.8				3.61		1.01		1.19		0.79		2.79		0.855		45.8		0.79		0.848		0.824		0.664		3.2		0.72		0.813		0.768		0.752		0.754
2s	0.2226		1.9		0.0264706		0.1429		0.1429		0.07		6				0.25		0.04		0.12		0.09		0.38		0.005		0.1		0.032		0.028		0.03		0.034		0.09		0.013		0.025		0.015		0.014		0.013
[truncated: 29 more columns]

[truncated: 2 more sheets: S3k_Detection Limits, S3l_Internal Standards]
