# Supplementary material for: Zircon micro-inclusions as an obstacle for in situ garnet U–Pb geochronology: an example from the As Sifah eclogite locality, Oman
Source: Copernicus journal article supplement (doi:10.5194/gchron-7-309-2025), 2025-08-06
Supplement: Supplementary file 2 [file gchron-7-309-2025-supplement.zip]

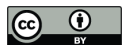

*Supplement of*

**Zircon micro-inclusions as an obstacle for in situ garnet U–Pb geochronology: an example from the As Sifah eclogite locality, Oman**

**Jesse B. Walters et al.**

*Correspondence to:* Jesse B. Walters ([jesse.walters@uni-graz.at](mailto:jesse.walters@uni-graz.at))

- [gchron-7-309-2025-supplement-title-page.pdf](#)
- [Supplementary\\_Information.pdf](#)
- [TableS1\\_EPMADData.xlsx](#)
- [TableS2\\_U-Pb\\_Data\\_Summary.xlsx](#)
- [TableS3\\_SplitStreamTraceElements.xlsx](#)
- [TableS4\\_TraceElements.xlsx](#)
- [TableS5\\_ZrnContamination.xlsx](#)
- [TableS6\\_U-Pb\\_Data\\_Reprocessed.xlsx](#)

The copyright of individual parts of the supplement might differ from the article licence.
